# Supplementary material for: Indion 860 catalyzed cascade reaction: a greener approach to functionalized cyclohexanones and their novel analogues
Source: Royal Society of Chemistry journal article supplement (doi:10.1039/c2ra23039a), 2012-12-20

### Multi-Recording

Sample : Indian 860 resin  
File : PX-120913-033.1547  
Comment : TDC1/P138

X-ray : CU K-ALPHA1 / 50 kV / 34 mA  
Gonio : RINT2000 Wide angle goniometer  
Attachment : Standard Sample Holder  
Filter : Not installed  
Monochro : Automatic monochromator  
Divergence slit: "1deg."  
Scattering slit: "1deg."  
Receiving slit: "0.15mm"

Counter : Scintillation counter  
Scan mode : CONTINUOUS  
Scan speed : 3 deg./min.  
Scan step : 0.02 deg.  
Scan axis : 2 Theta / Theta  
Scan range : 3 -> 45 deg.  
Theta offset: 0 deg.  
Sample rotation: 0 deg.

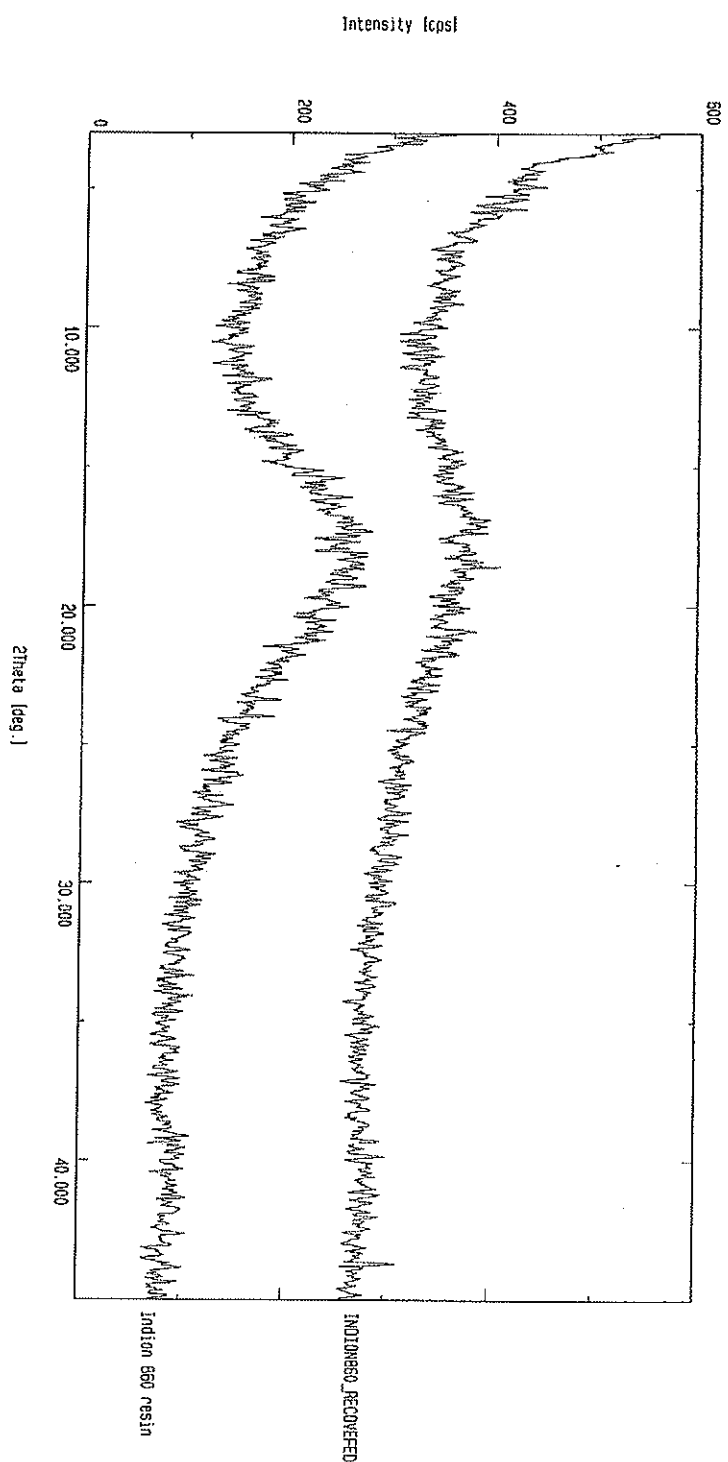

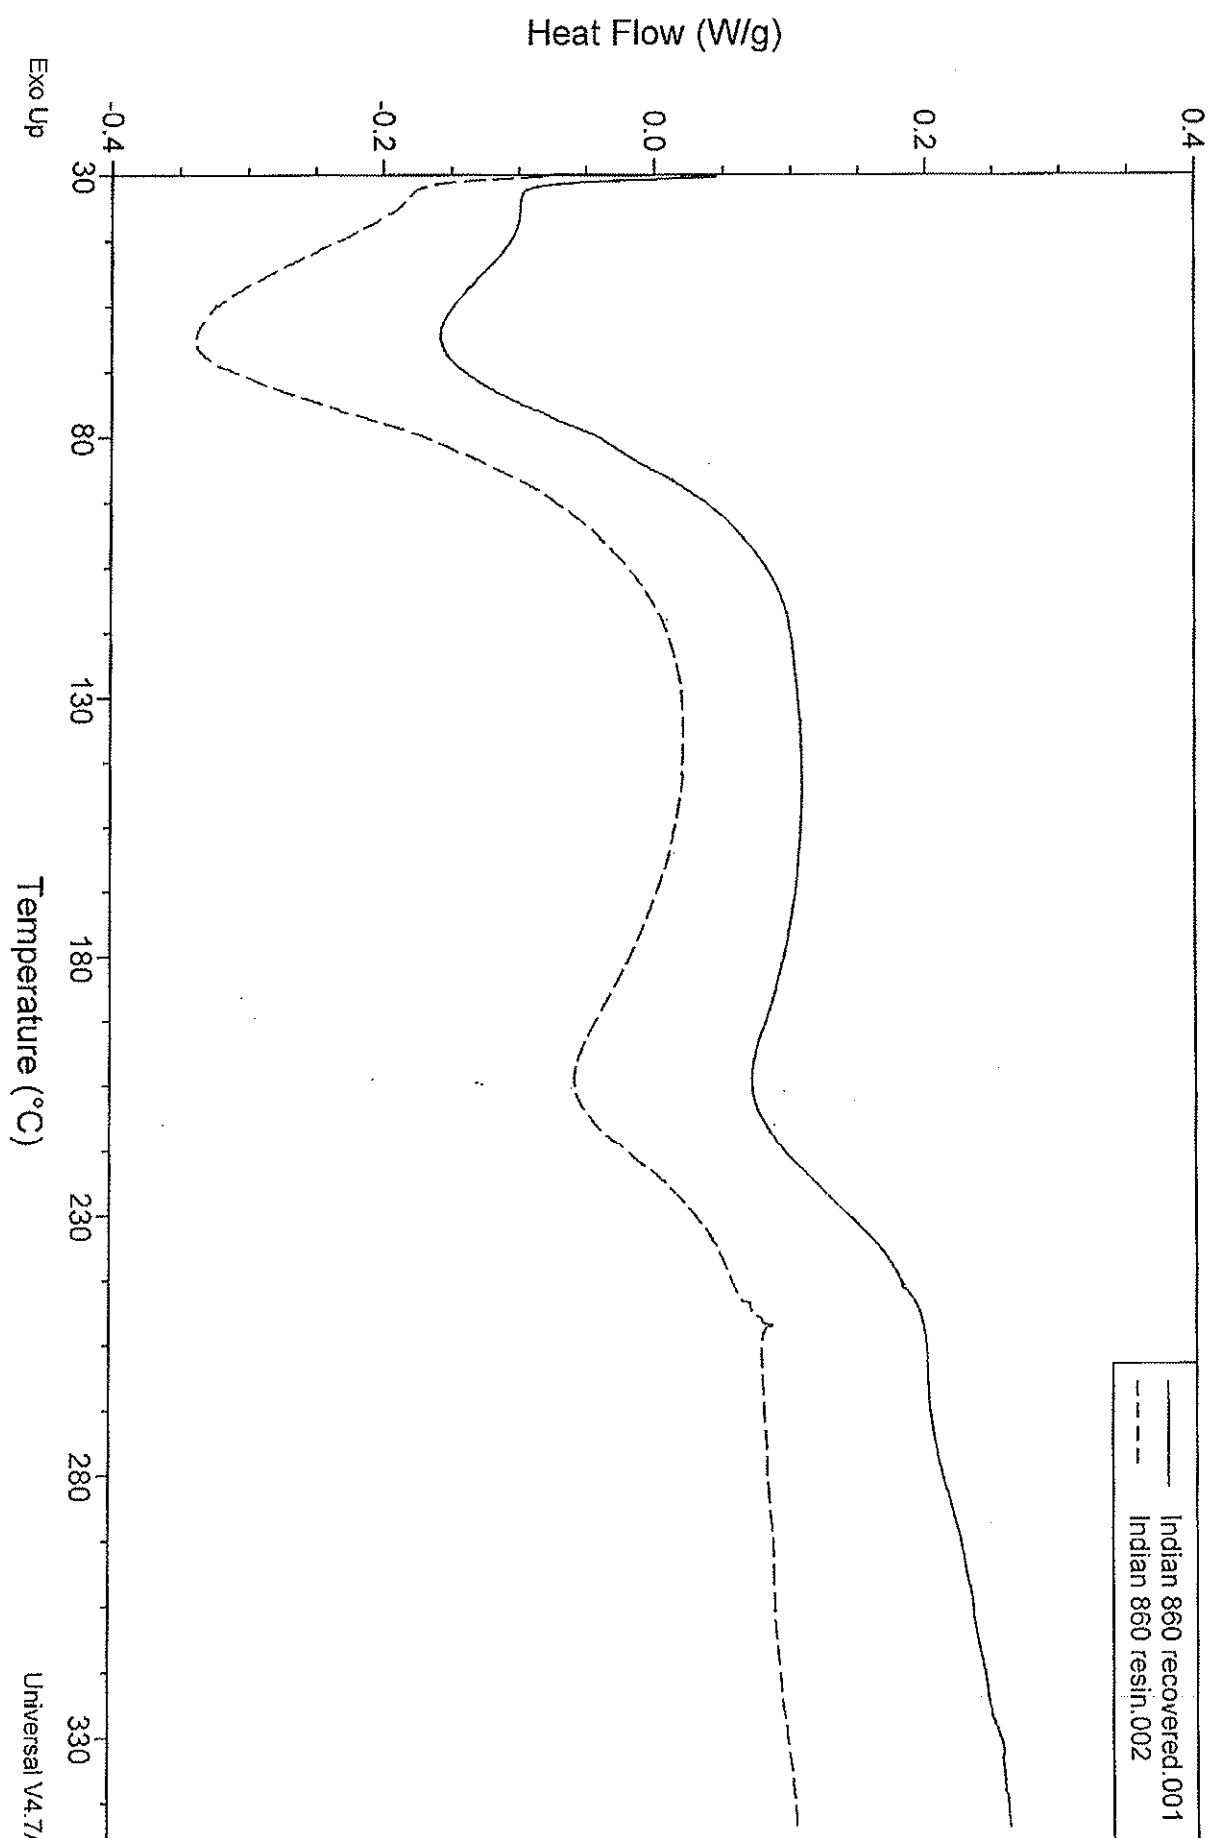

CUSTOM PHARMACEUTICAL SERVICES

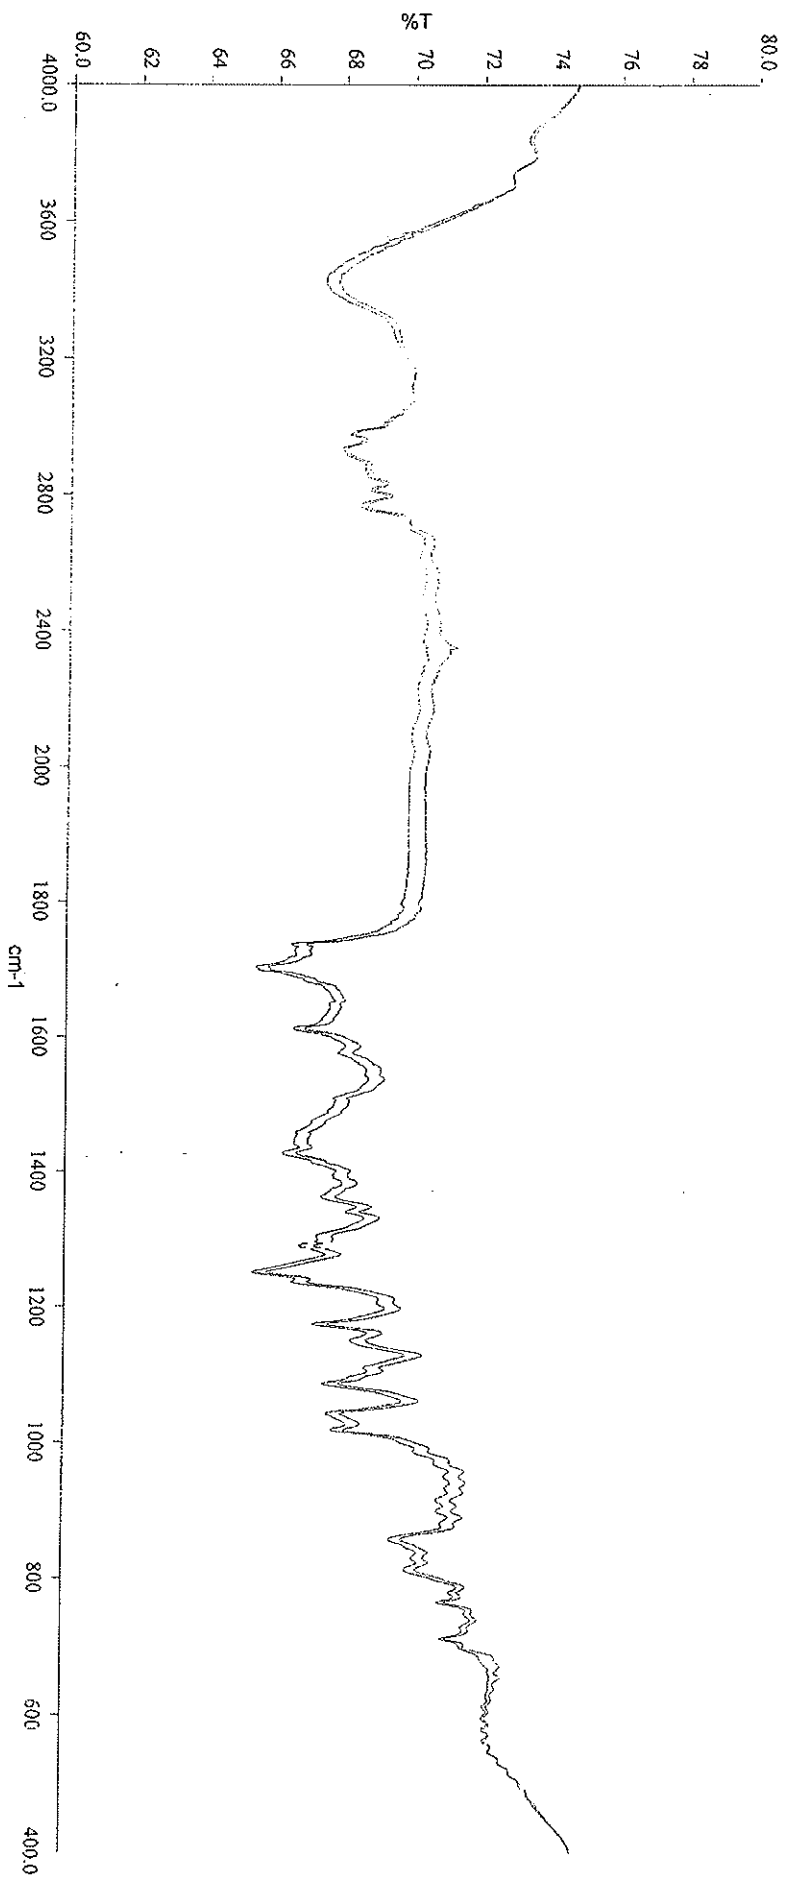

Spectrum Name

date: 9/14/2012 time: 2:21:46 PM

Indion 860 Resin Recovered

Indion 860 Resin

Correlation : 0.9988

NMR-400MHz in DMSO  
Ac.No:ME0312/2009  
Date: 21st March, 2012

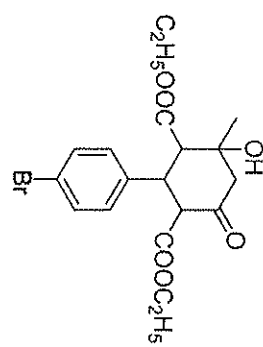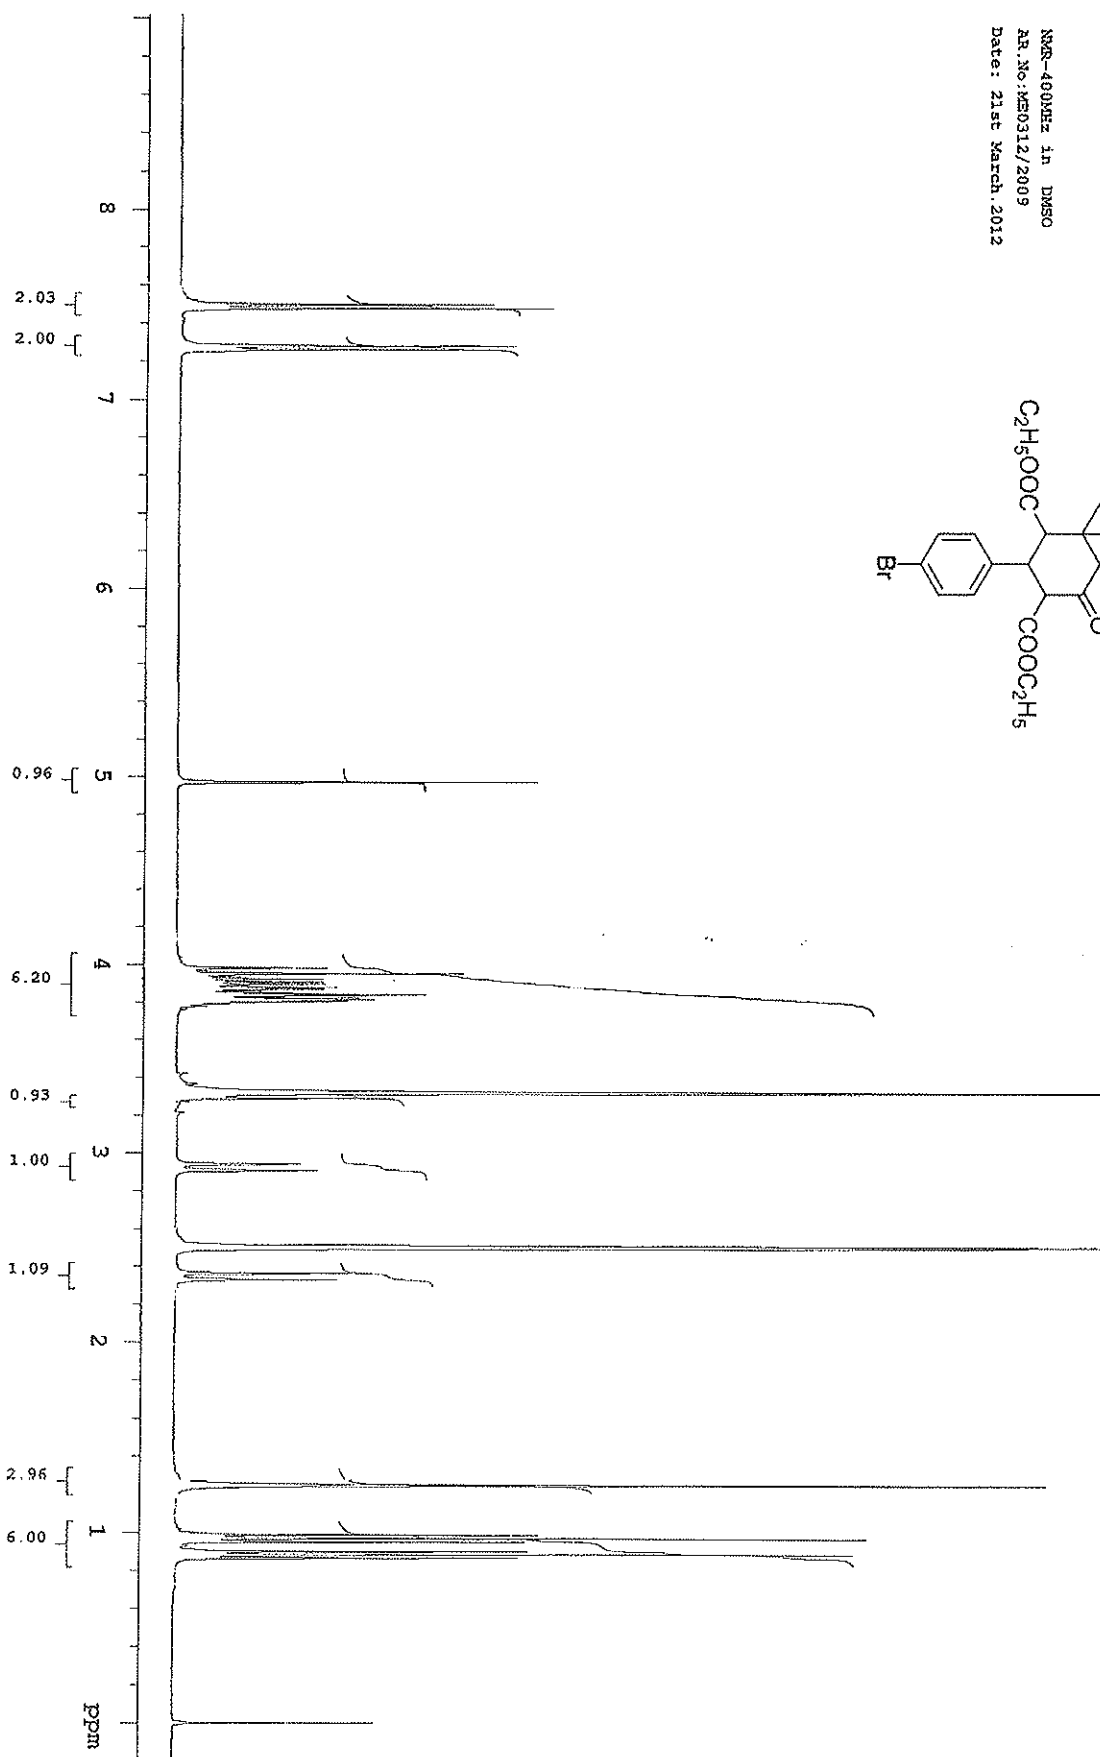

NMR-400MHz in CDCl3  
R.N.No:ME0312/2985  
Date: 30th March, 2012

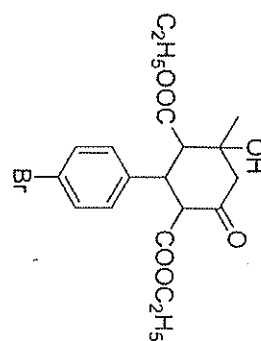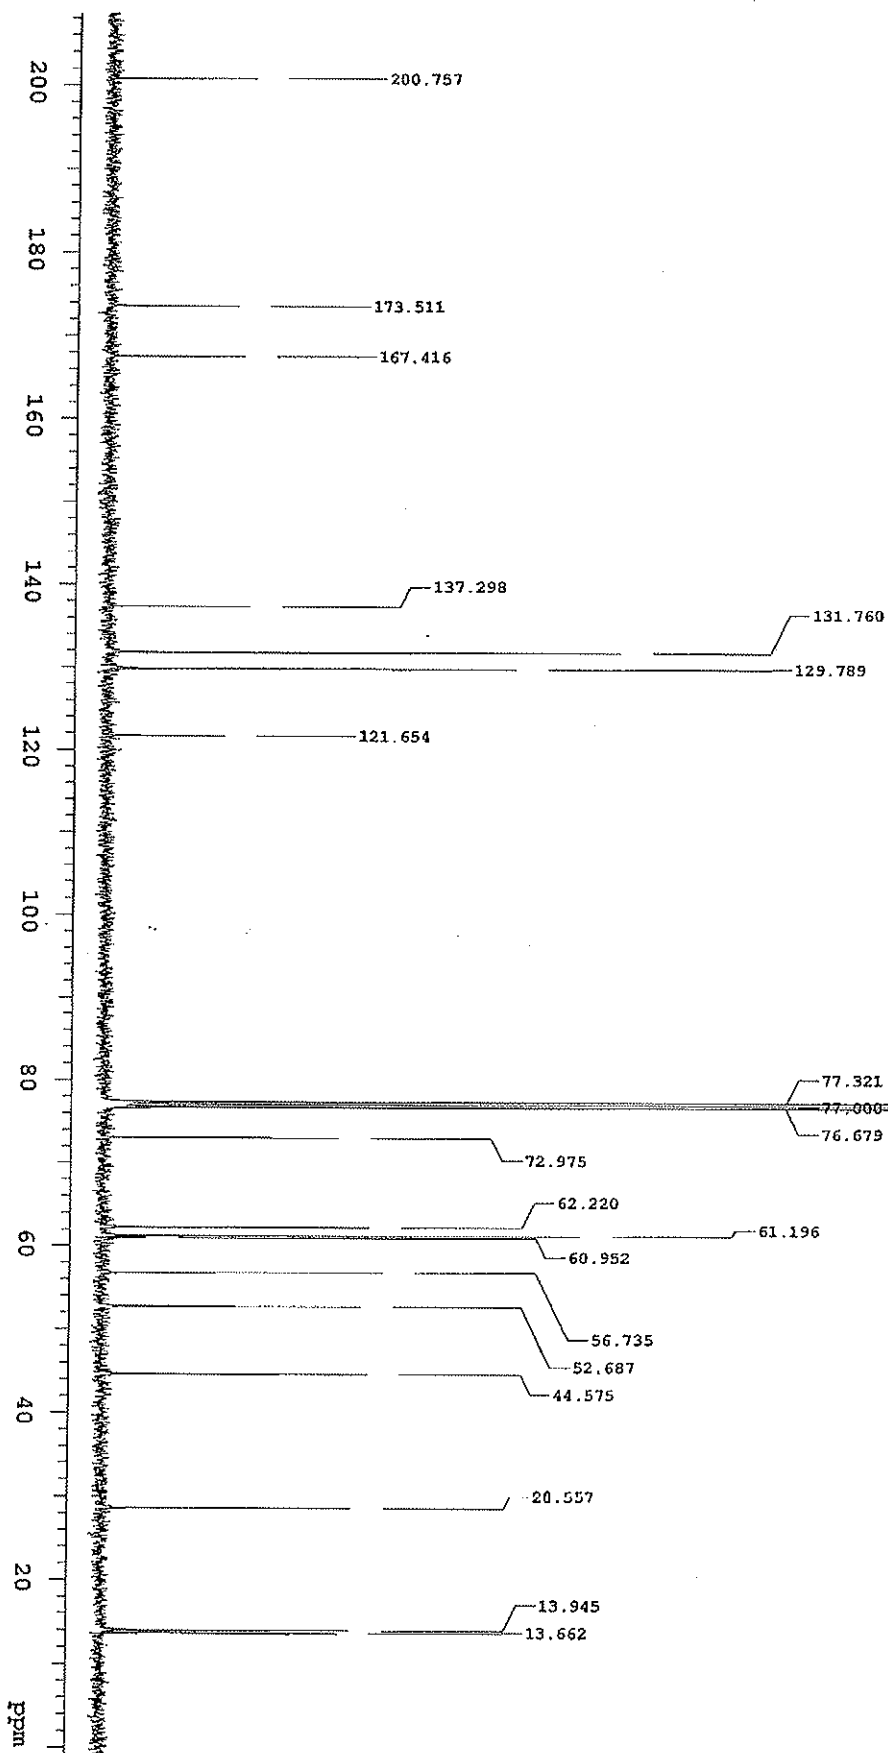

**Single Mass Analysis**

Tolerance = 5.0 PPM / DBE: min = -1.0, max = 40.0

Element prediction: Off

Number of Isotope peaks used for i-FIT = 2

Monoisotopic Mass, Even Electron Ions

69 formula(e) evaluated with 1 results within limits (up to 5 best isotopic matches for each mass)

Elements Used:

C: 0-35 H: 0-35 O: 0-10 Br: 0-1

UT0512\_027 28 (0.983) Cm (25:28)

Dr.Reddy's Laboratories Ltd, ARD,TDC-1

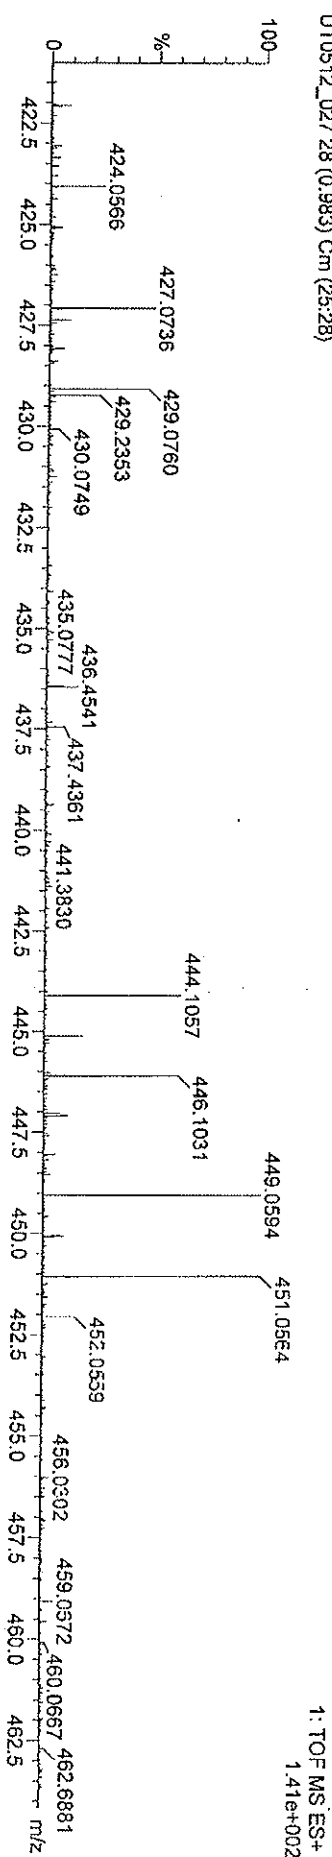

1: TOF MS ES+  
1.41e+002

| Mass     | Calc. Mass | mDa  | PPM  | DBE | i-FIT | Formula       |
|----------|------------|------|------|-----|-------|---------------|
| 427.0736 | 427.0756   | -2.0 | -4.7 | 7.5 | 1.3   | C19 H24 O6 Br |

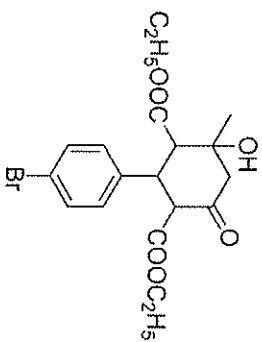

NMR-400MHz, 1% DMSO  
Ac. No: MED312/2899  
Date: 30th March, 2012

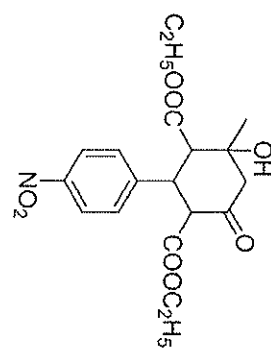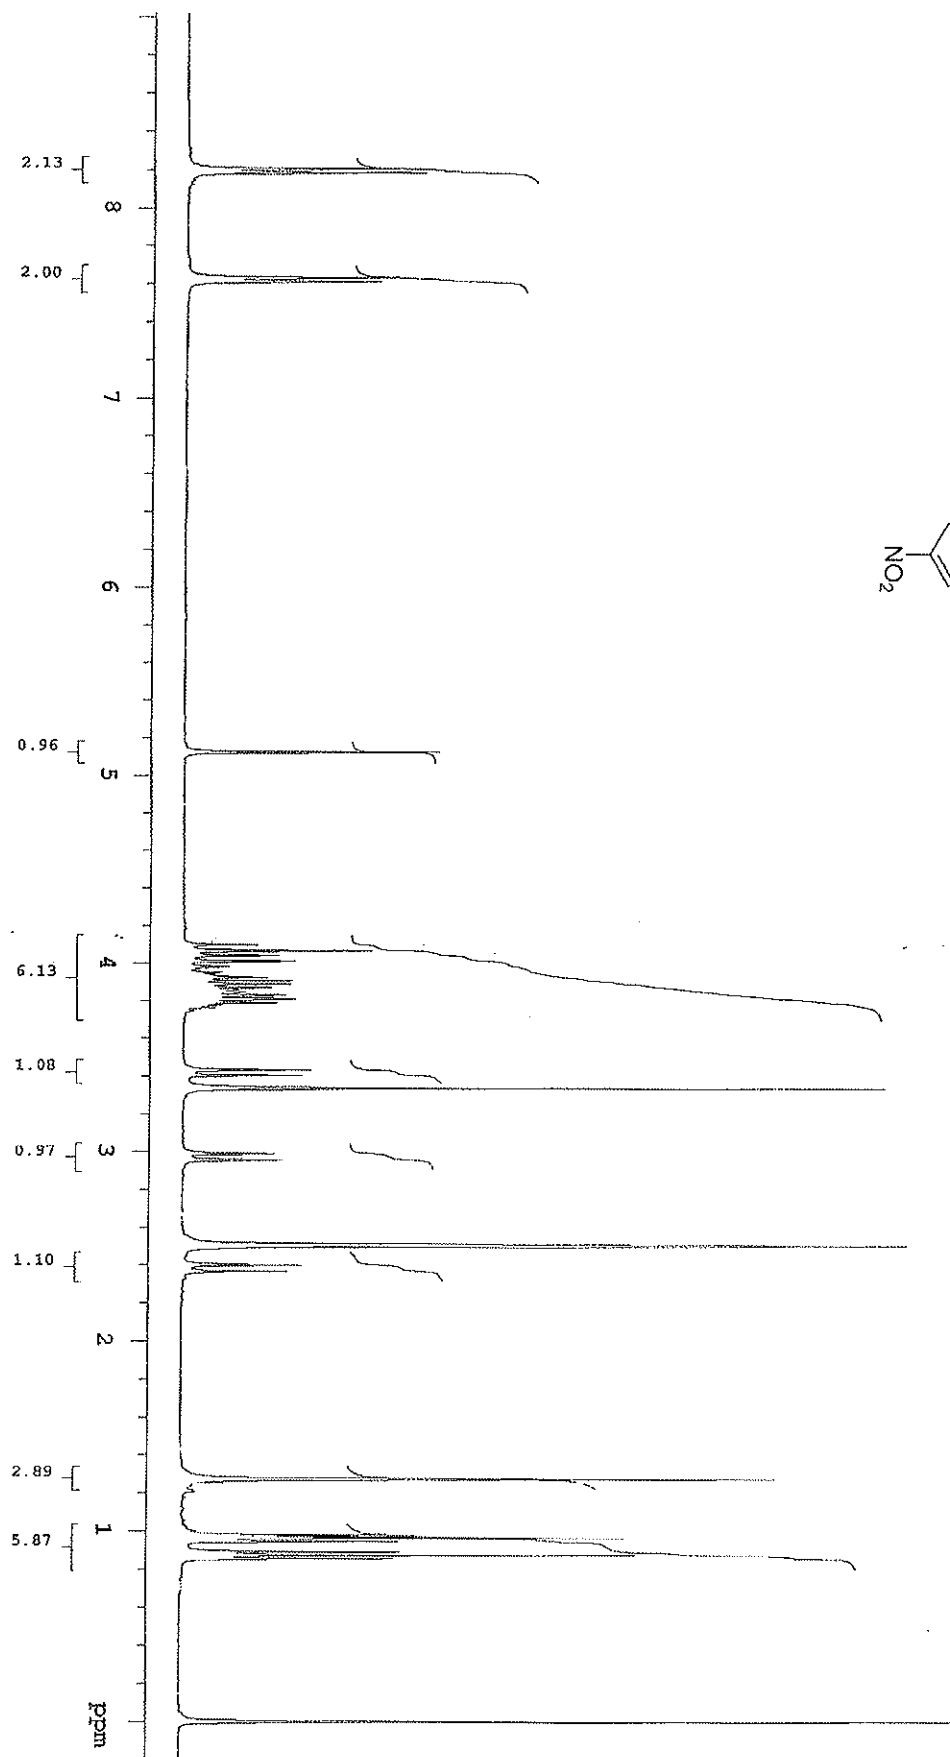

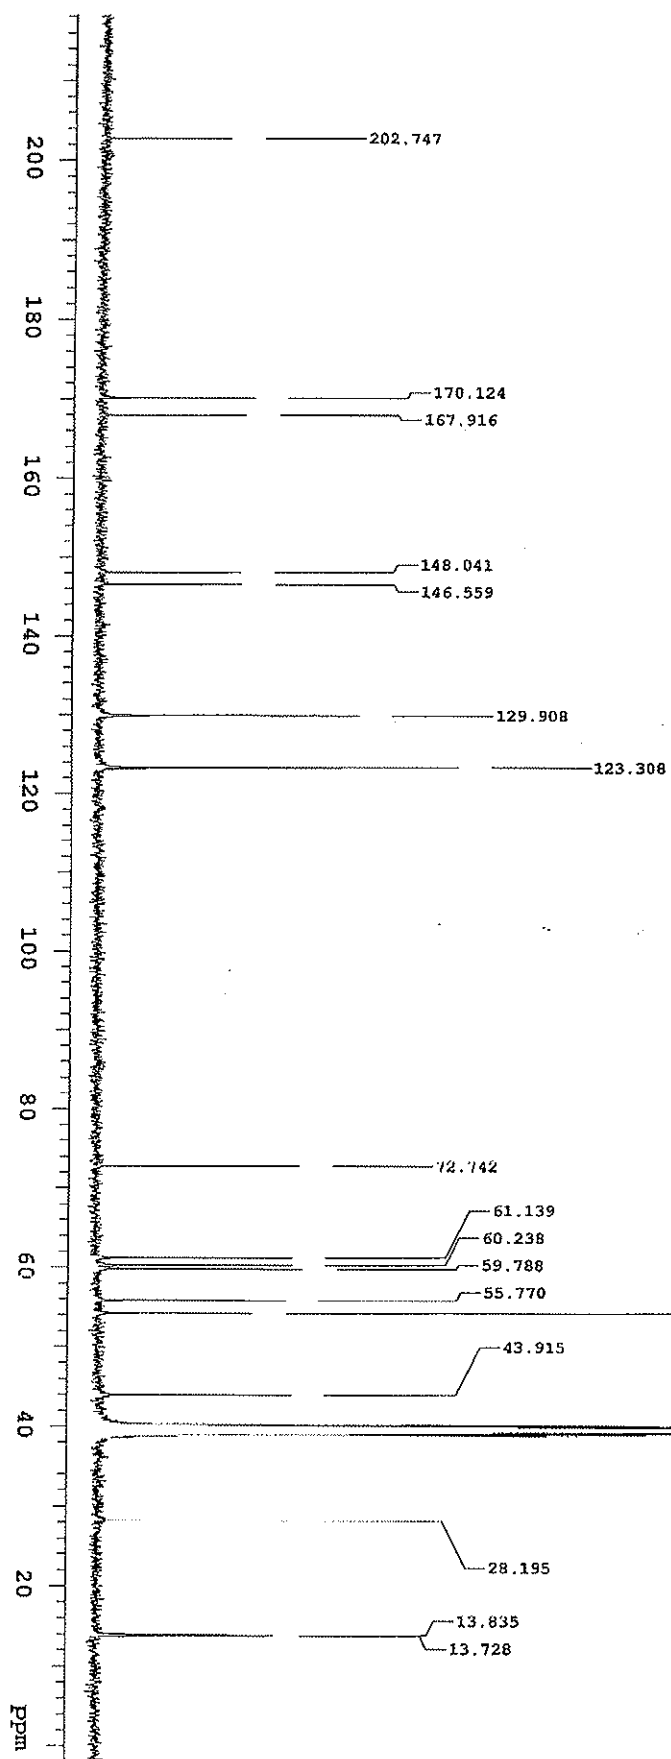

NMR-400MHz in DMSO  
AR.No:ME0712/1348  
Date:13th July, 2012

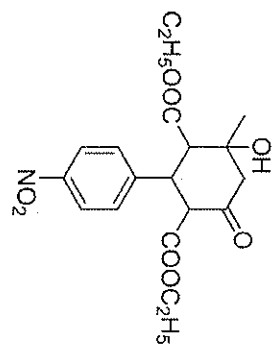



## Single Mass Analysis

Tolerance = 5.0 PPM / DBE: min = -1.0, max = 40.0

Element prediction: Off

Number of isotope peaks used for i-FIT = 2

Monoisotopic Mass, Even Electron Ions

32 formula(e) evaluated with 1 results within limits (up to 5 best isotopic matches for each mass)

Elements Used:

C: 0-25 H: 0-35 N: 0-1 O: 0-8

Dr.Reddy's Laboratories Ltd, ARD, TDC-1

UT0512\_056 5 (0.198) Cm (5:8-(1+13:16)X0.010)

1: TOF MS ES+

1.69e+003

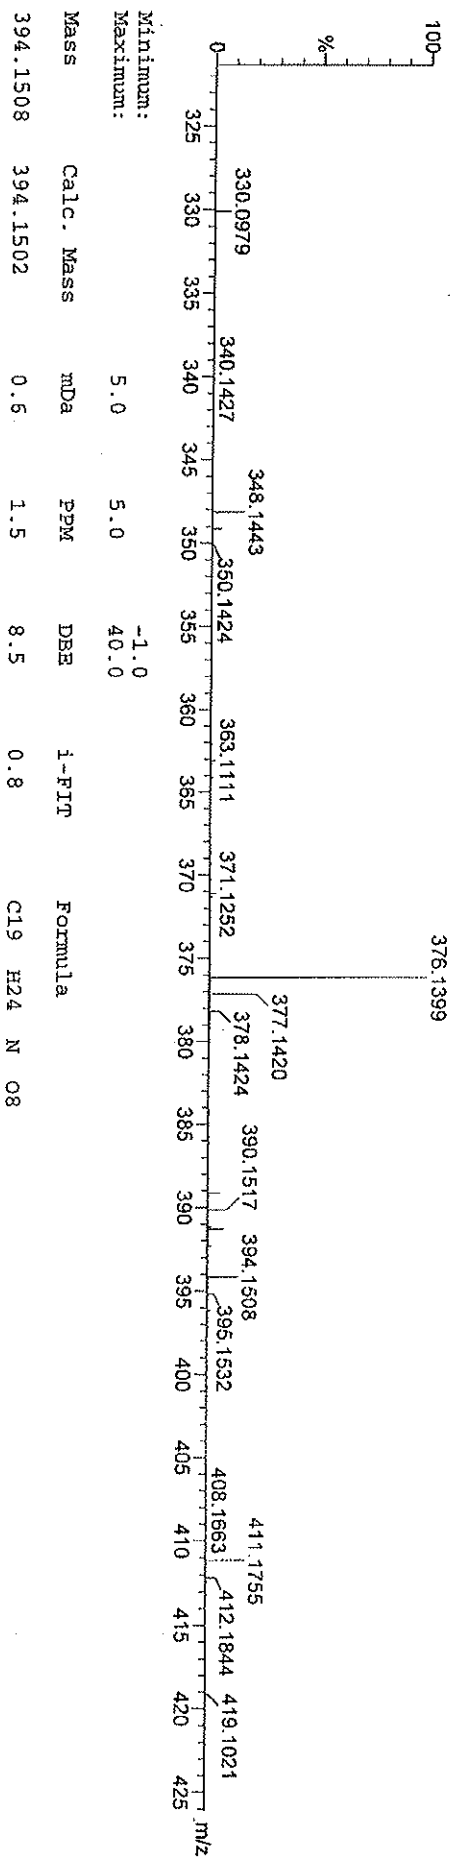Minimum: 5.0  
Maximum: 5.0  
-1.0  
40.0

| Mass     | Calc. Mass | mDa | PPM | DBE | i-FIT | Formula      |
|----------|------------|-----|-----|-----|-------|--------------|
| 394.1508 | 394.1502   | 0.6 | 1.5 | 8.5 | 0.8   | C19 H24 N O8 |

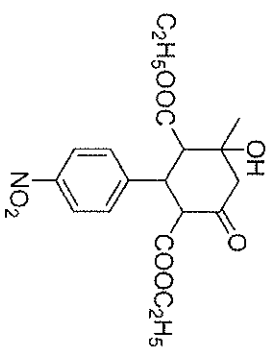

NMR-400MHz in CDCl3  
R.R.No:VE0012/1594  
Date: 18th April, 2012

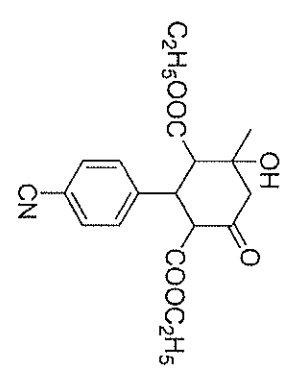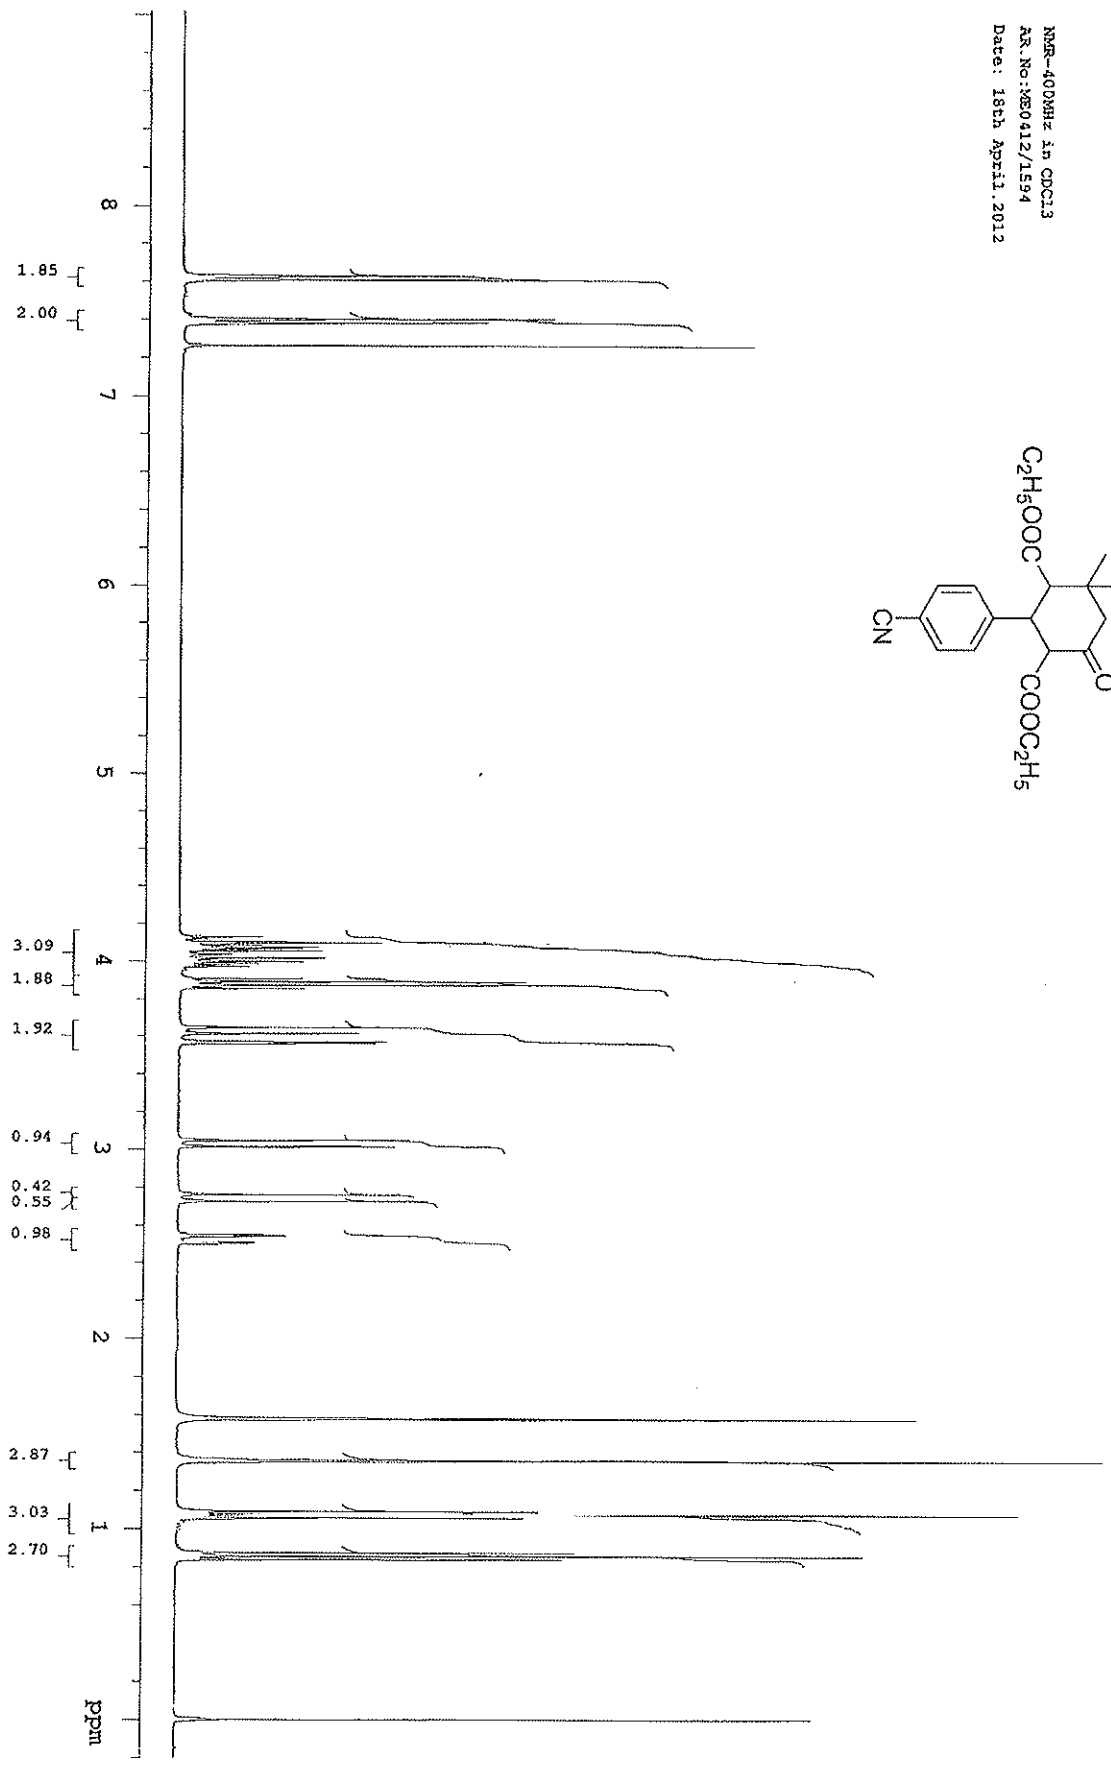

NMR-400MHz in DMSO  
Ac. No: MS0612/134  
Date: 1st June, 2012

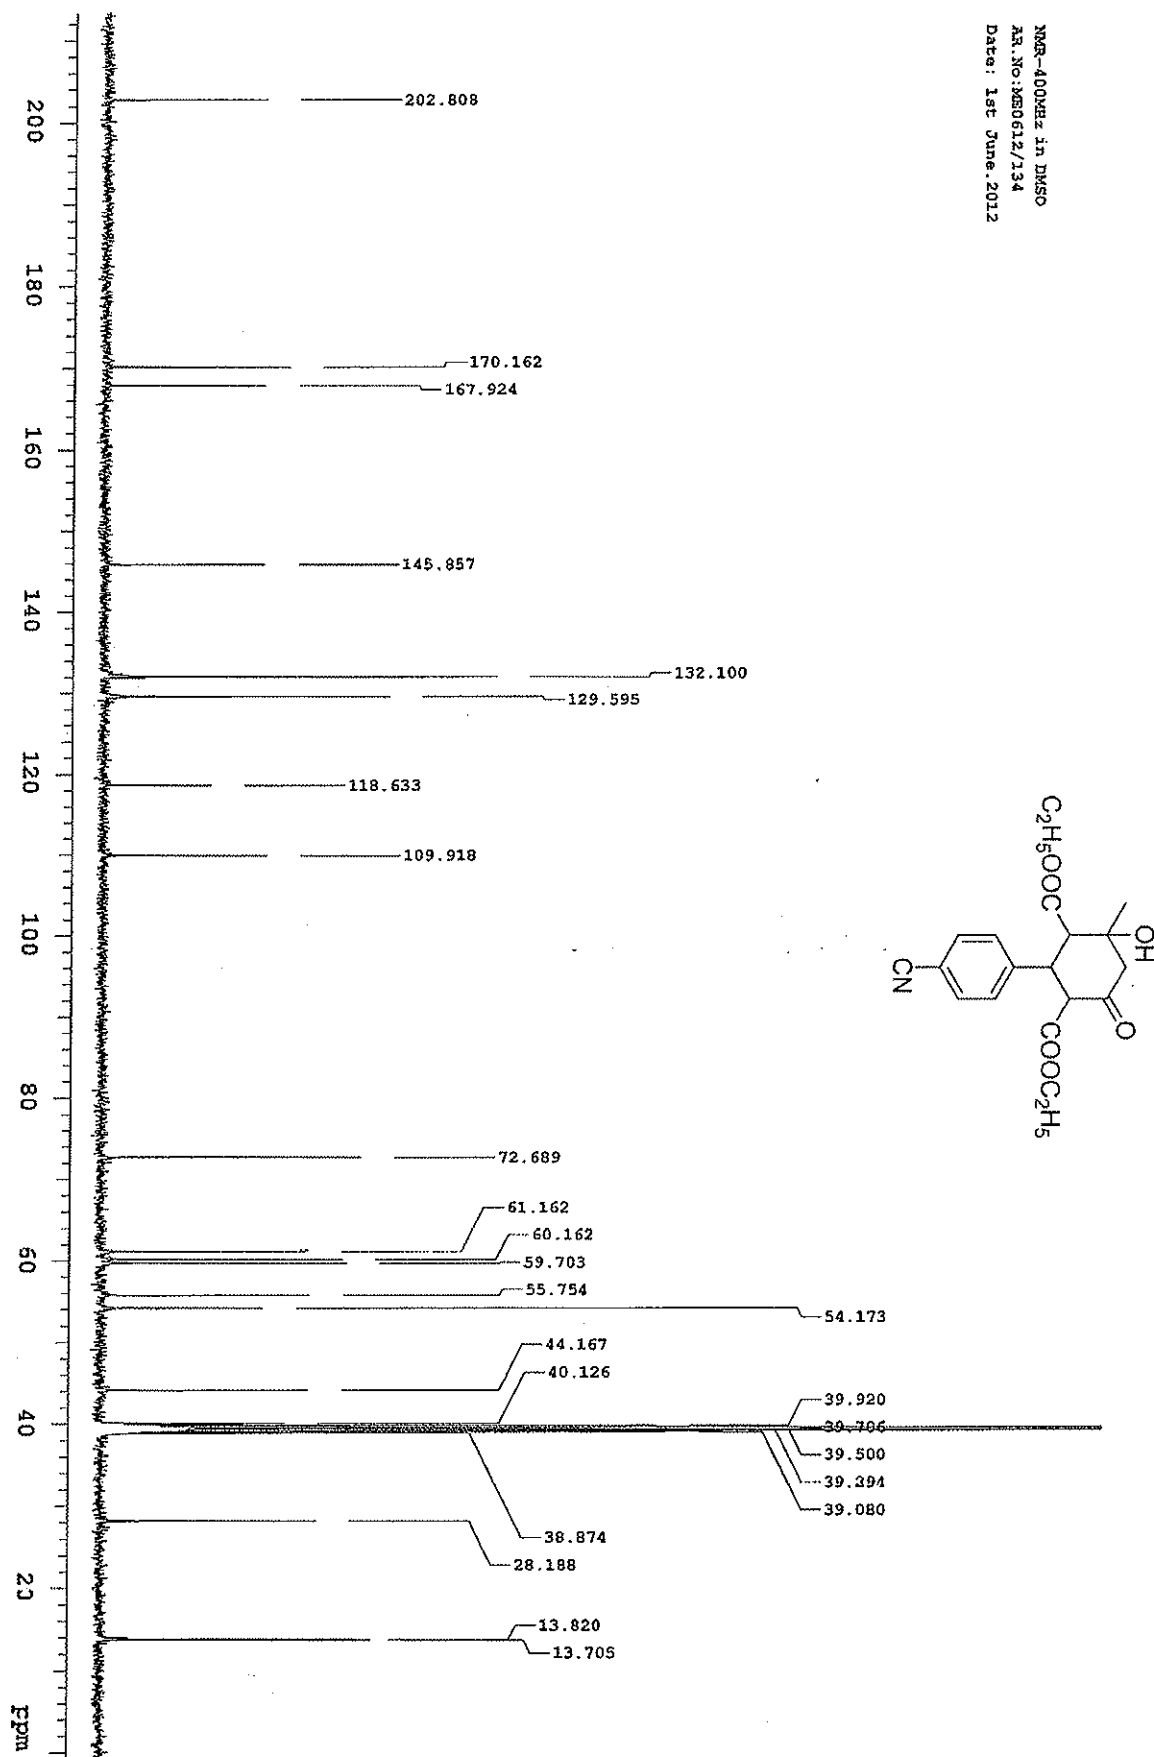

**Single Mass Analysis**

Tolerance = 5.0 PPM / DBE: min = -1.0, max = 40.0  
 Element prediction: Off  
 Number of isotope peaks used for i-FIT = 2

Monoisotopic Mass, Even Electron Ions  
 37 formula(e) evaluated with 1 results within limits (up to 5 best isotopic matches for each mass)  
 Elements Used:  
 C: 0-30 H: 0-30 N: 0-1 O: 0-6

Dr.Reddy's Laboratories Ltd, ARD, TDC-1

LT0512\_049 4 (0.138) Cm (4:5)

1: TOF MS ES+  
 6.08e+002

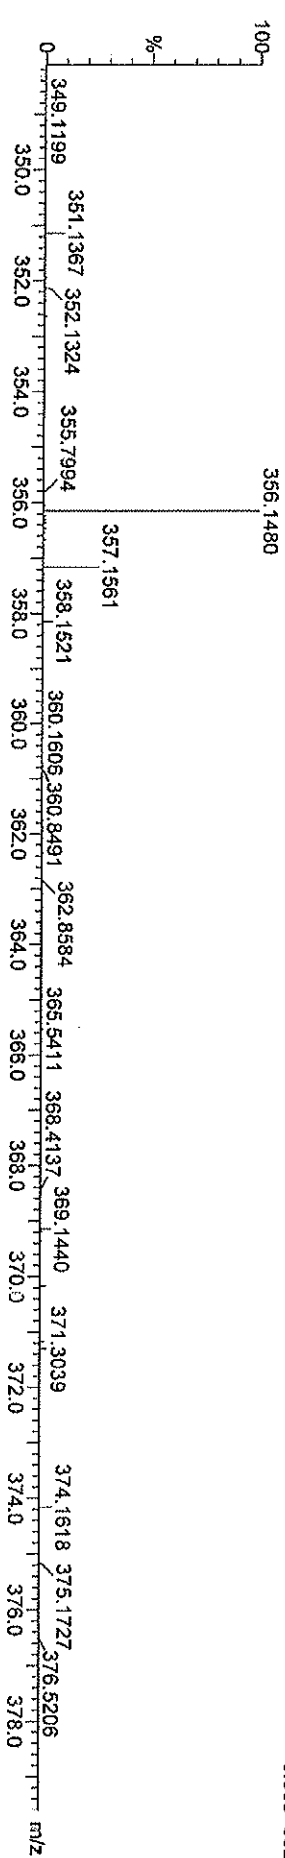

Minimum: 5.0  
 Maximum: 5.0  
 -1.0  
 40.0

| Mass     | Calc. Mass | mDa | PPM | DBE | i-FIT | Formula      |
|----------|------------|-----|-----|-----|-------|--------------|
| 374.1618 | 374.1604   | 1.4 | 3.7 | 9.5 | 0.3   | C20 H24 N O6 |

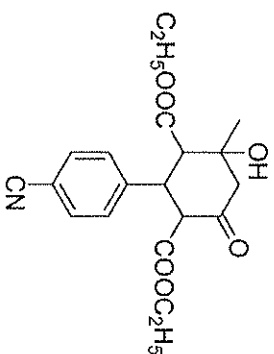

### SAMPLE INFORMATION

|                  |                 |                   |                         |
|------------------|-----------------|-------------------|-------------------------|
| Sample_Type      | : Unknown       | Acquired By       | : System                |
| Injection Volume | : 63            | Date Acquired     | : 10/3/2012 7:15:37 PM  |
| Vial no          | : 10.00 ul      | Channel Name      | : PDA 254.0 nm          |
| Run Time         | : 40.00 Minutes | Acq Method Set    | : CHIRAL                |
| System Name      | : HPLC_005_PDA  | Date Processed    | : 10/4/2012 11:58:05 AM |
| Sample Set Name  | : 12100302      | Project Name      | : Alliance_005_OCT_2012 |
| Injection #      | : 1             | Processing Method | : H                     |

### HPLC CONDITIONS

Column : chiral pak AD-H(250\*4.6)mm5µm  
Mobile\_phase : Ethanol:MeOH:DEA(800:200:1)  
Diluent : DCM  
Flow rate : 0.5 mL/min,  
Column temp : 27 °C, inj vol:5µl  
Wavelength : 254.0 nm

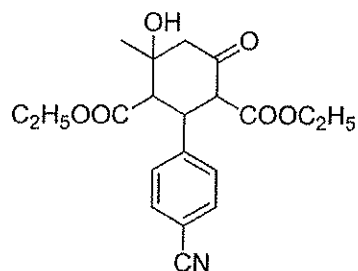

### Auto-Scaled Chromatogram

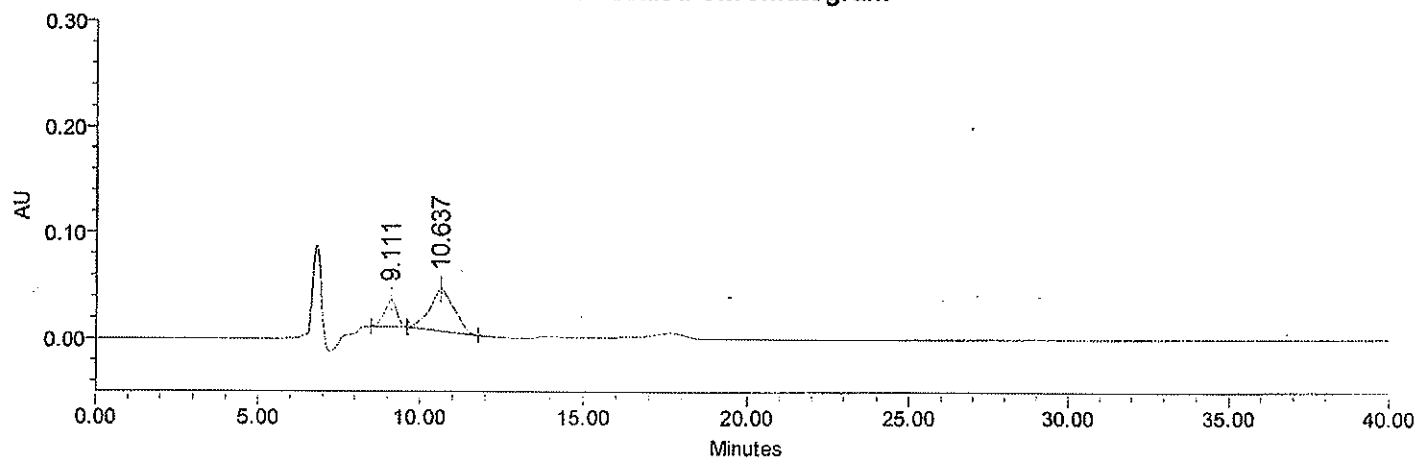

### Peak Results

| Name | RT     | Area    | % Area |
|------|--------|---------|--------|
| 1    | 9.111  | 653062  | 23.96  |
| 2    | 10.637 | 2072206 | 76.04  |

NMR-400MHz in CDCl3  
Ac.No:MR0712/818  
Date: 09th July, 2012

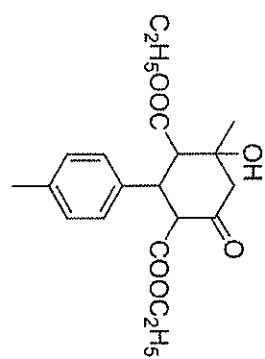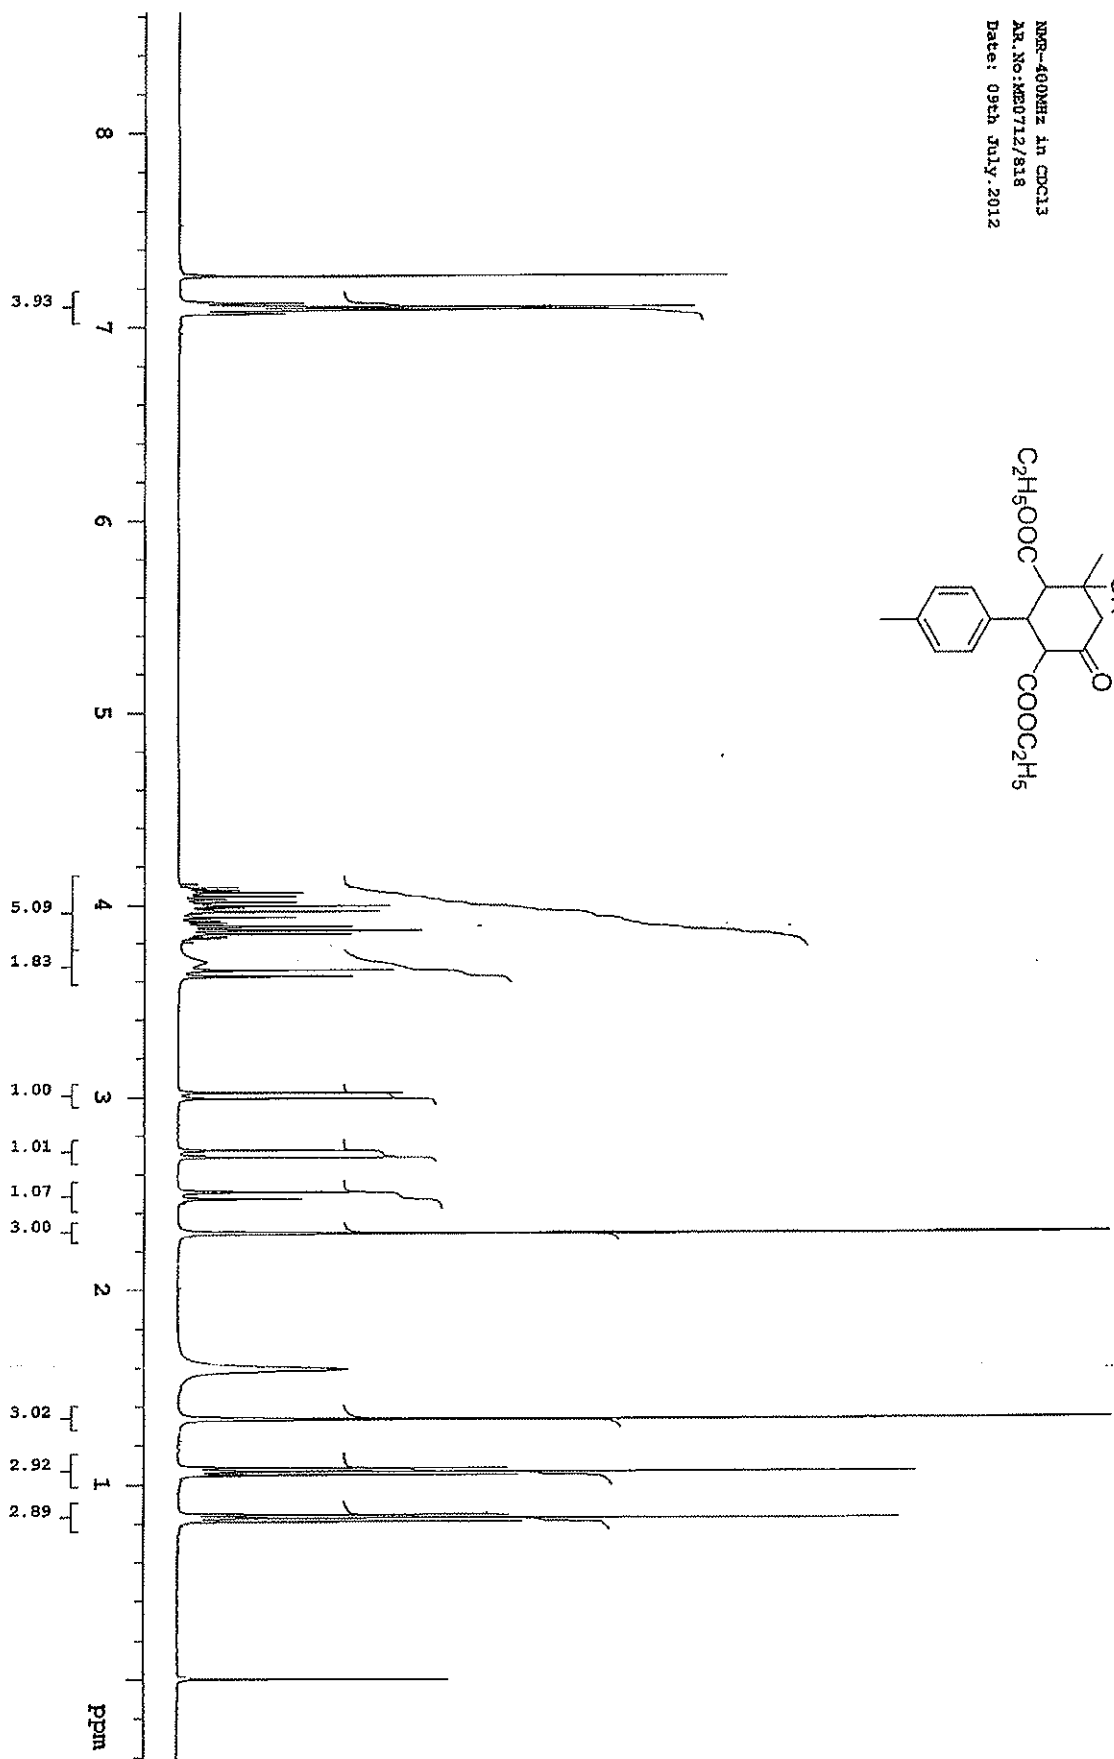

NMR-400MHz in DMSO  
RR.No:ME0712/1346  
Date:13th July,2012

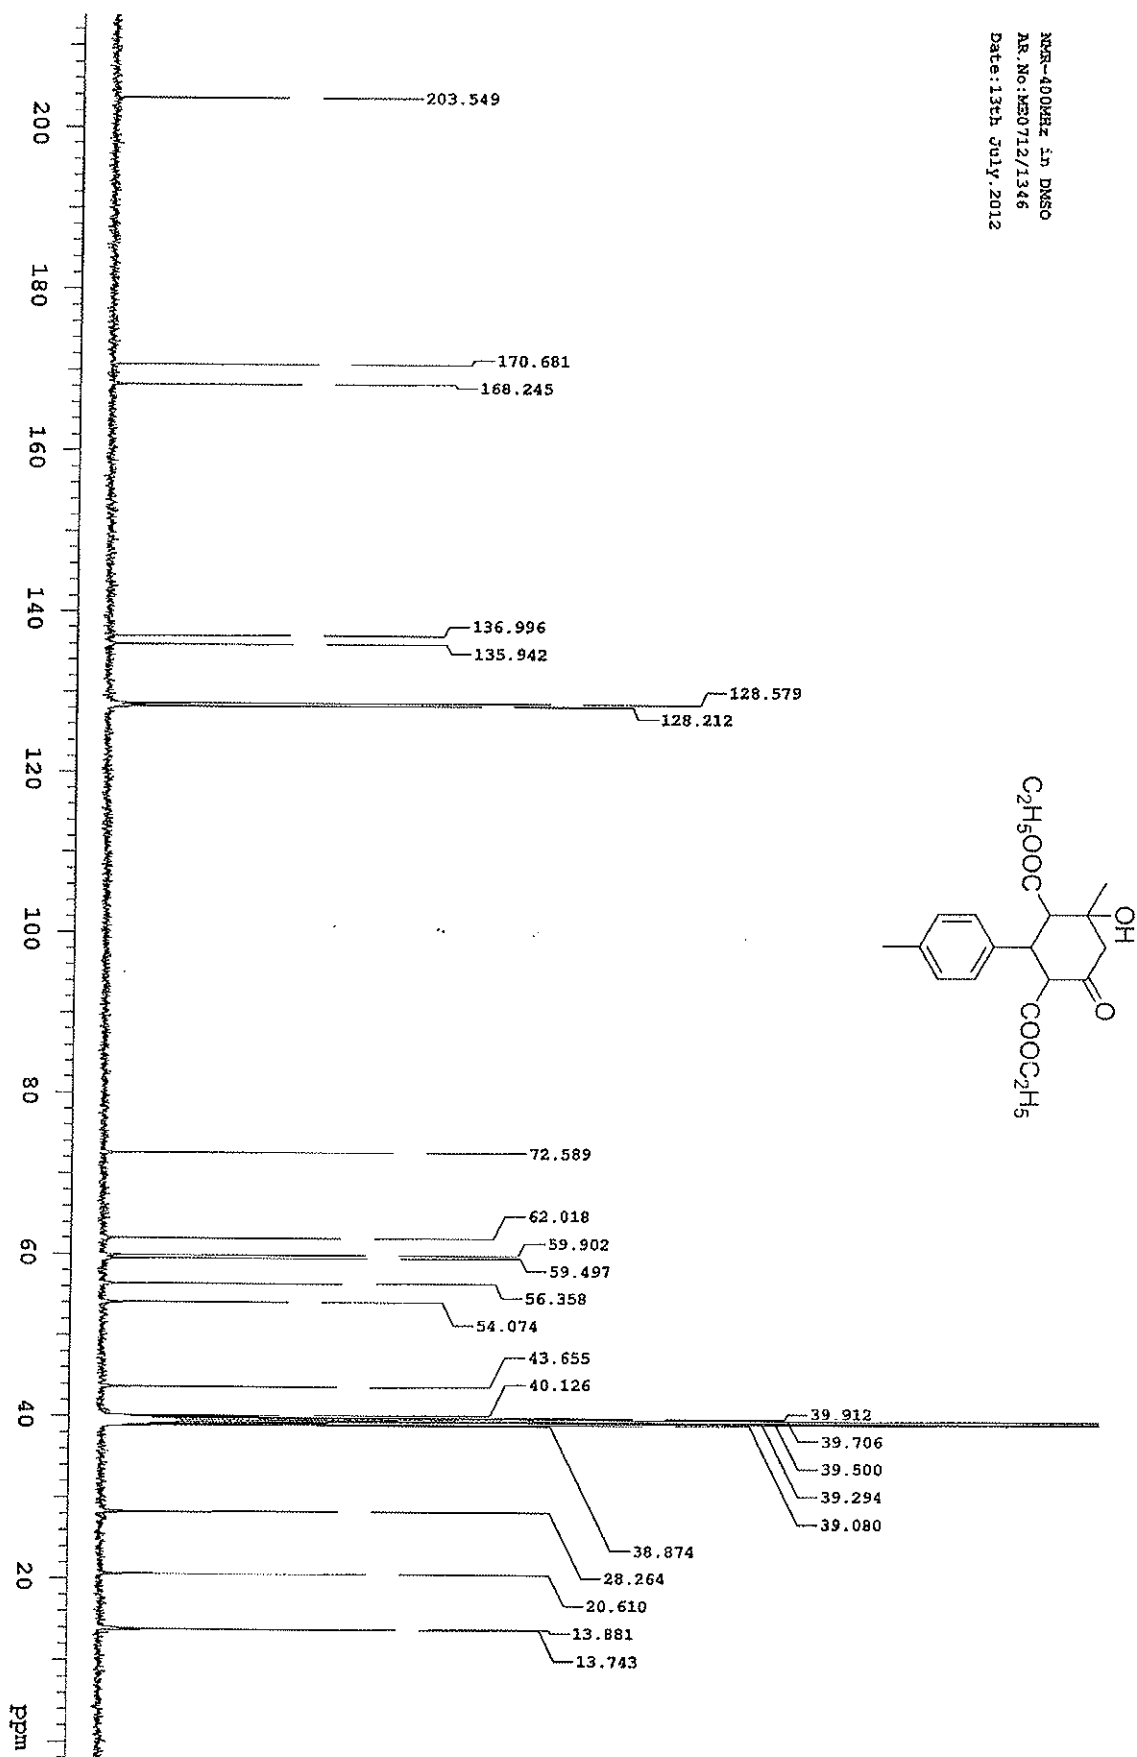

### Elemental Composition Report

#### Single Mass Analysis

Tolerance = 5.0 PPM / DBE: min = -1.0, max = 40.0  
 Element prediction: Off  
 Number of isotope peaks used for i-FIT = 2

Monoisotopic Mass, Even Electron Ions  
 28 formula(e) evaluated with 1 results within limits (up to 5 best isotopic matches for each mass)  
 Elements Used:  
 C: 0-25 H: 0-35 O: 0-10

Dr.Reddy's Laboratories Ltd, ARD, TDC-1

UT0512\_021 21 (0.762) Cm (17:27-2:8x0.010)

1: TOF MS ES+  
 2.03e+004

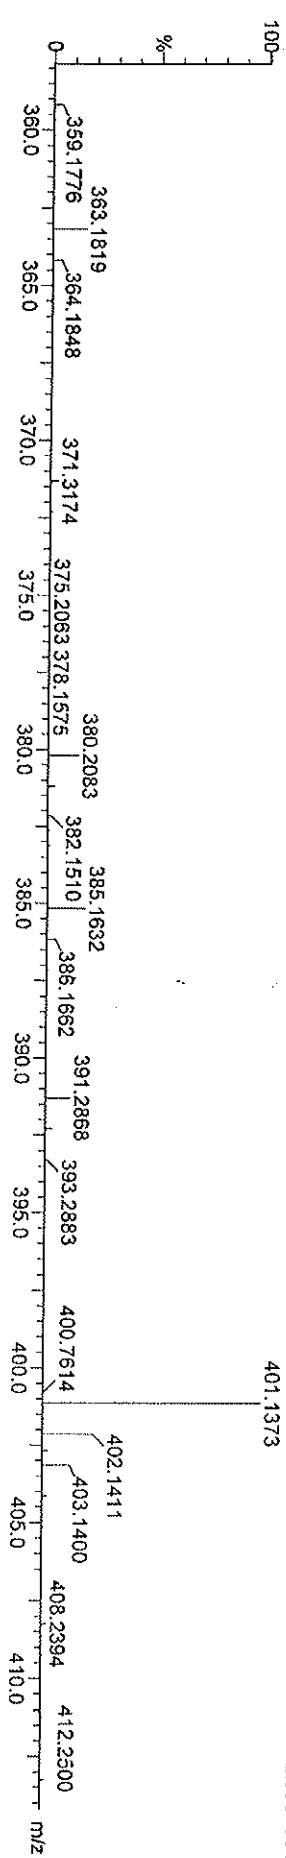

Minimum: 5.0  
 Maximum: 5.0  
 -1.0  
 40.0

| Mass     | Calc. Mass | MDa | PPM | DBE | i-FIT | Formula    |
|----------|------------|-----|-----|-----|-------|------------|
| 363.1819 | 363.1808   | 1.1 | 3.0 | 7.5 | 1.9   | C20 H27 O6 |

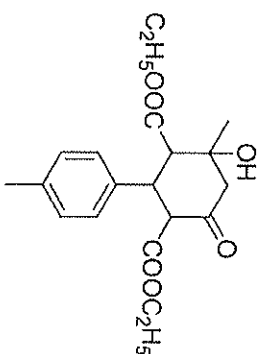



<sup>1</sup>H NMR-400MHz in DMSO  
Ac. No: ME0712/1800  
Date: 19th July, 2012

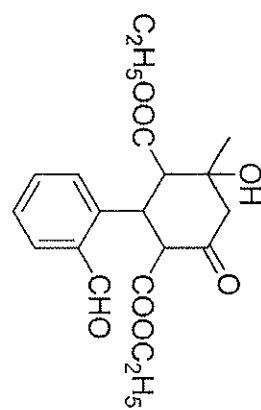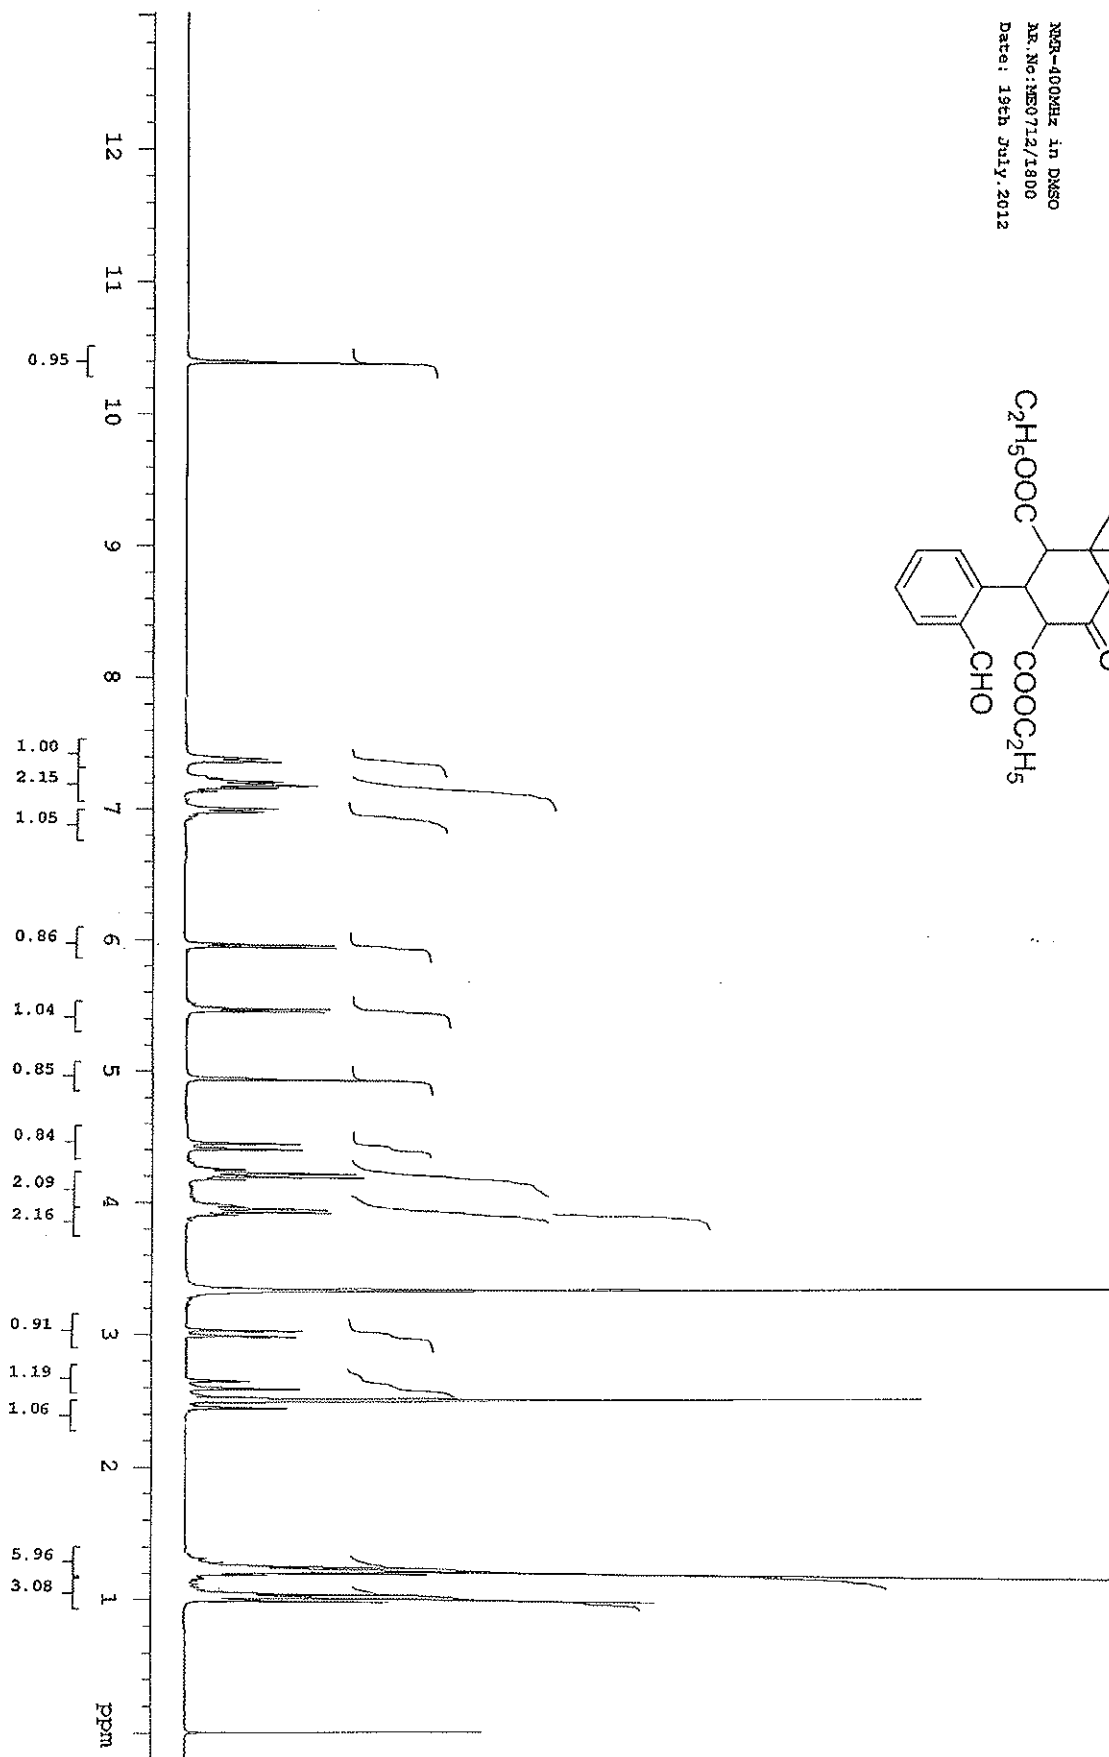

NMR-400MHz in CDCl3  
Ac.No:ME0612/2953  
Date:29th June,2012

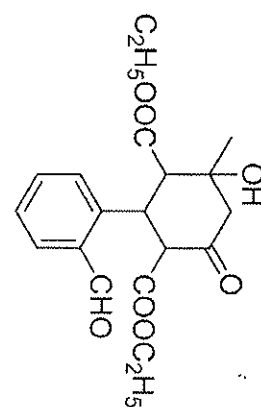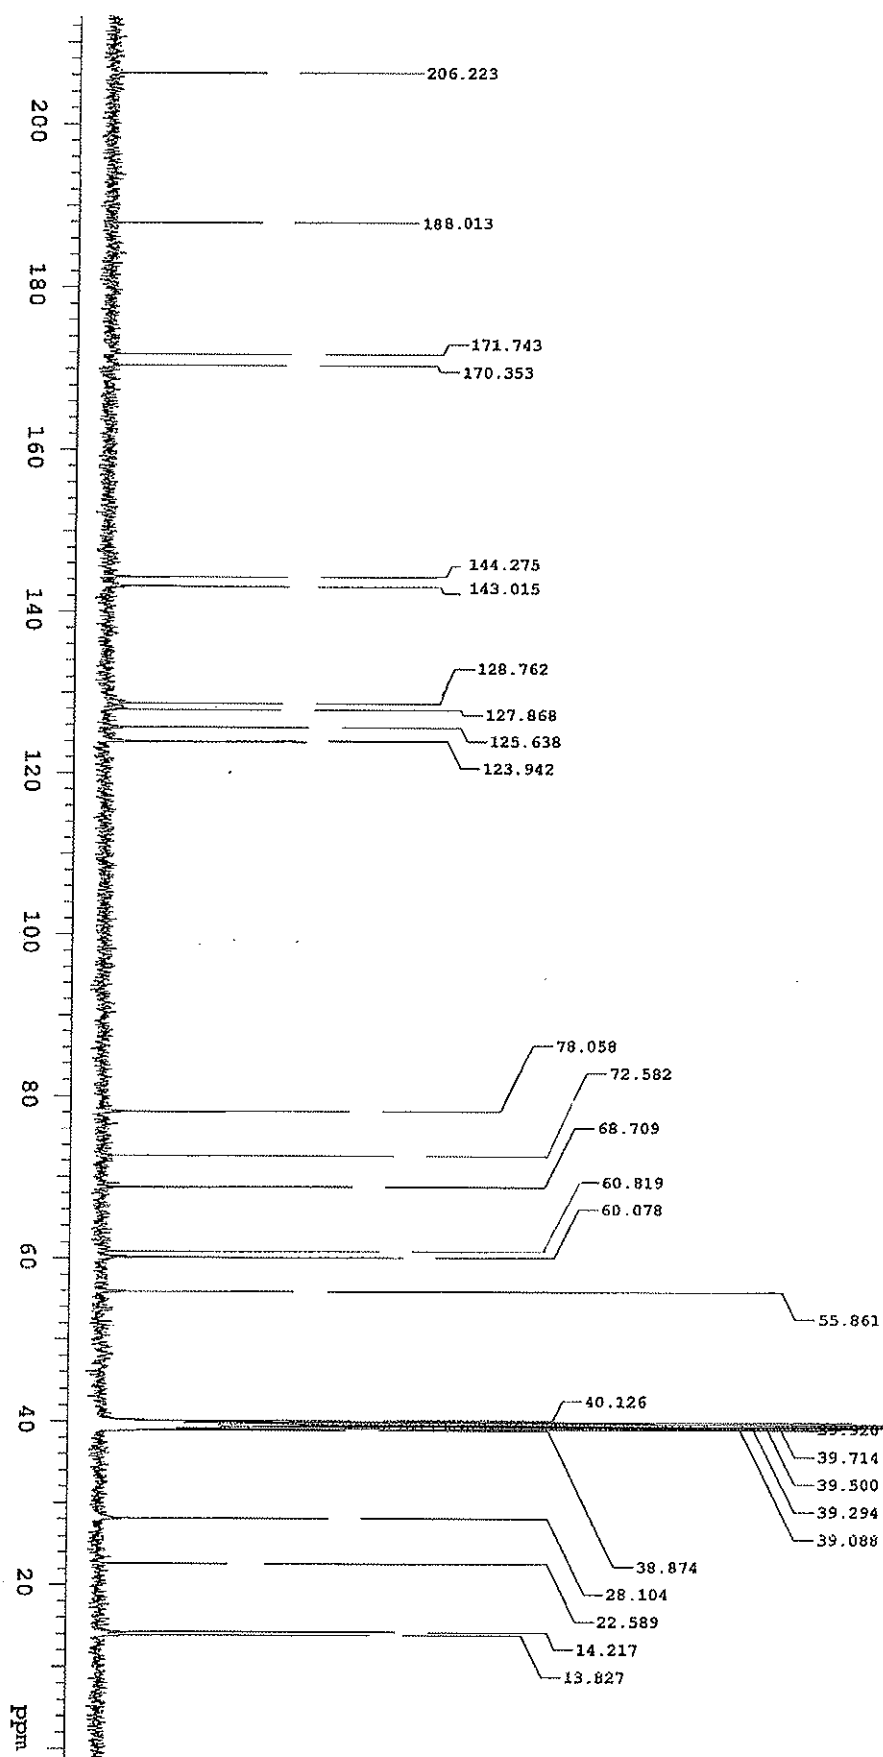

## Single Mass Analysis

Tolerance = 5.0 PPM / DBE: min = -1.0, max = 40.0

Element prediction: Off

Number of isotopic peaks used for i-FIT = 2

Monoisotopic Mass, Even Electron Ions

22 formula(e) evaluated with 1 results within limits (up to 5 best isotopic matches for each mass)

Elements Used:

C: 0-25 H: 0-35 O: 0-10

Dr.Reddy's Laboratories Ltd, ARQ, TDC-1

UT0512\_024 24 (0.841) Cm (21:29-5:13x0.010)

1: TOF MS ES+

5.94e+002

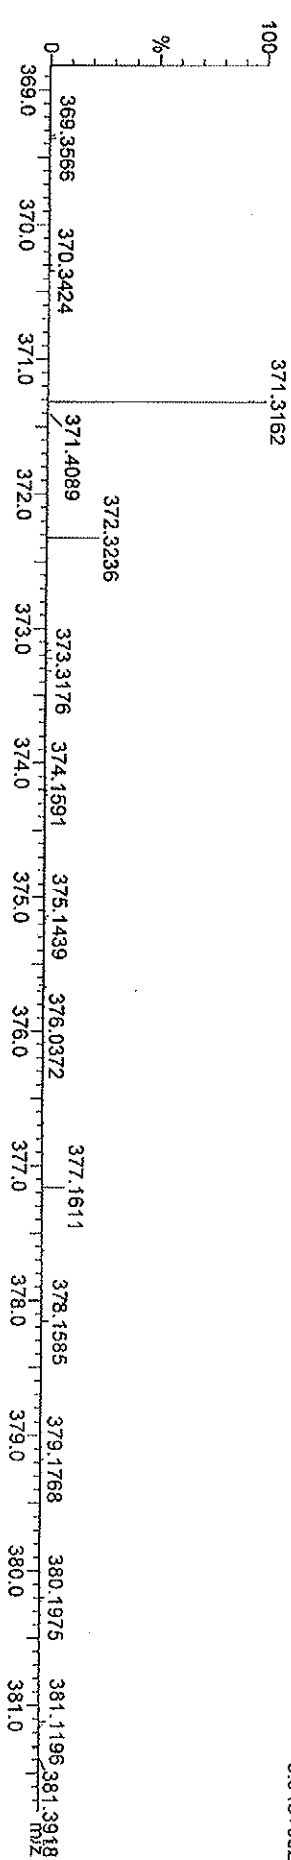

Minimum:

Maximum: 5.0

5.0

-1.0

40.0

| Mass     | Calc. Mass | MDA | PPM | DBE | i-FIT | Formula    |
|----------|------------|-----|-----|-----|-------|------------|
| 377.1611 | 377.1600   | 1.1 | 2.9 | 8.5 | 0.5   | C20 H25 O7 |

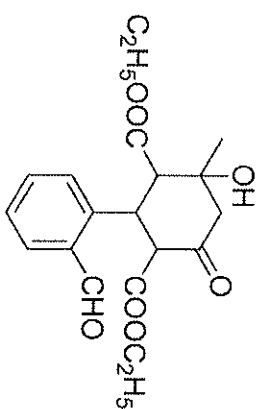

NMR-400MHz in DMSO  
AR.No:ME0512/2452  
Date: 24th May 2012

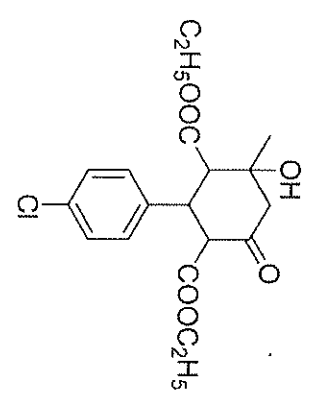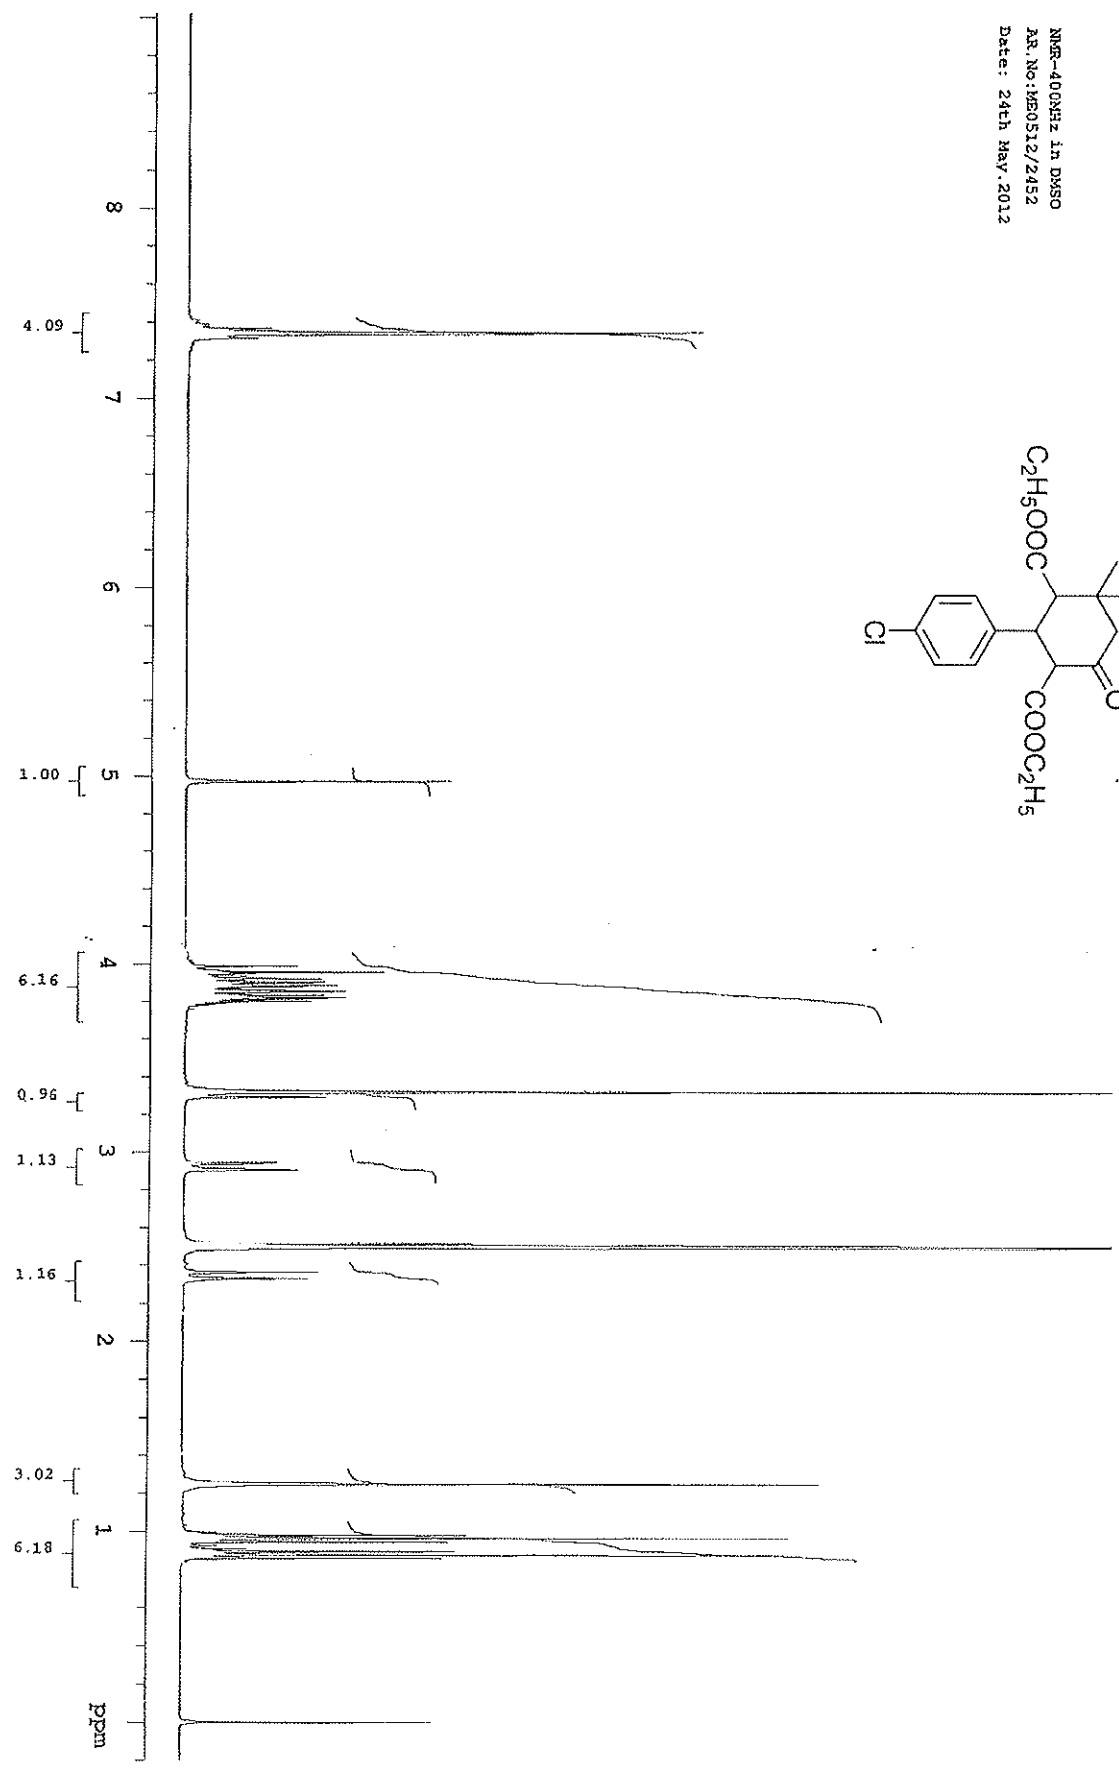

NMR-400MHz in DMSO  
Ac.No:ME0612/2812  
Date: 28th June, 2012

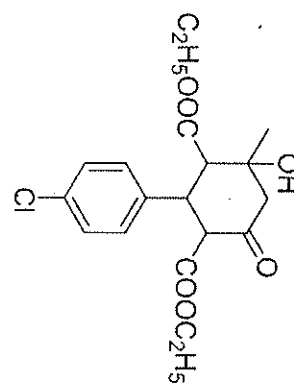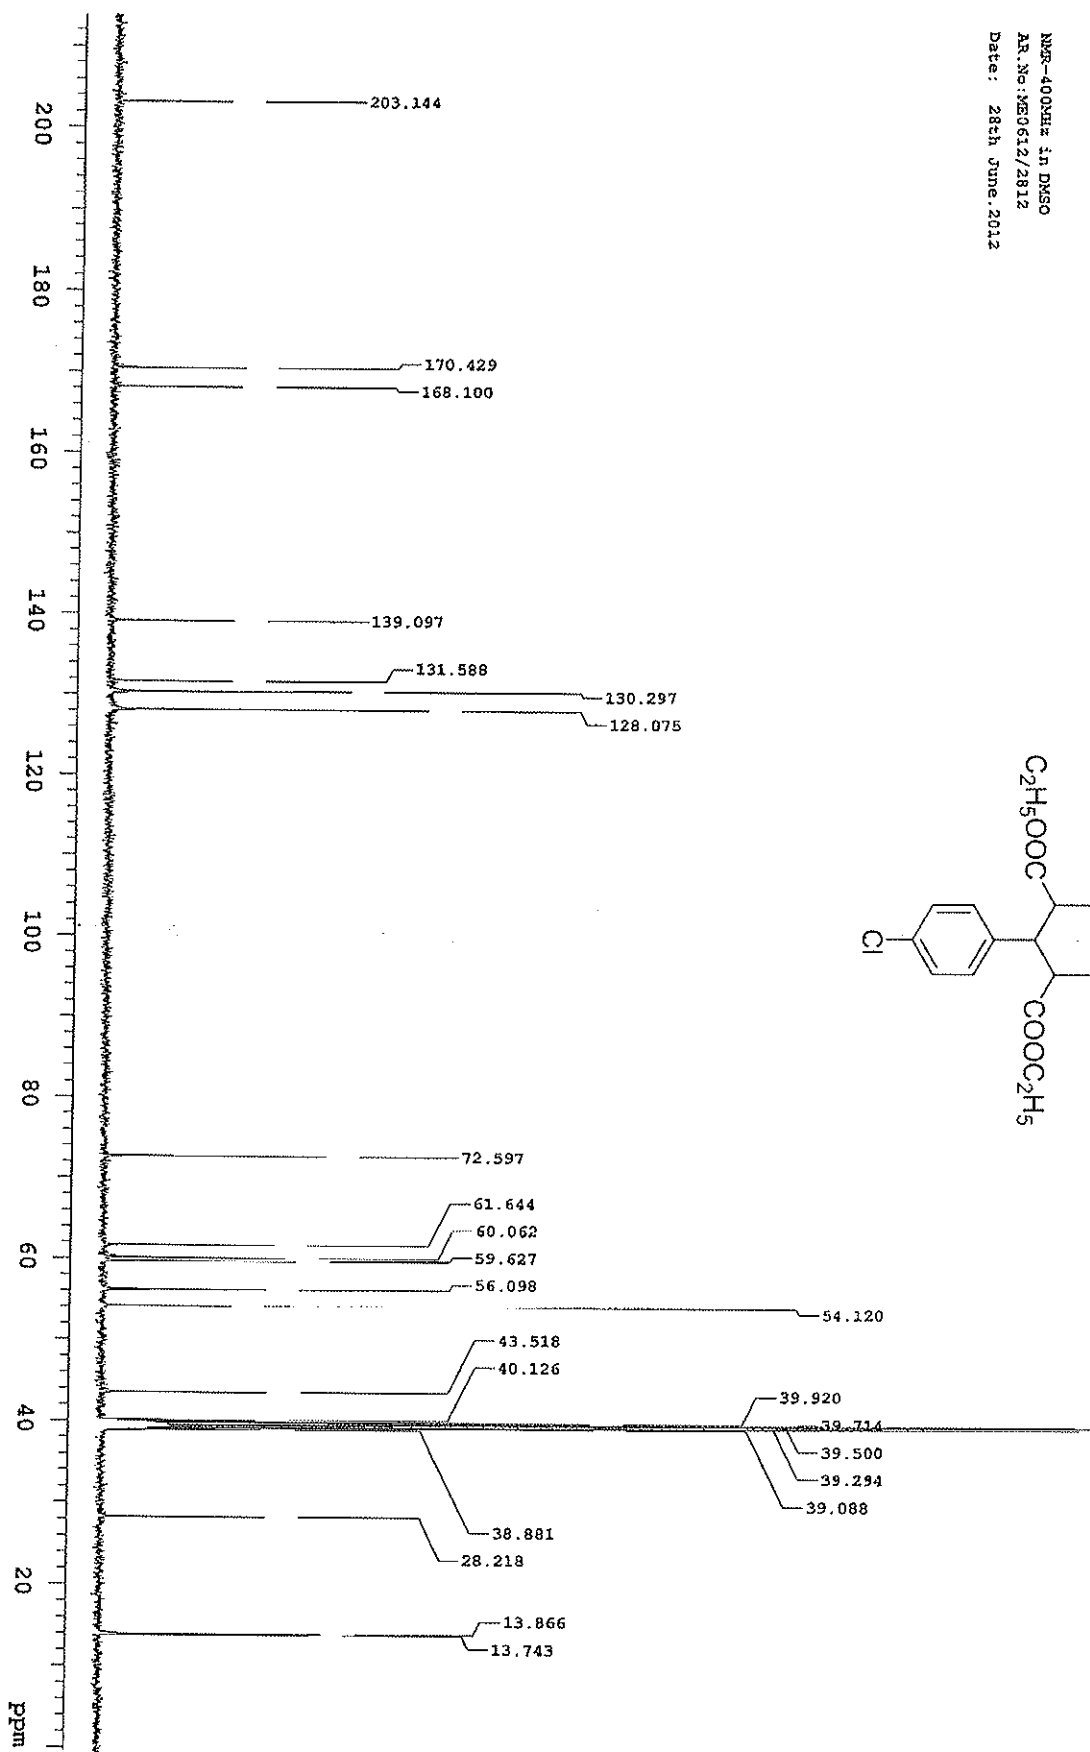

## Single Mass Analysis

Tolerance = 5.0 PPM / DBE: min = -1.0, max = 80.0

Element prediction: Off

Number of isotope peaks used for i-FIT = 3

Monoisotopic Mass, Even Electron Ions  
 35 formula(e) evaluated with 2 results within limits (up to 4 closest results for each mass)

Elements Used:

C: 0-25 H: 0-25 O: 0-6 Cl: 0-2

A786/CSAT1/063

U10712\_41 16 (0.293) Cm (16:20)

Dr.Reddy's Laboratories Ltd, ARD, TDC-1

1: TOF MS ES+  
8.56e+003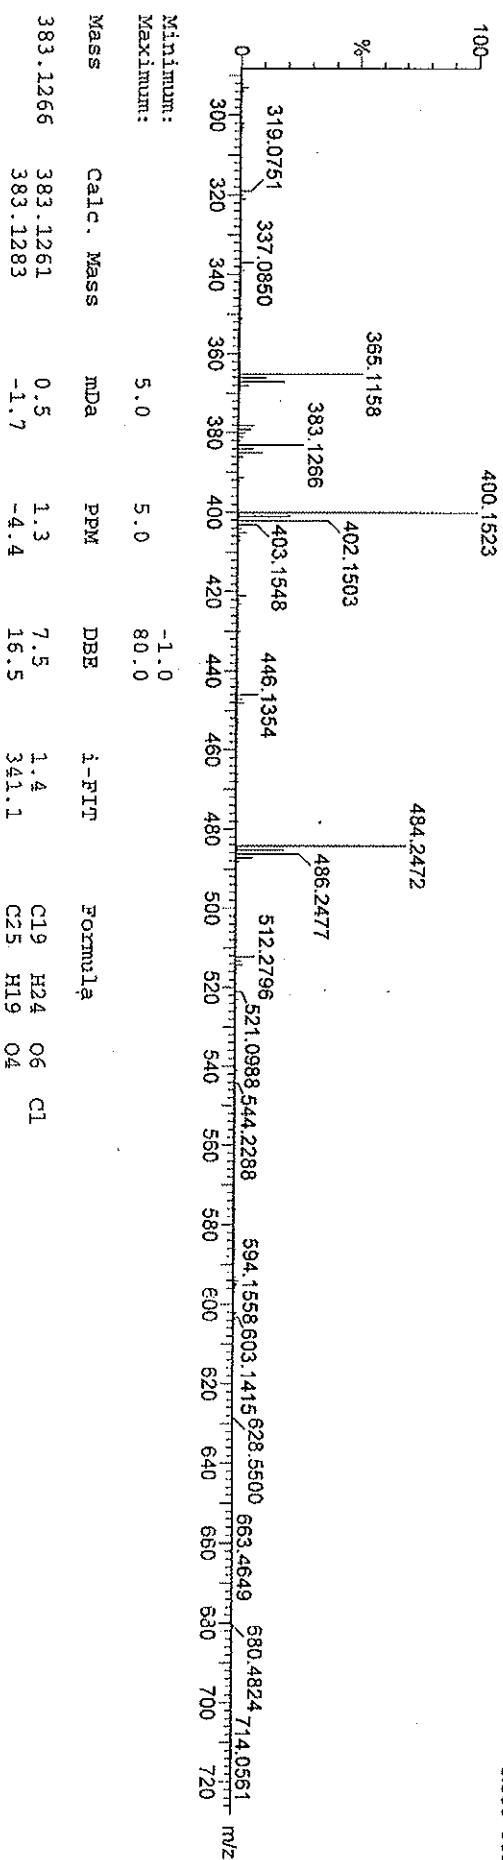

Minimum: 5.0  
 Maximum: 5.0  
 -1.0  
 80.0

| Mass     | Calc. Mass | mDa  | PPM  | DBE  | i-FIT | Formula       |
|----------|------------|------|------|------|-------|---------------|
| 383.1266 | 383.1261   | 0.5  | 1.3  | 7.5  | 1.4   | C19 H24 O6 Cl |
| 383.1283 | 383.1283   | -1.7 | -4.4 | 16.5 | 341.1 | C25 H19 O4    |

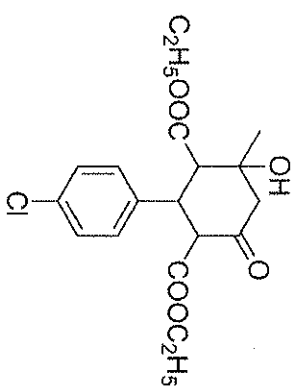

NMR-400MHz in DMSO  
R.N: ME0512/2451  
Date: 24th May 2012

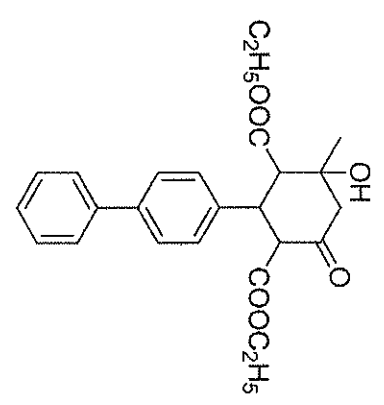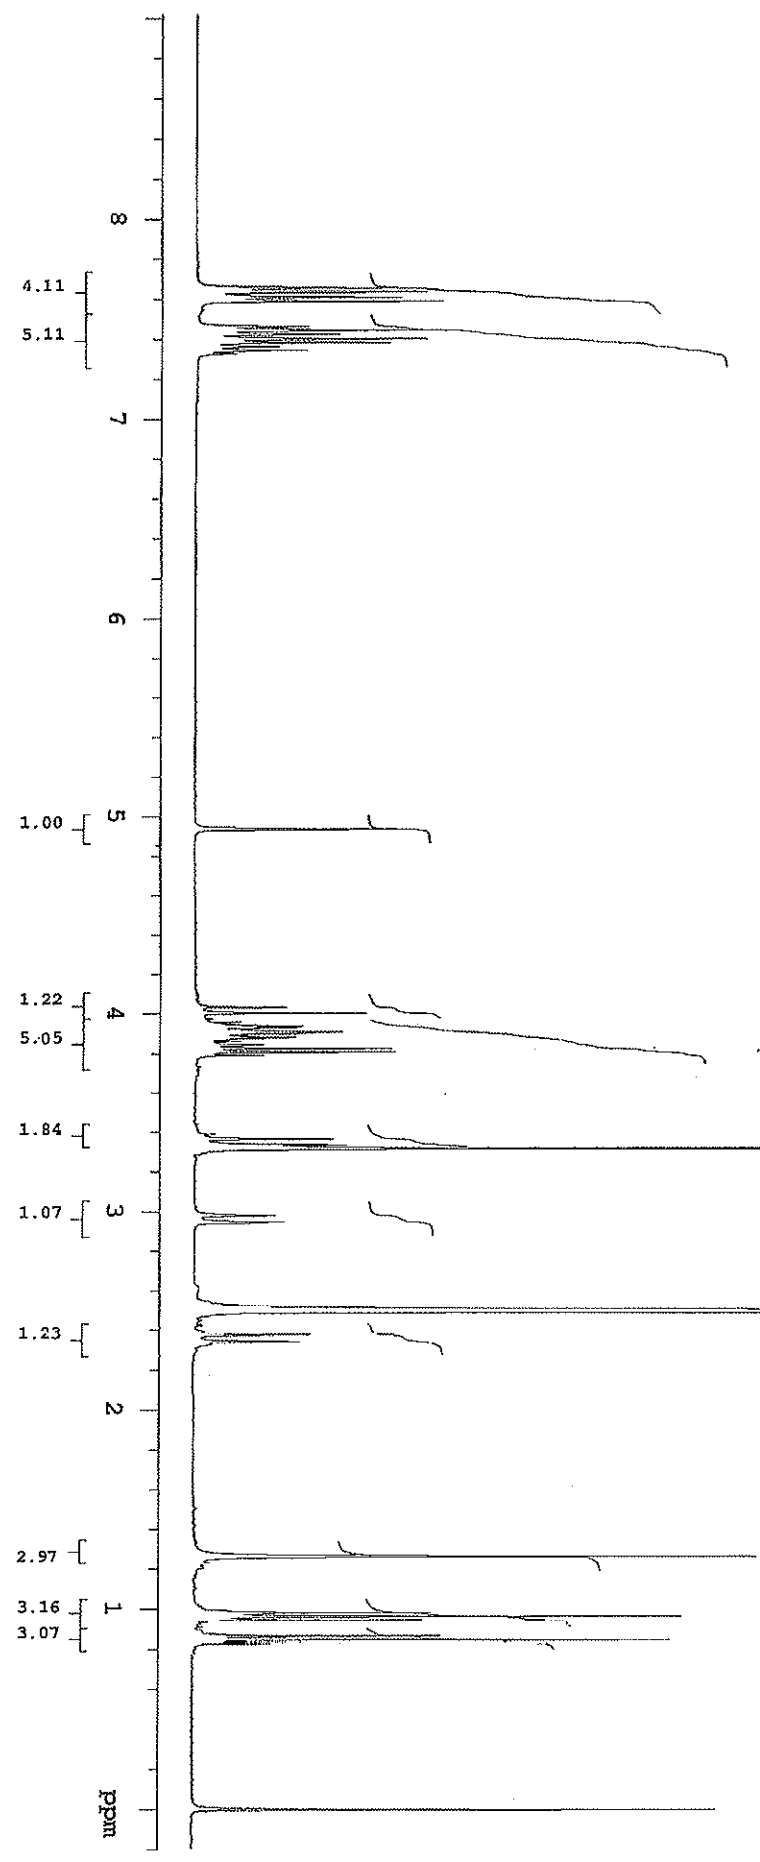

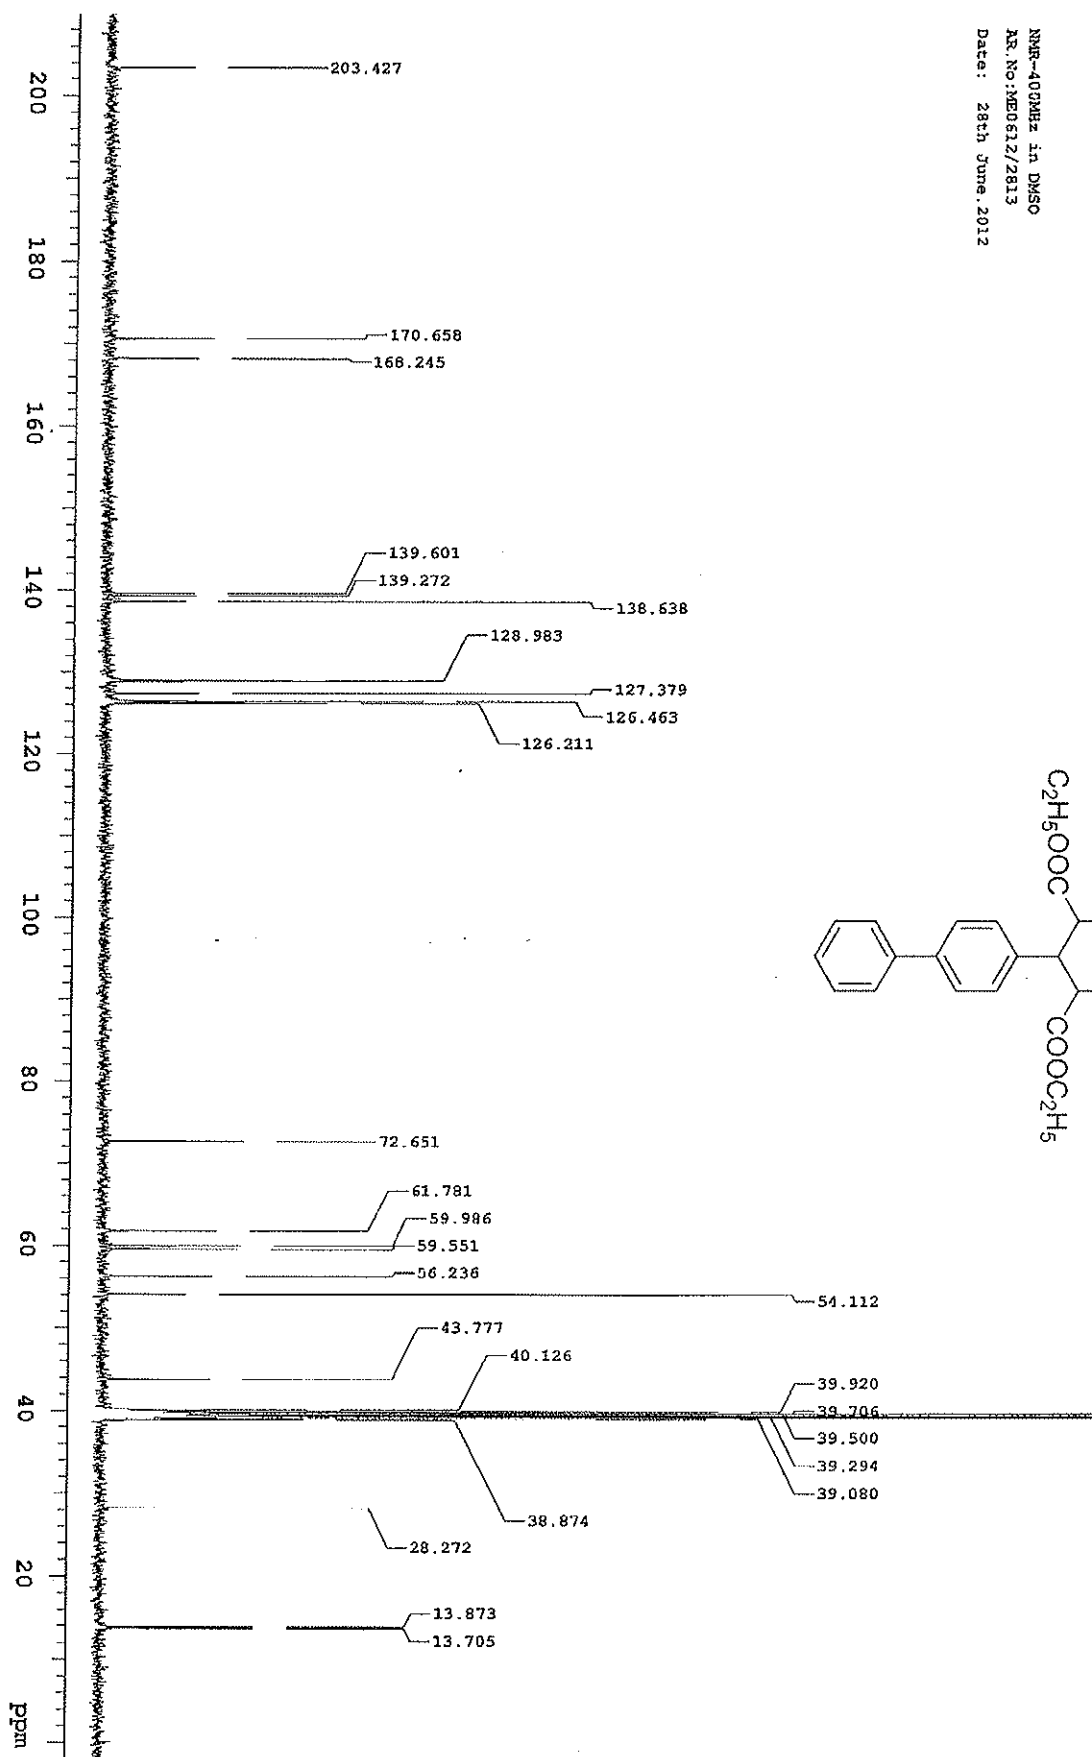

NMR-400MHz in DMSO  
Ac. No: ME0612/2813  
Date: 28th June.2012

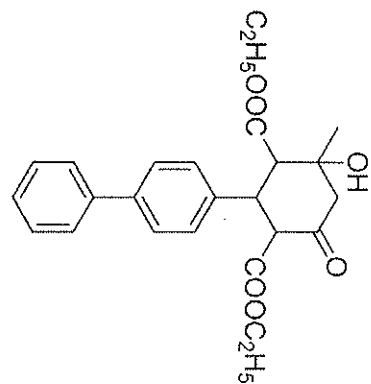



**Single Mass Analysis**

Tolerance = 5.0 PPM / DBE: min = -1.0, max = 80.0

Element prediction: Off

Number of isotope peaks used for i-FIT = 3

Monoisotopic Mass, Even Electron Ions

10 formula(e) evaluated with 1 results within limits (up to 4 closest results for each mass)

Elements Used:

C: 0-30 H: 0-30 O: 0-6

UT0712\_42 14 (0.265) Cm (13:24)

Dr.Reddy's Laboratories Ltd, ARD, TDC-1

1: TOF MS ES+  
7.03e+004

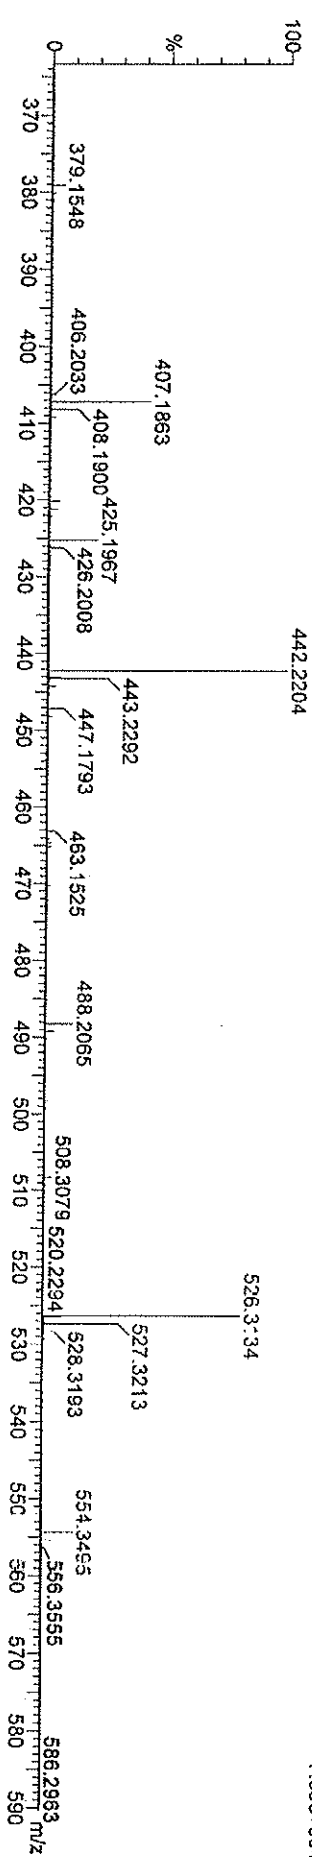

Minimum: 5.0  
Maximum: 5.0

| Mass     | Calc. Mass | mDa | PPM | DBE  | i-FIT | Formula    |
|----------|------------|-----|-----|------|-------|------------|
| 425.1967 | 425.1964   | 0.3 | 0.7 | 11.5 | 2.1   | C25 H29 O6 |

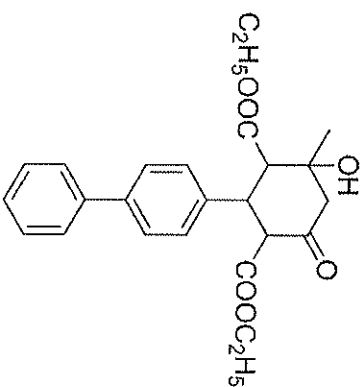

NMR-400MHz in CDCl<sub>3</sub>  
R.N:ME0512/1437  
Date:15th May, 2012

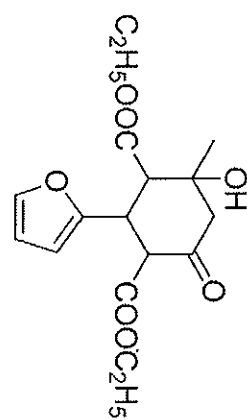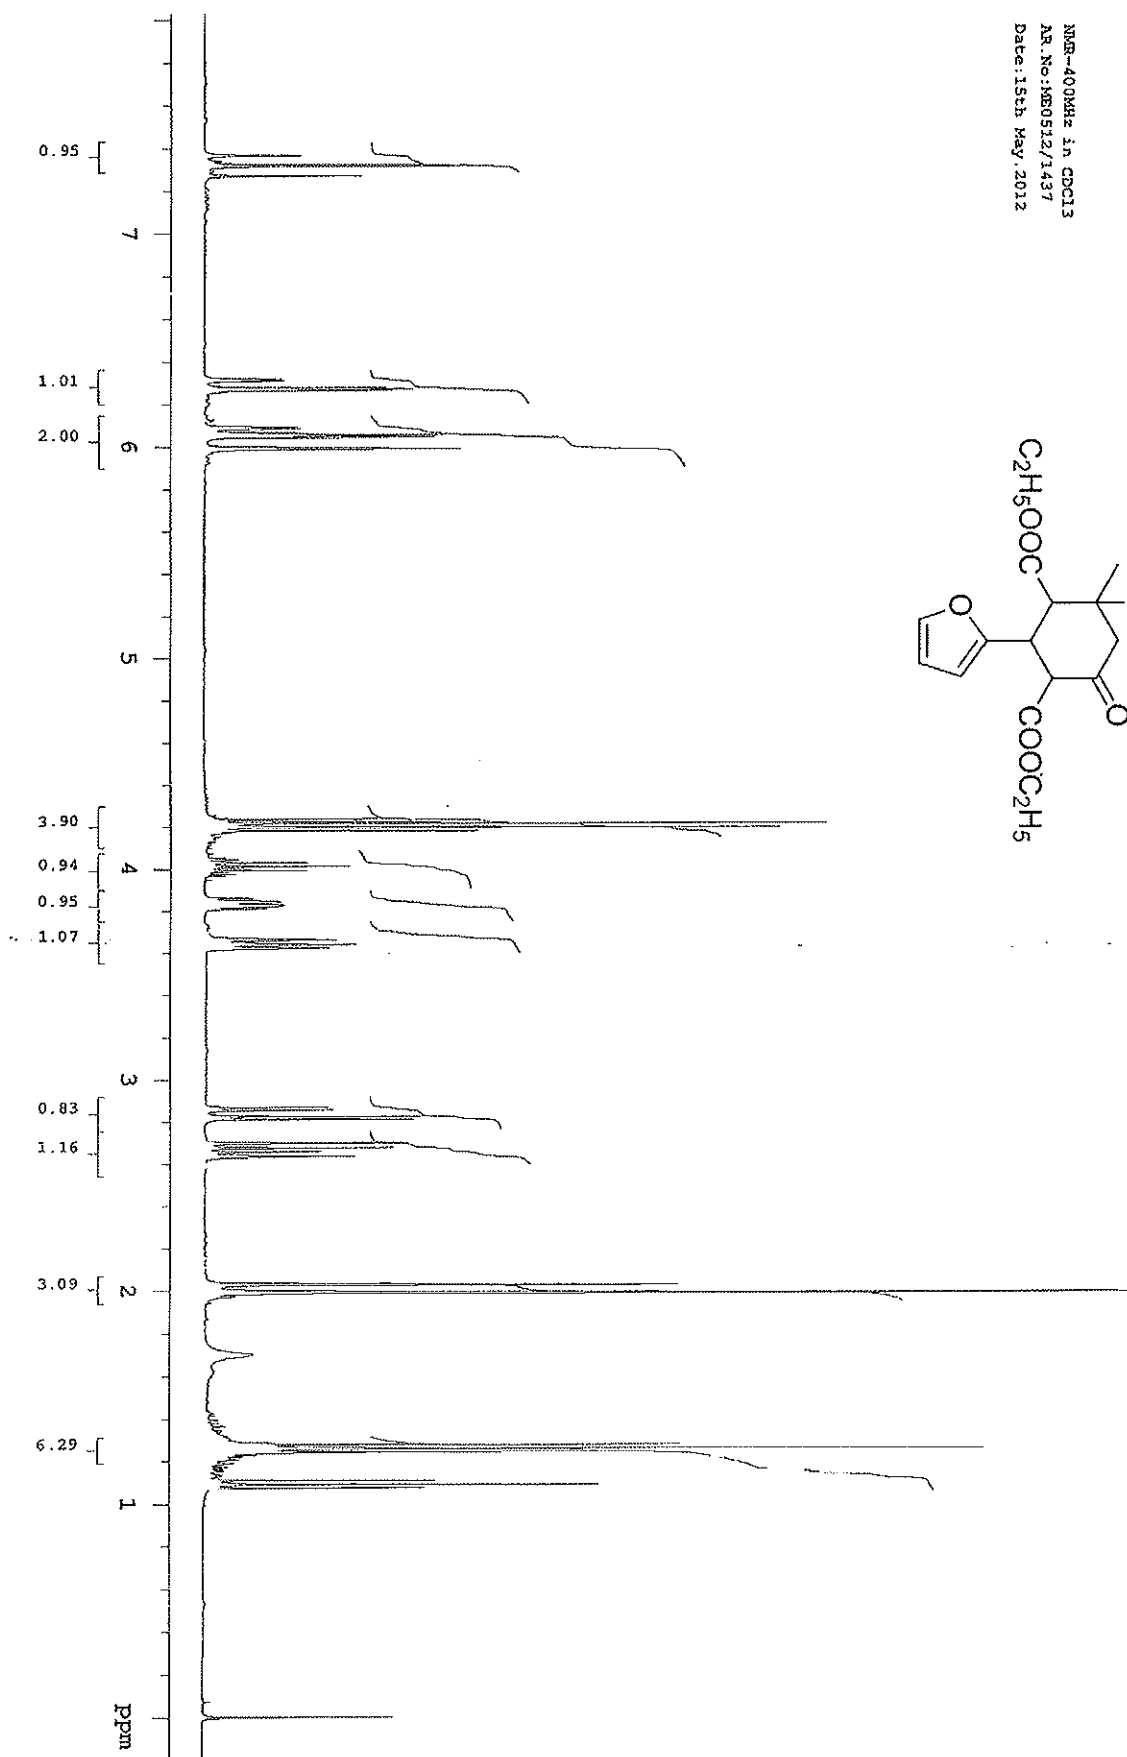

NMR-400MHZ in CDCl3  
AR.No:ME0912/569  
Date: 7th Sept 2012

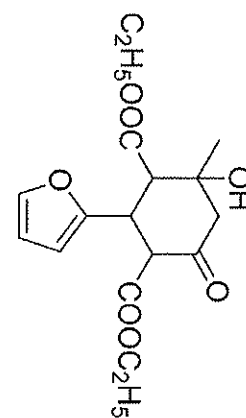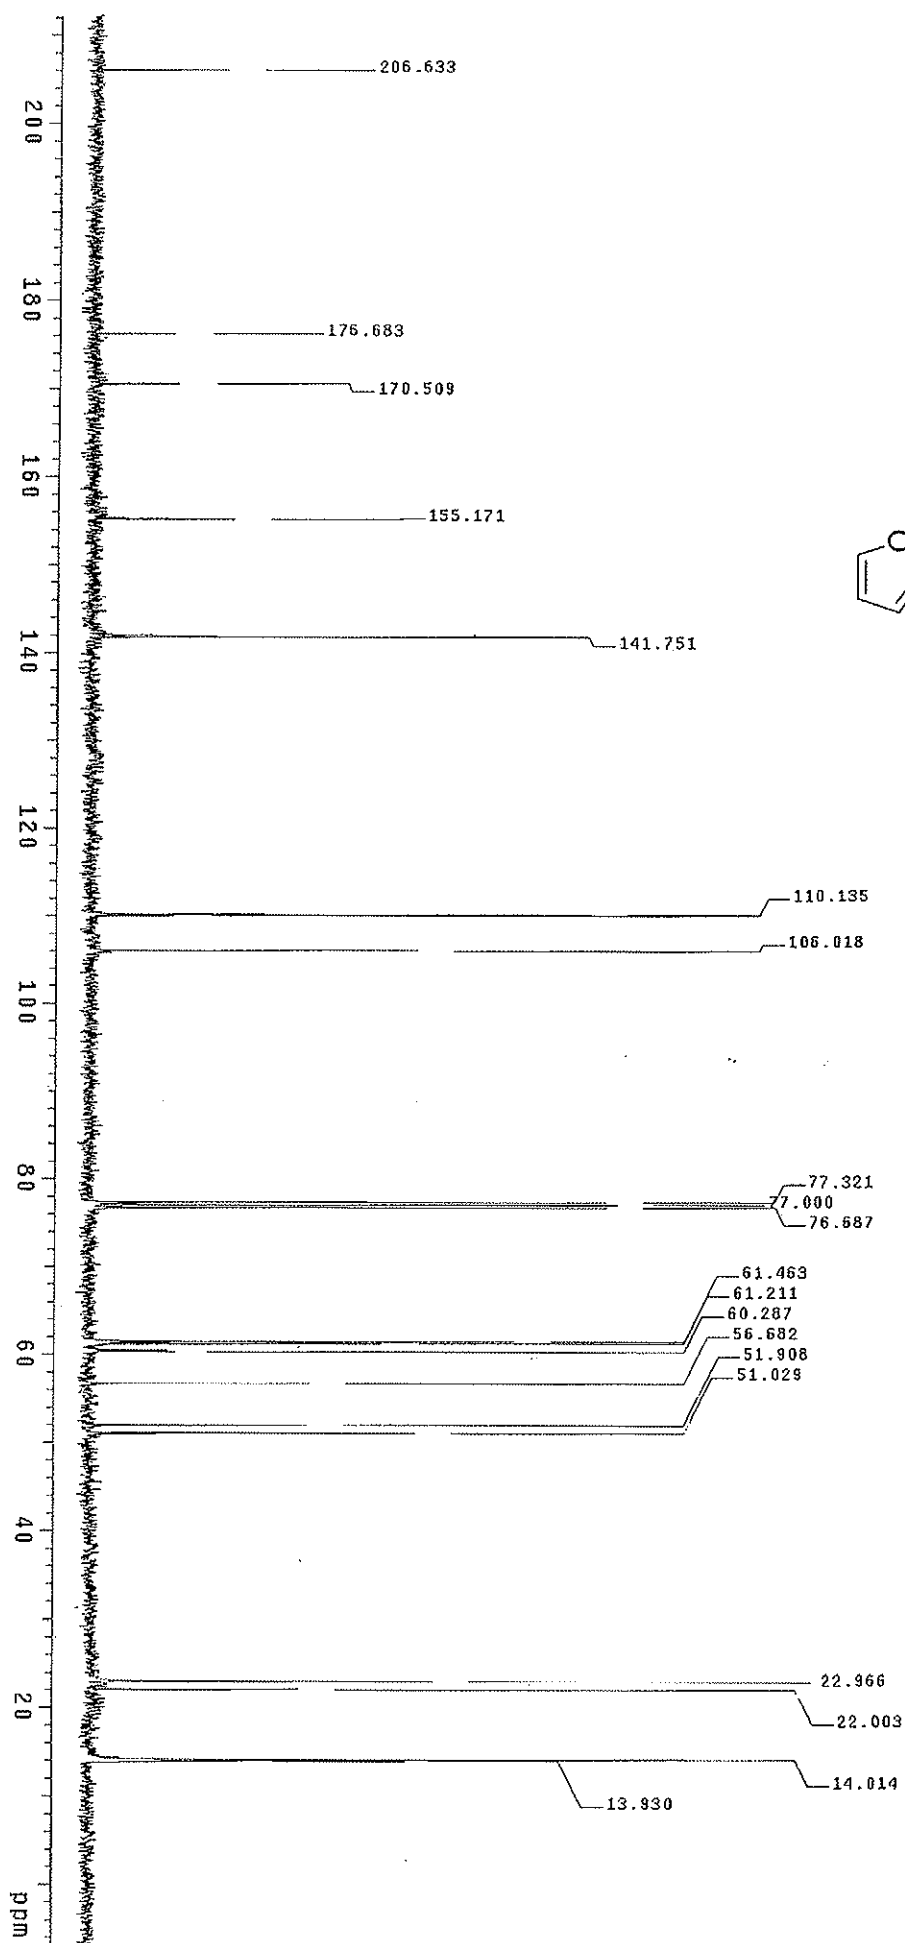

# Elemental Composition Report

## Single Mass Analysis

Tolerance = 5.0 PPM / DBE: min = -1.0, max = 40.0

Element prediction: Off

Number of isotope peaks used for i-FIT = 2

Monoisotopic Mass, Even Electron Ions

22 formula(e) evaluated with 1 results within limits (up to 5 best isotopic matches for each mass)

Elements Used:

C: 0-30 H: 0-30 O: 0-7

Dr.Reddy's Laboratories Ltd, ARD, TDC-1

UT0512\_053 6 (0.225) Cm (6:8)

1: TOF MS ES+  
2.01e+004

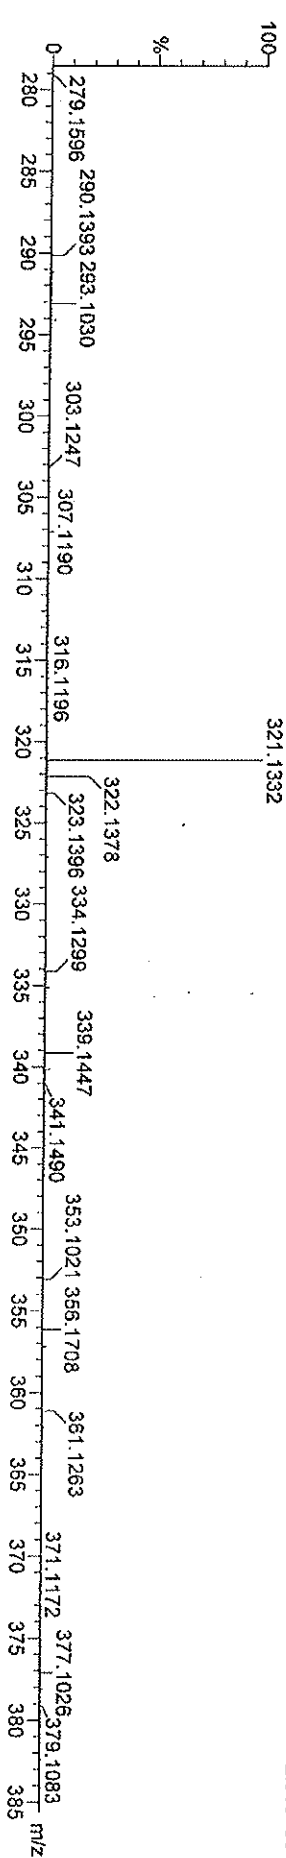

Minimum: 5.0  
Maximum: 5.0

-1.0  
40.0

| Mass     | Calc. Mass | mDa | PPM | DBE | i-FIT | Formula    |
|----------|------------|-----|-----|-----|-------|------------|
| 339.1447 | 339.1444   | 0.3 | 0.9 | 6.5 | 1.1   | C17 H23 O7 |

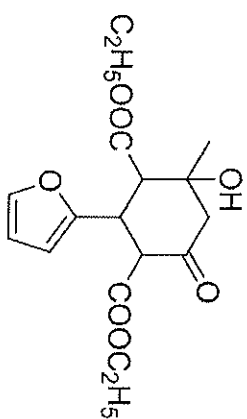

NMR-400MHz in CDCl<sub>3</sub>  
AR\_M01ME0512/1150  
Date:11th May, 2012

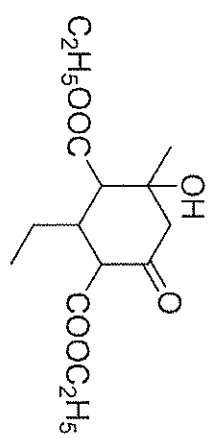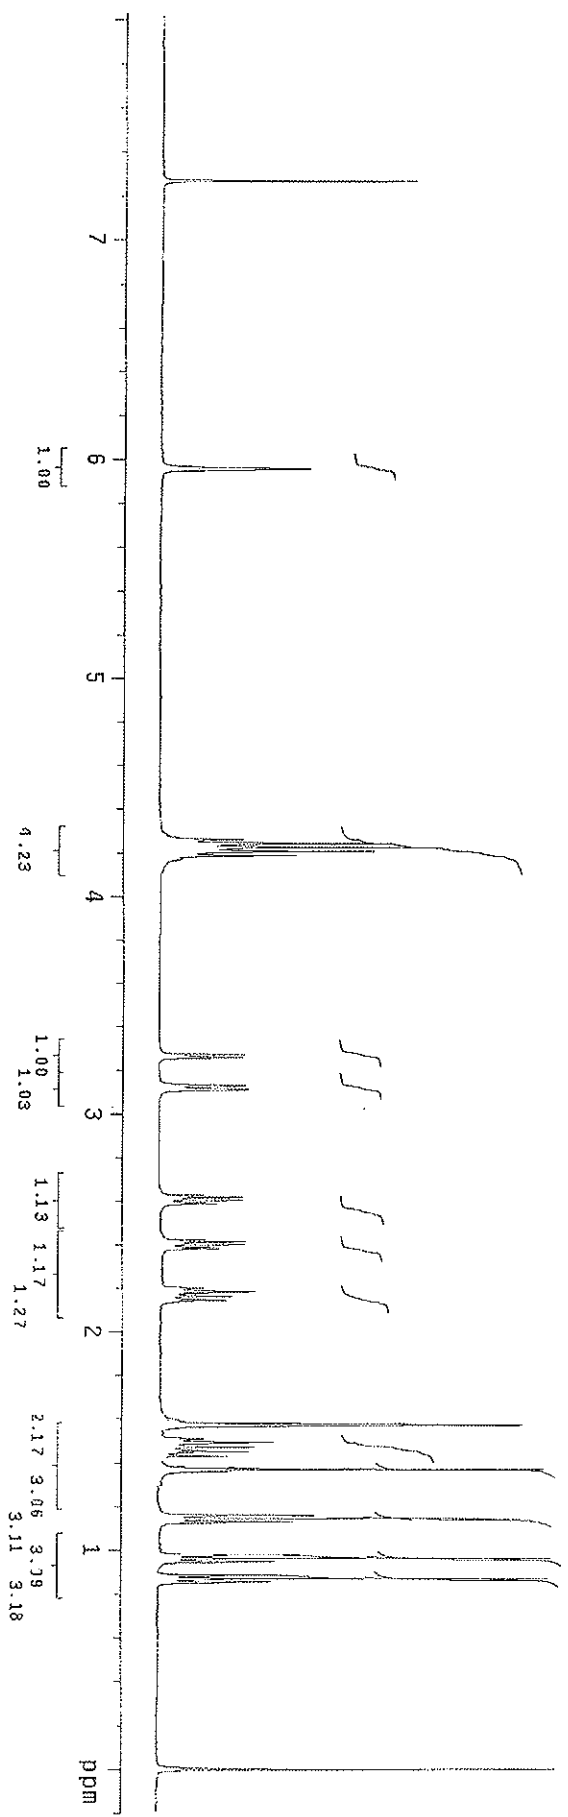

NMR-400MHz in CDCl<sub>3</sub>  
AR.No:MR0612/2952  
Date: 29th June, 2012

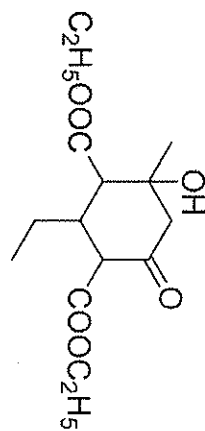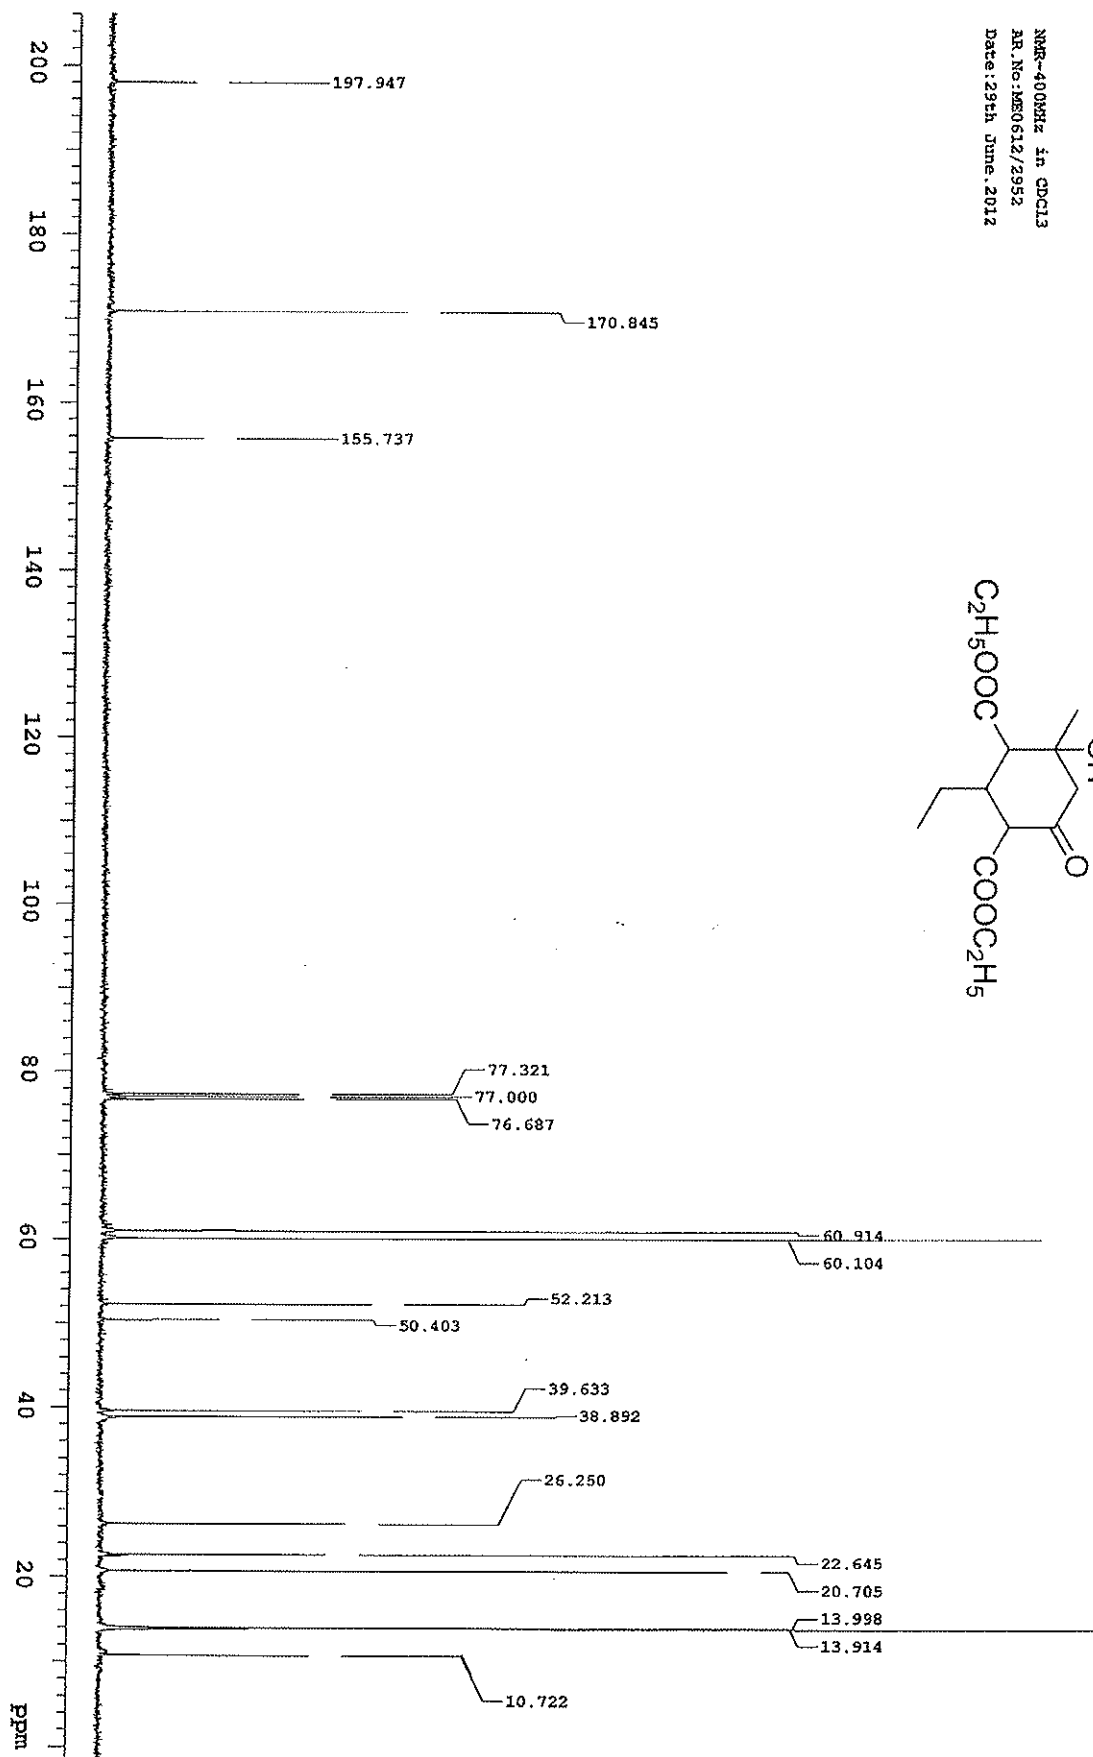

### Elemental Composition Report

#### Single Mass Analysis

Tolerance = 5.0 PPM / DBE: min = -1.0, max = 80.0  
 Element prediction: Off  
 Number of Isotope peaks used for i-FIT = 3

Monoisotopic Mass, Even Electron Ions  
 39 formula(e) evaluated with 1 results within limits (up to 5 closest results for each mass)  
 Elements Used:  
 C: 0-50 H: 0-60 O: 0-10

UT0812\_042 18 (0.339) Cm (18:22)

Dr.Reddy's Laboratories Ltd, ARD, TDC-1

1: TOF MS ES+  
 3.17e+003

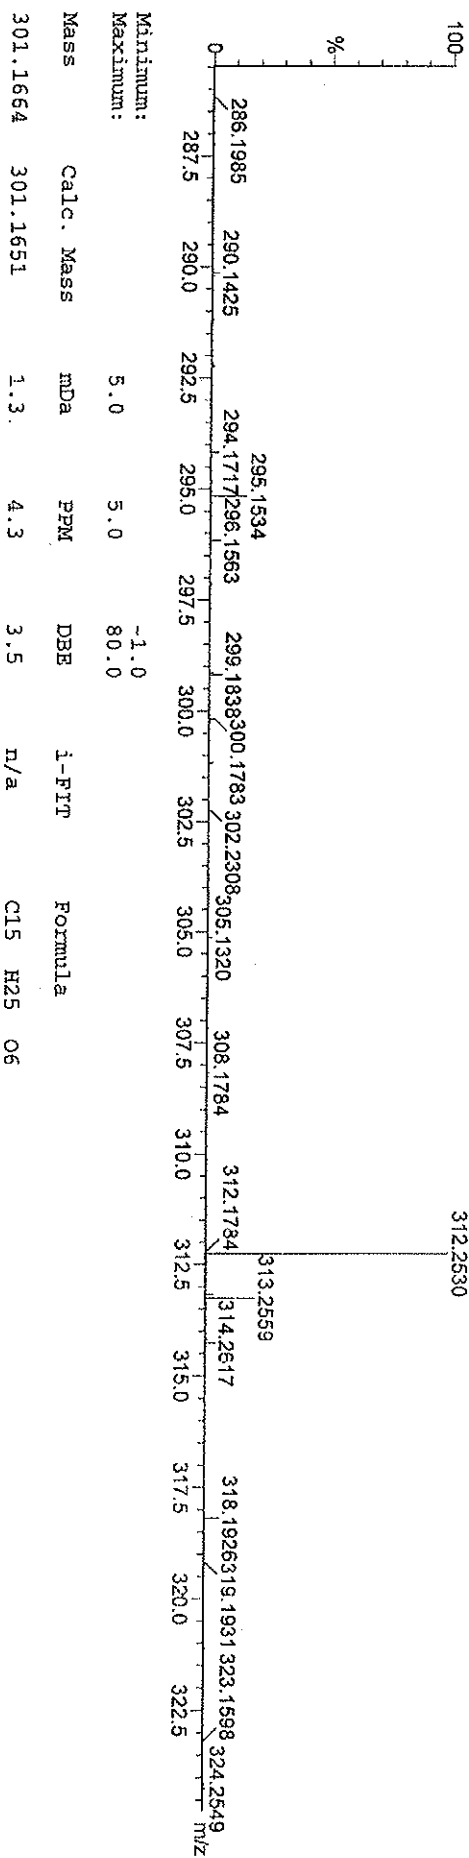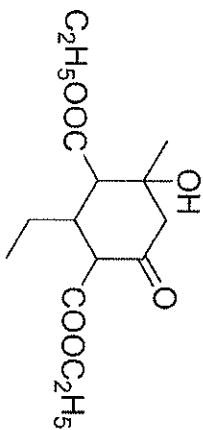

NR-400MHz 4h CDCl3  
A.R.No:ME9512/1057  
Date:11th May,2012

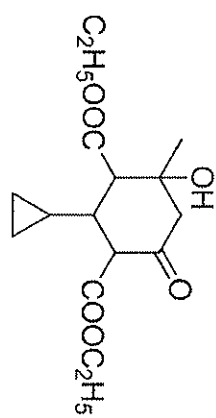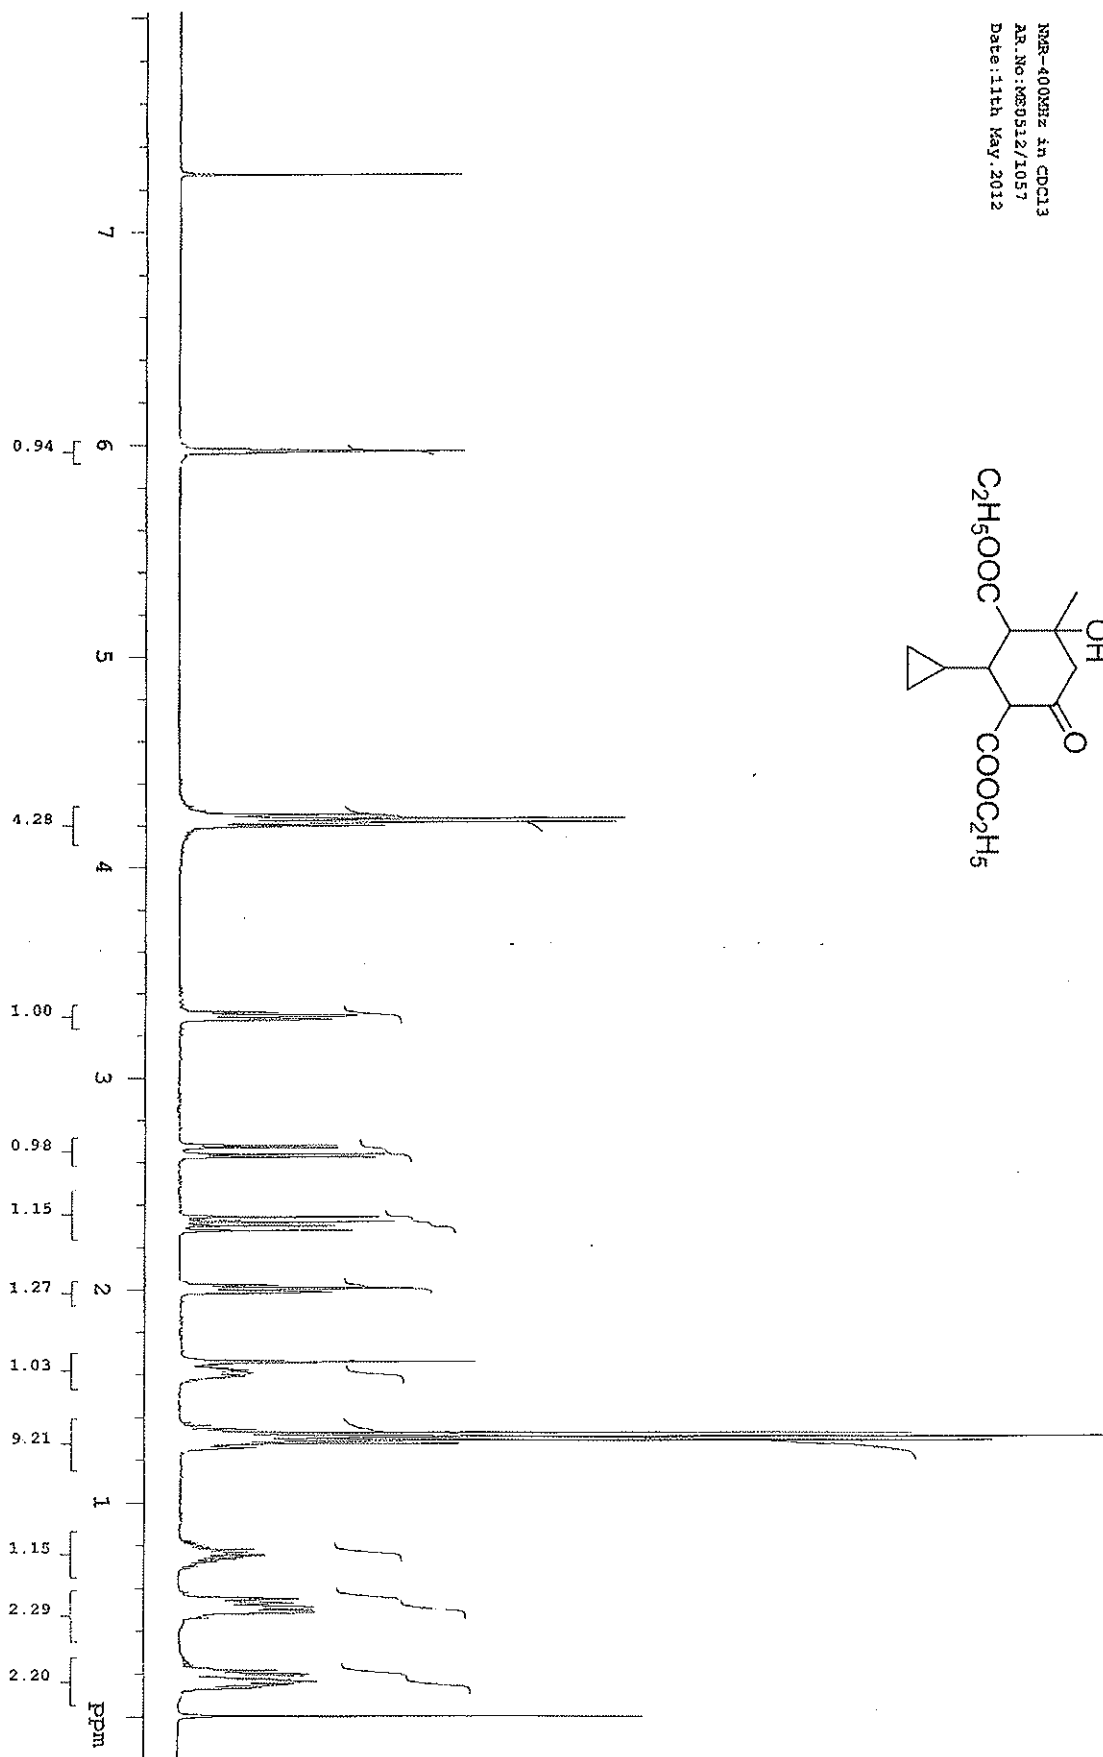



NMR-400MHz in DMSO  
Ac.No:ME0712/1347  
Date:13th July,2012

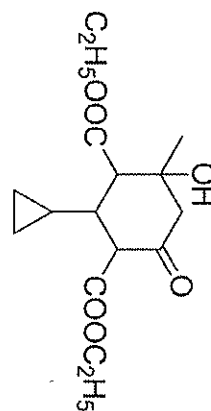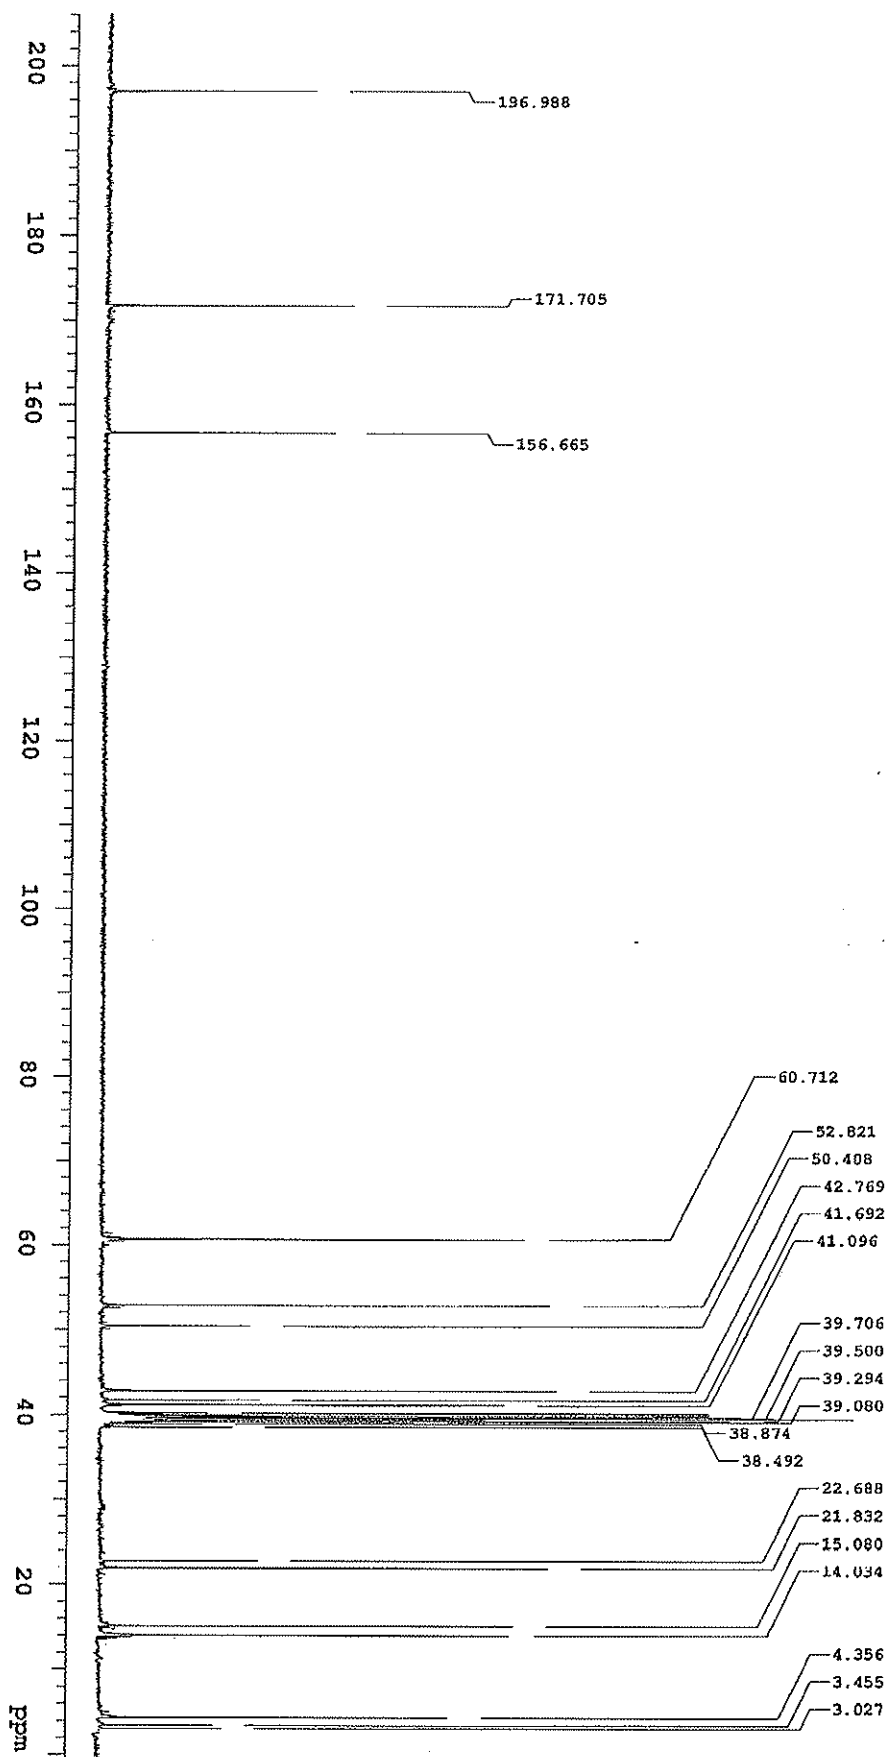

### Elemental Composition Report

#### Single Mass Analysis

Tolerance = 5.0 PPM / DBE: min = -1.0, max = 40.0  
 Element prediction: Off  
 Number of isotope peaks used for I-FIT = 2

Monoisotopic Mass: Even Electron Ions

31 formula(e) evaluated with 1 results within limits (up to 5 best isotopic matches for each mass)

Elements Used:

C: 0-25 H: 0-35 O: 0-10

Dr.Reddy's Laboratories Ltd, ARD, TDC-1

UT0512\_022.25 (0.902) Cm (25:34-6:10x0.010)

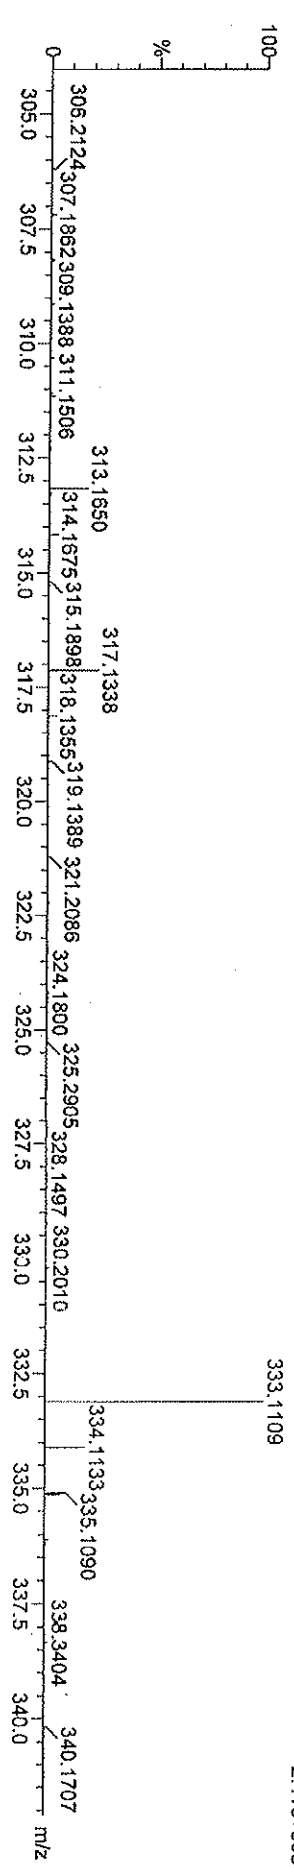

| Mass     | Calc. Mass | MDa  | PPM  | DBE | I-FIT | Formula    |
|----------|------------|------|------|-----|-------|------------|
| 313.1650 | 313.1651   | -0.1 | -0.3 | 4.5 | 1.0   | C16 H25 O6 |

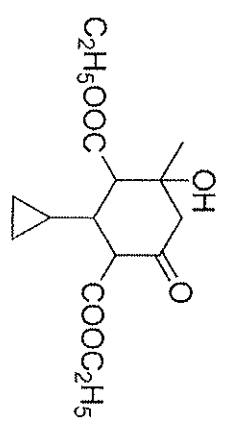

NMR-400MHz in CDCl3  
RR.No:ME0812/465  
Date: 6th Sept 2012

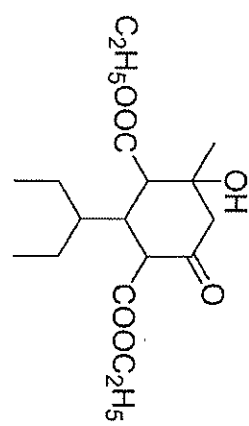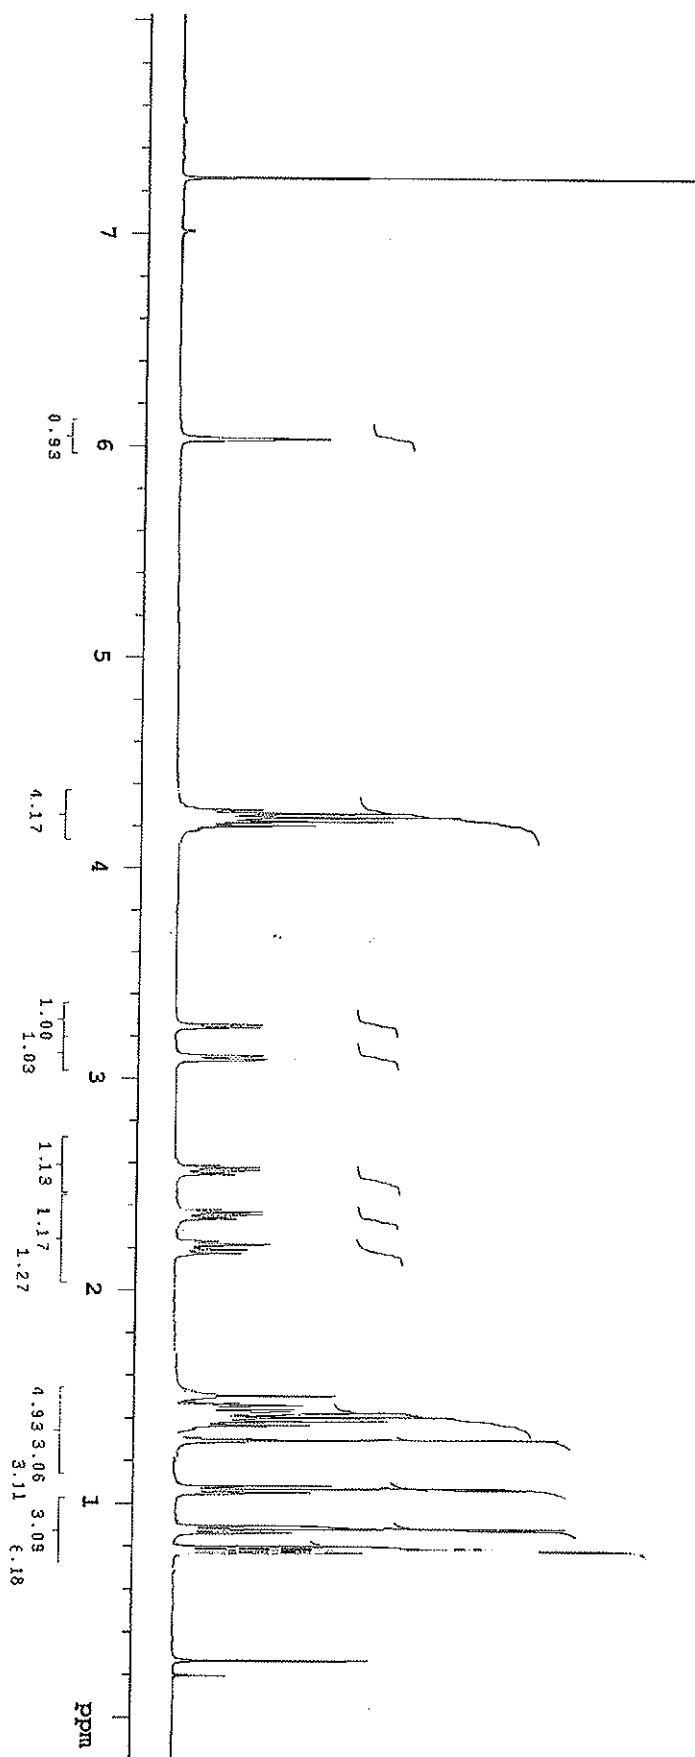

NMR-400MHz in CDCl<sub>3</sub>  
RR.No:MS0512/259  
Date: 9th June 2012

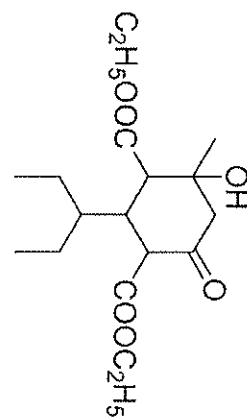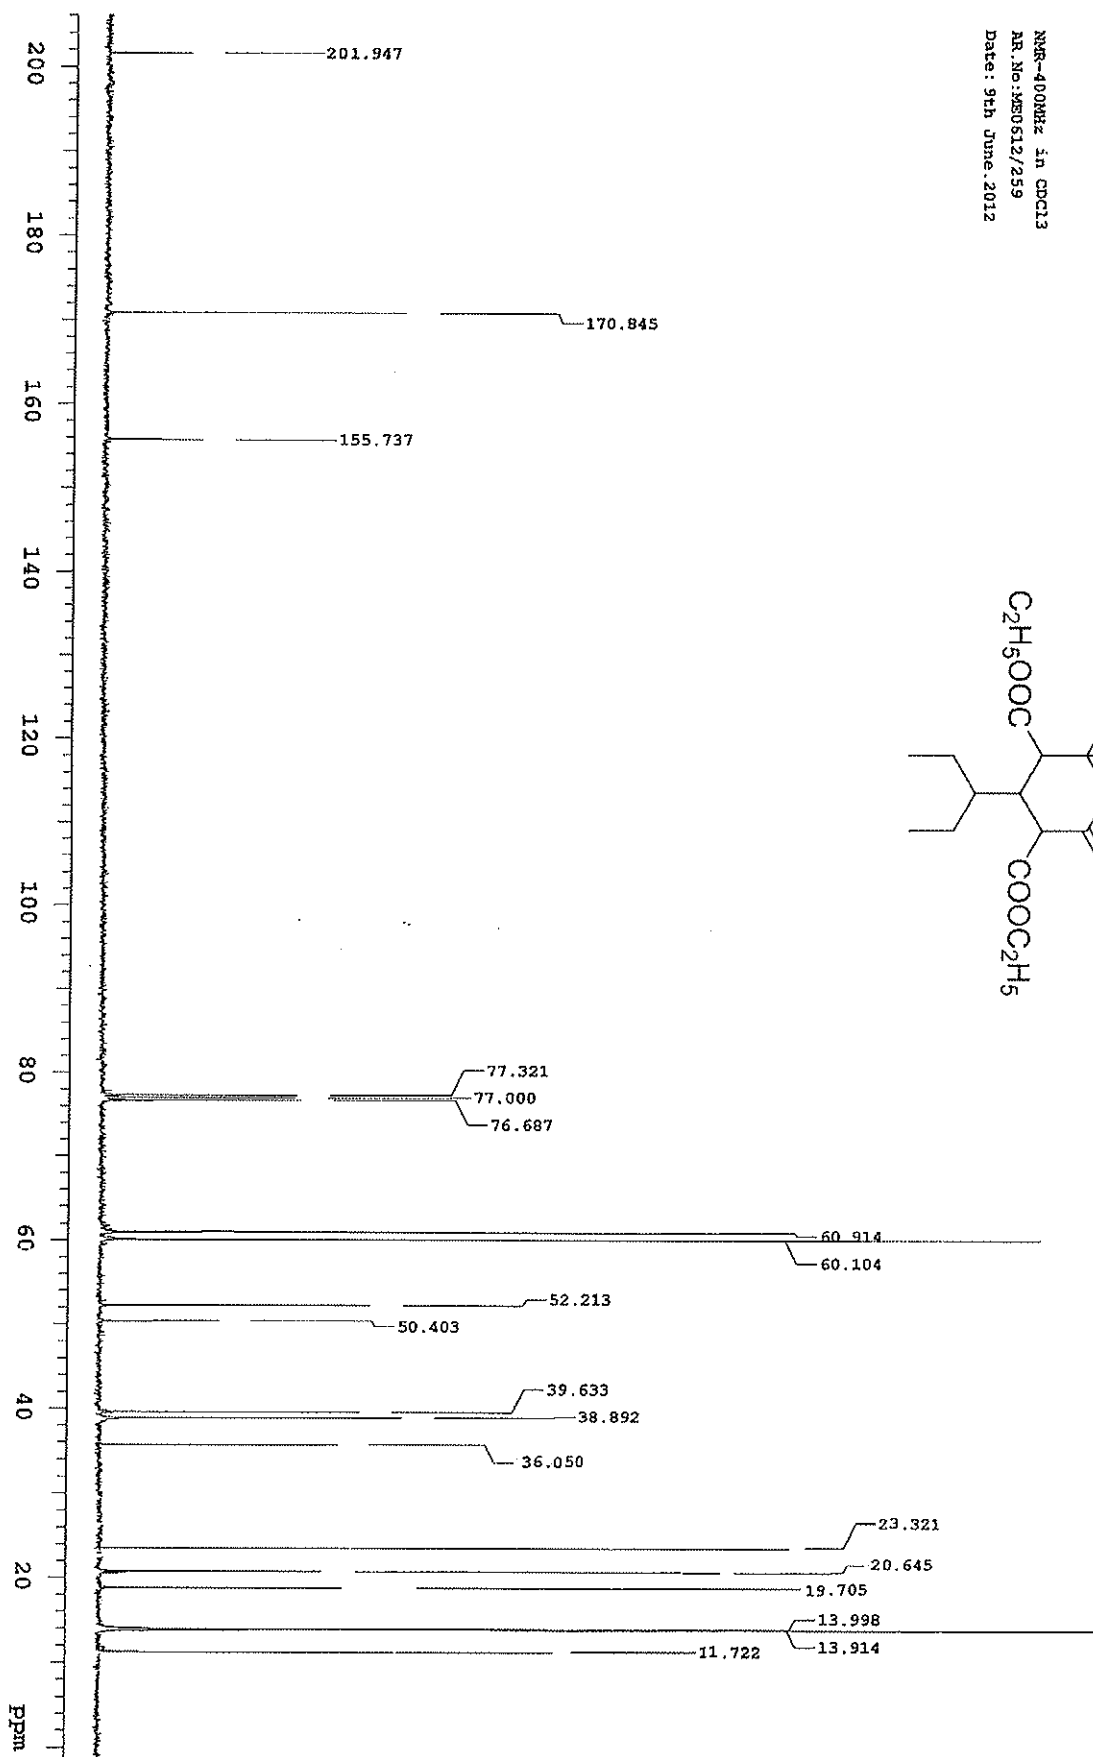

NMR-400MHz in DMSO  
AR.No:ME0512/111  
Date: 02nd May, 2012

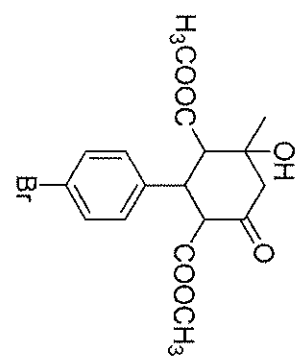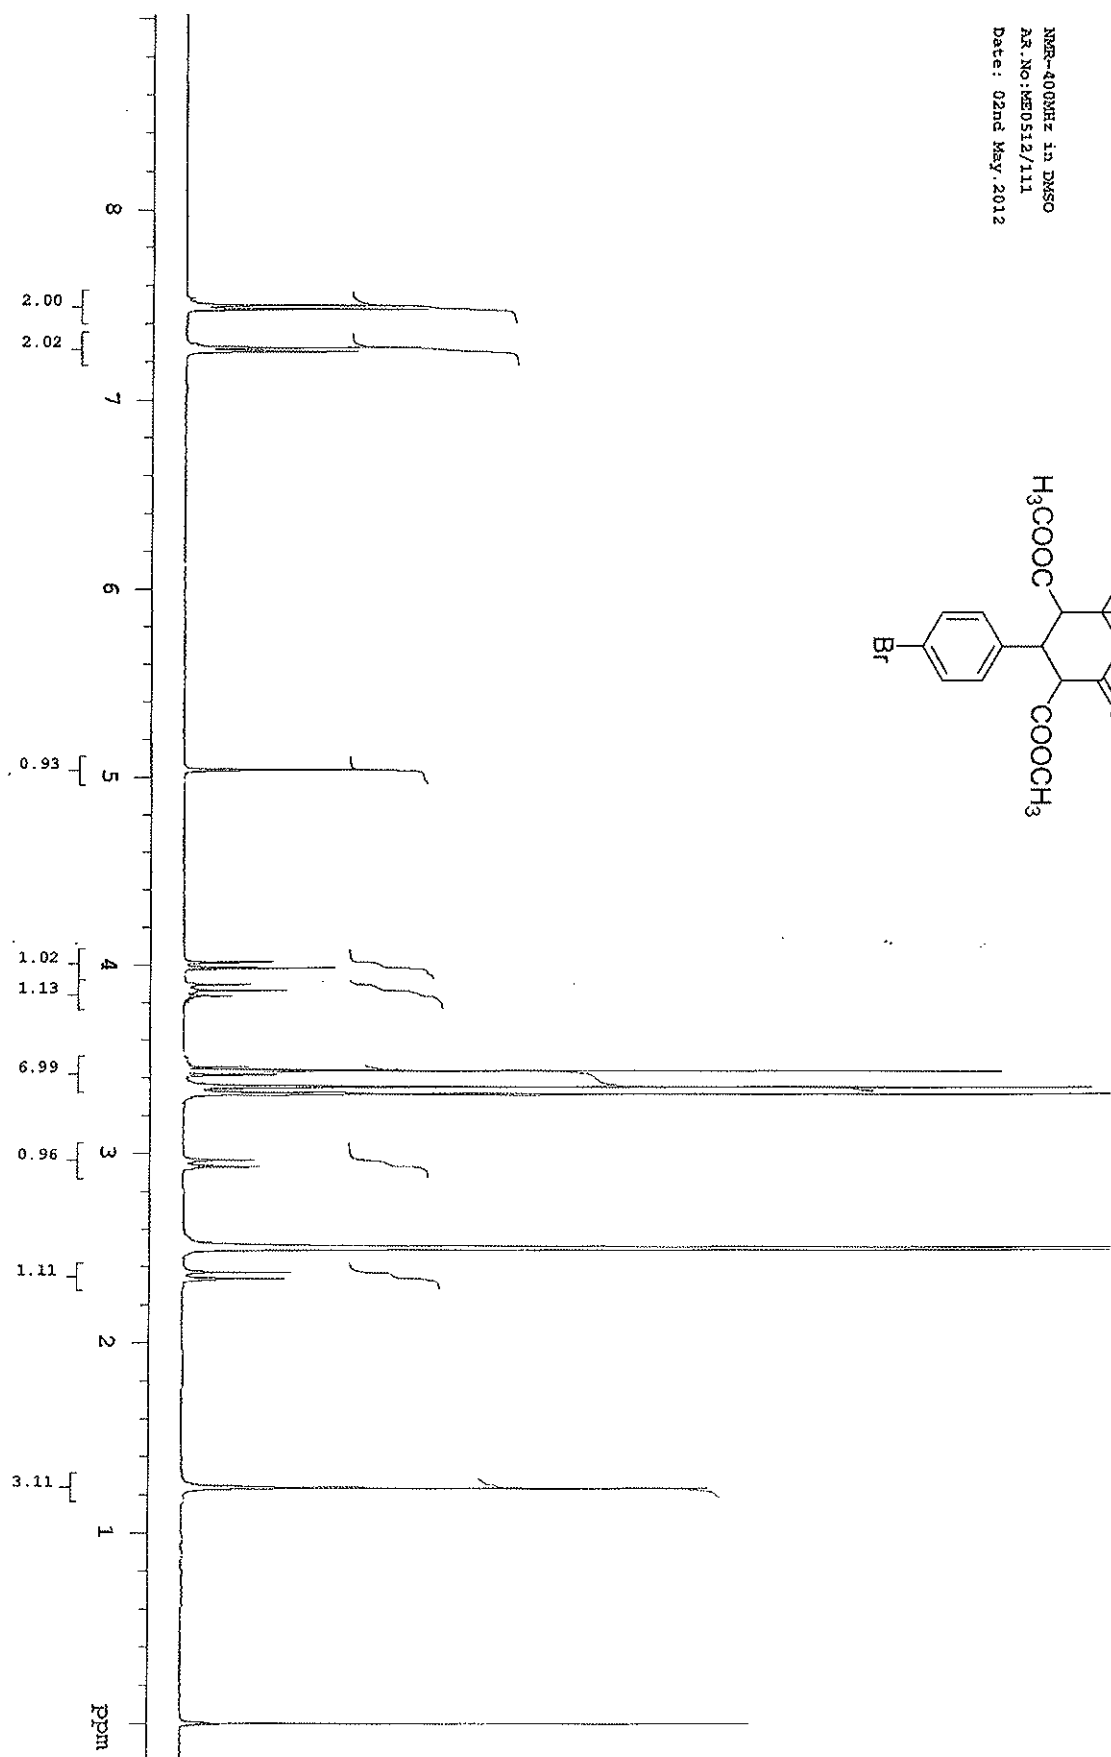

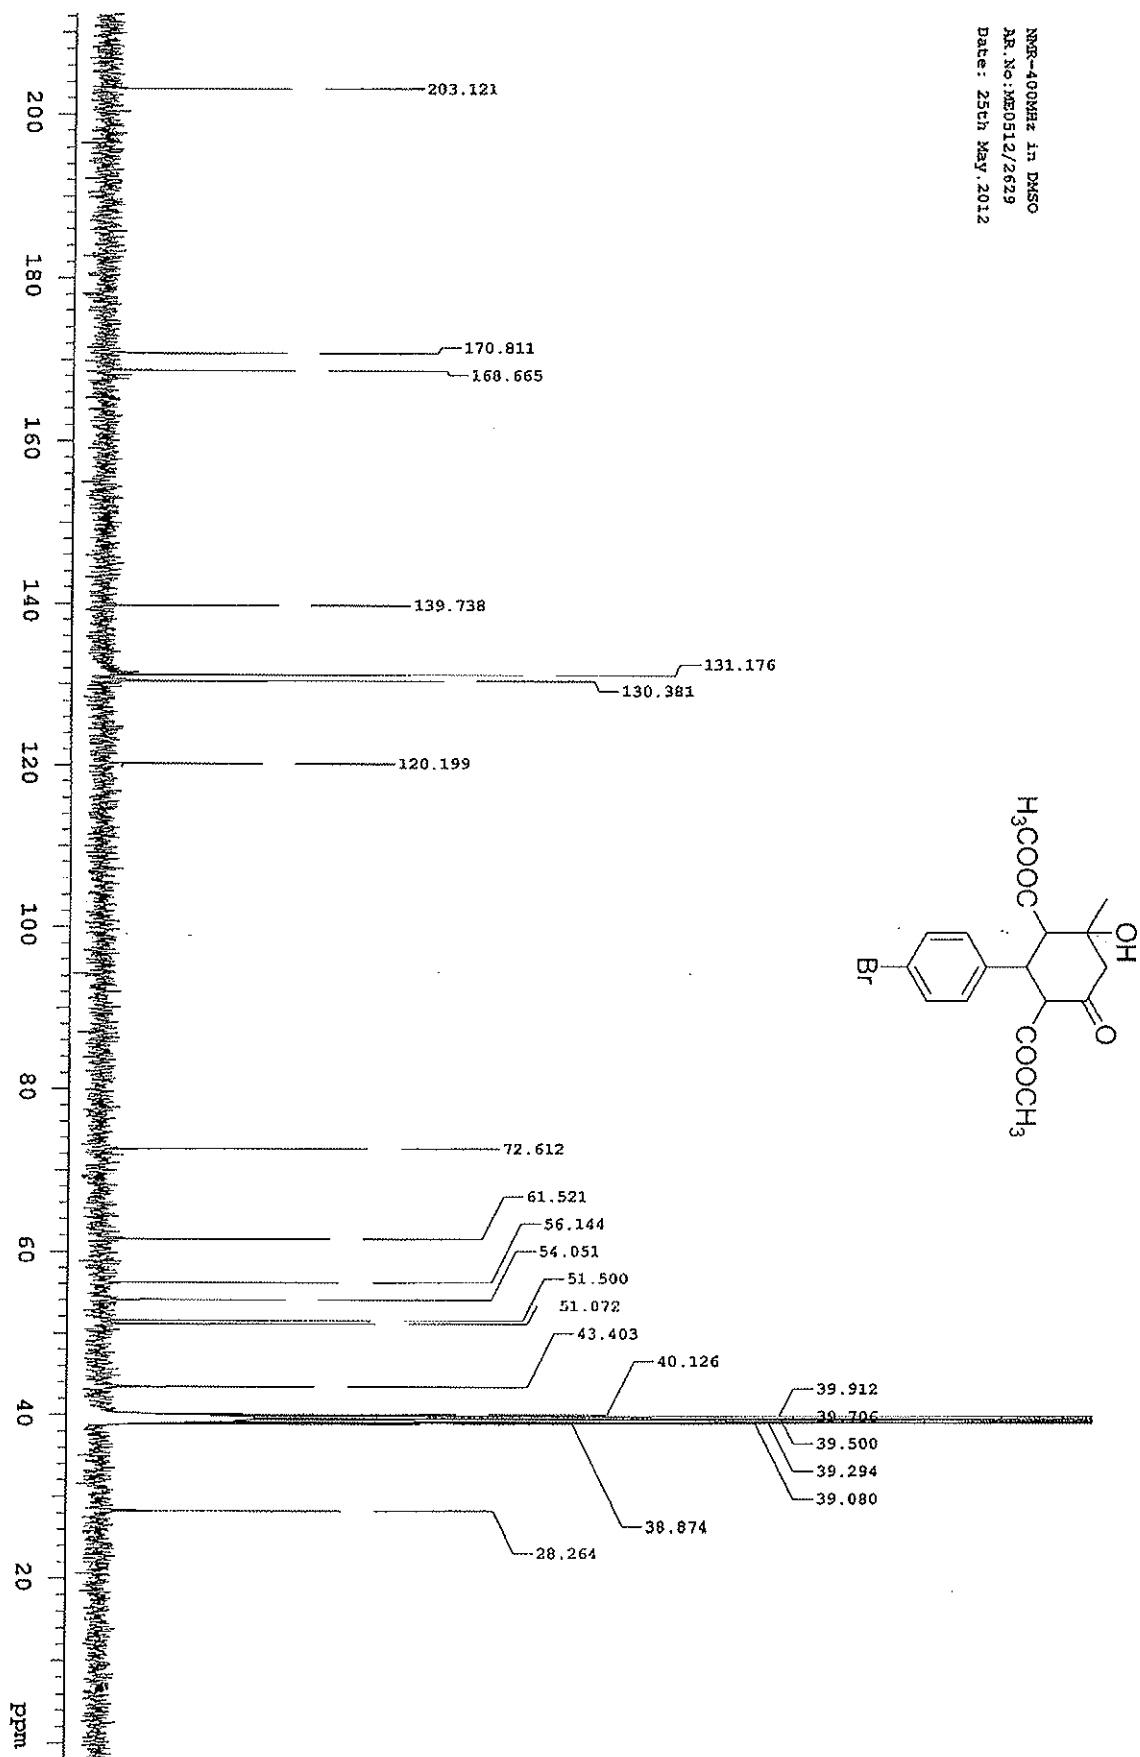

# Elemental Composition Report

## Single Mass Analysis

Tolerance = 5.0 PPM / DBE: min = -1.0, max = 80.0

Element prediction: Off

Number of isotope peaks used for i-FIT = 3

Monoisotopic Mass, Even Electron Ions

38 formula(e) evaluated with 1 results within limits (up to 4 closest results for each mass)

Elements Used:

C: 0-25 H: 0-25 O: 0-6 Br: 0-2

UT0712\_40 14 (0.265) Cm (12.23)

Dr.Reddy's Laboratories Ltd, ARD, TDC-1

1: TOF MS ES+  
1.73e+004

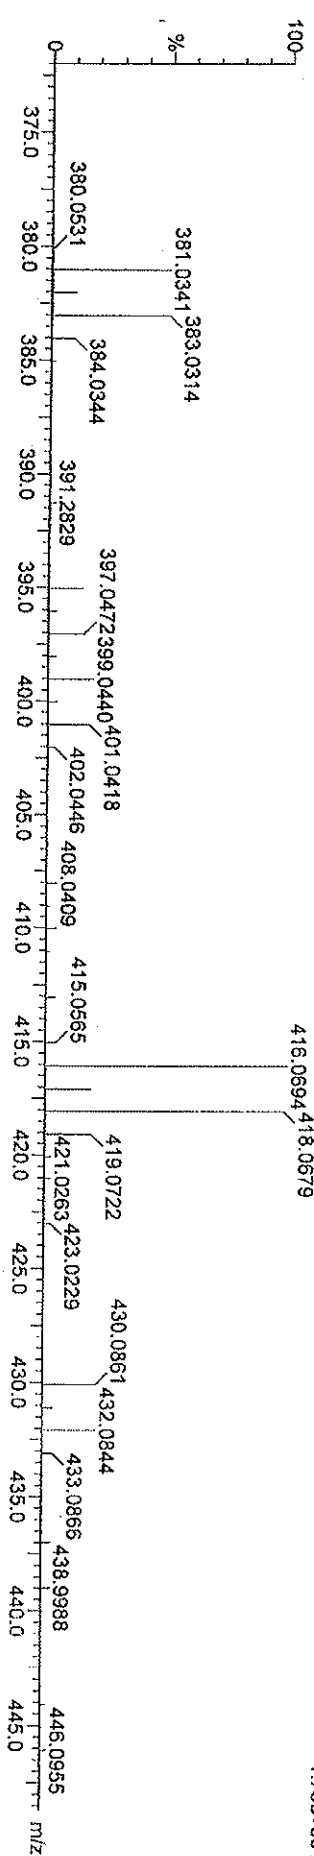

Minimum: 5.0  
Maximum: 5.0  
-1.0  
80.0

| Mass     | Calc. Mass | mda  | ppm  | DBE | i-FIT | Formula       |
|----------|------------|------|------|-----|-------|---------------|
| 399.0440 | 399.0443   | -0.3 | -0.8 | 7.5 | 5.8   | C17 H20 O6 Br |

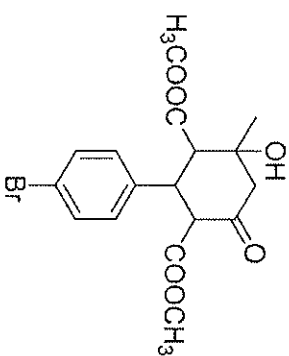

NMR-400MHz in DMSO  
AR.No:ME0512/112  
Date: 02nd May .2012

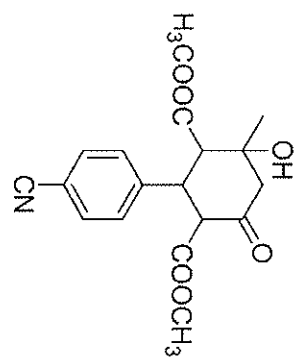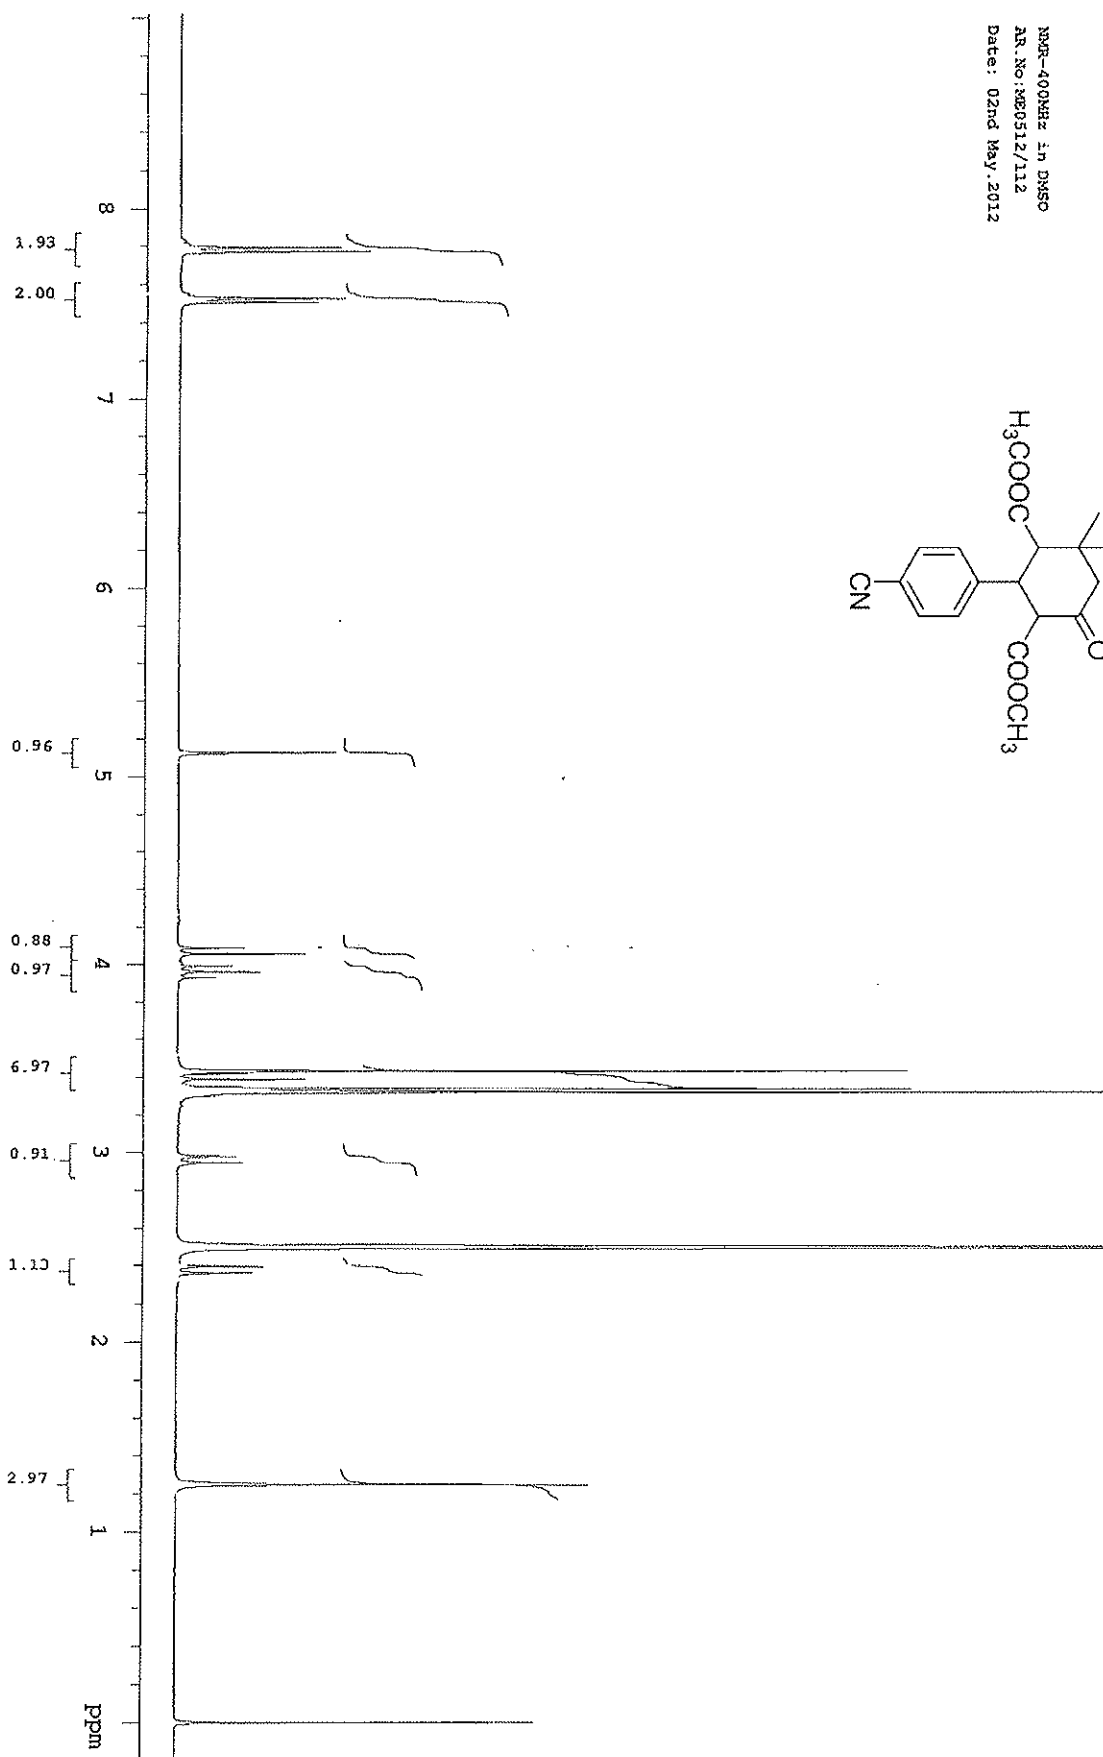



NMR-400MHz in DMSO  
Ac.No:ME0512/2630  
Date: 25th May, 2012

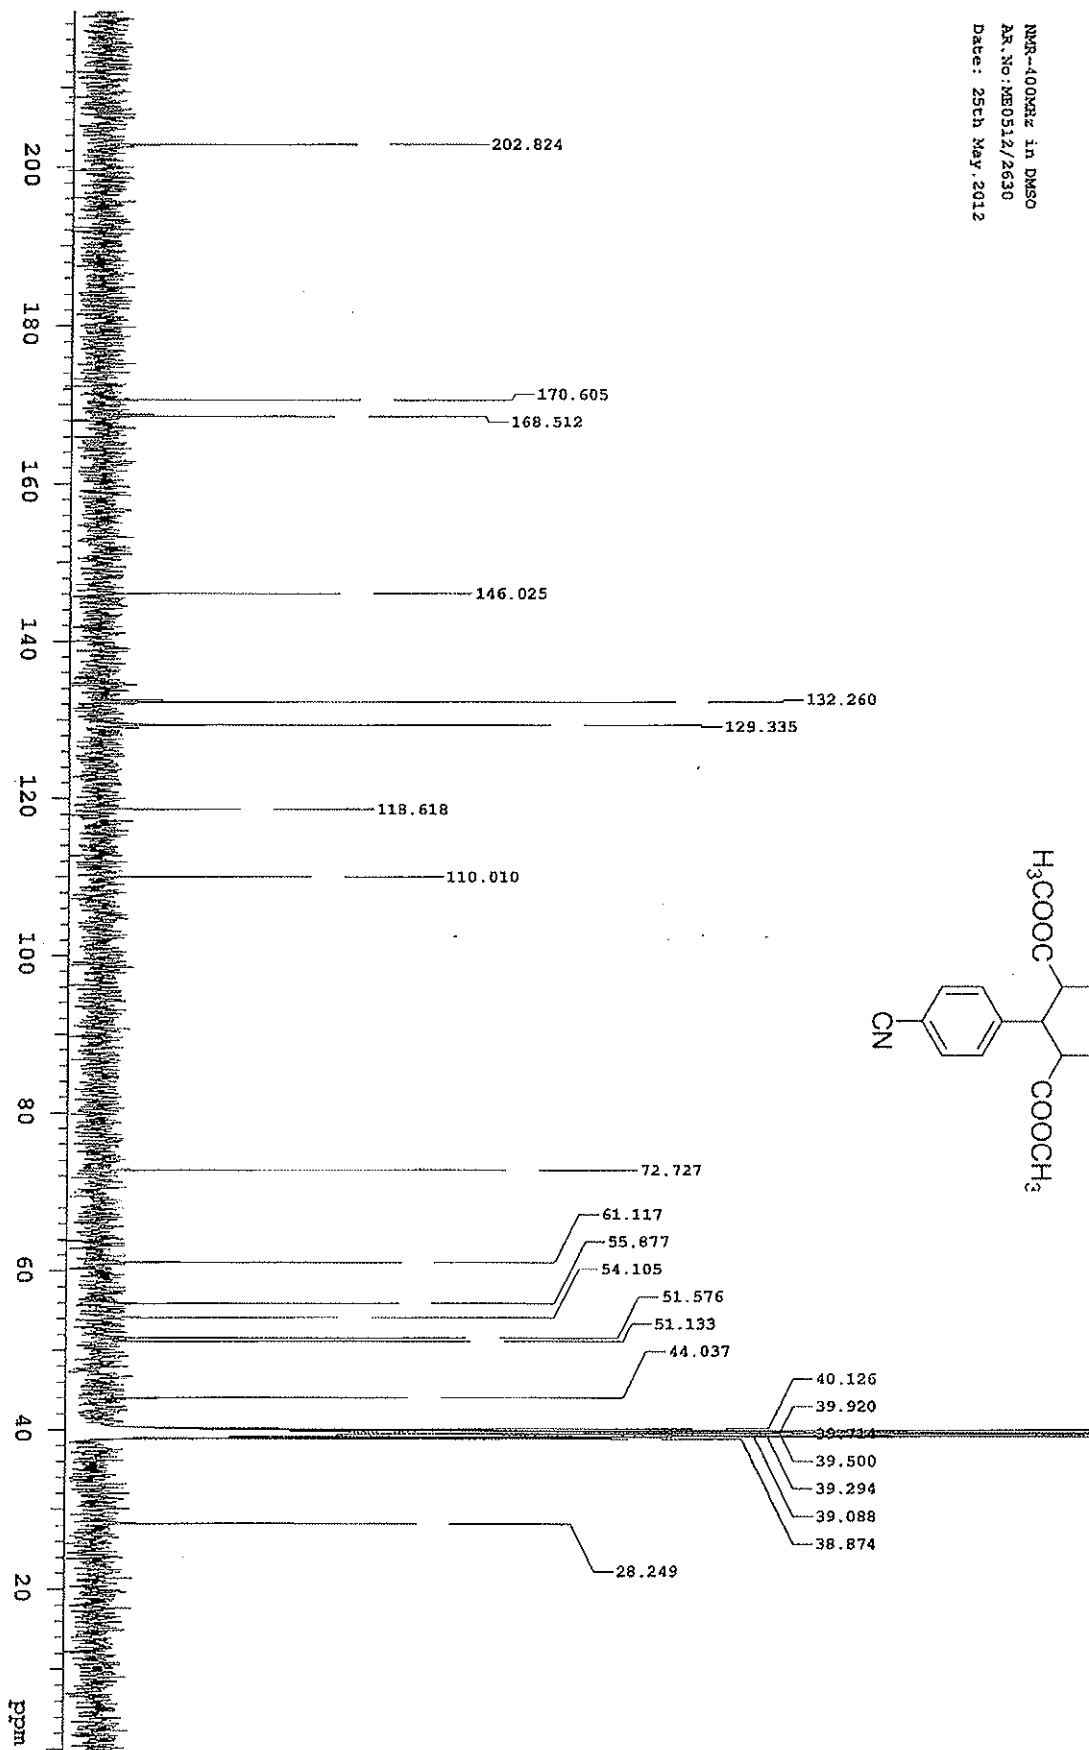

## Single Mass Analysis

Tolerance = 5.0 PPM / DBE: min = -1.0, max = 40.0  
 Element prediction: Off  
 Number of isotope peaks used for 1-FIT = 2

Monoisotopic Mass, Even Electron Ions  
 1:1 formula(e) evaluated with 1 results within limits (up to 5 best isotopic matches for each mass)  
 Elements Used:  
 C: 0-20 H: 0-20 N: 0-1 O: 0-6

Dr.Reddy's Laboratories Ltd, ARD, TDC-1

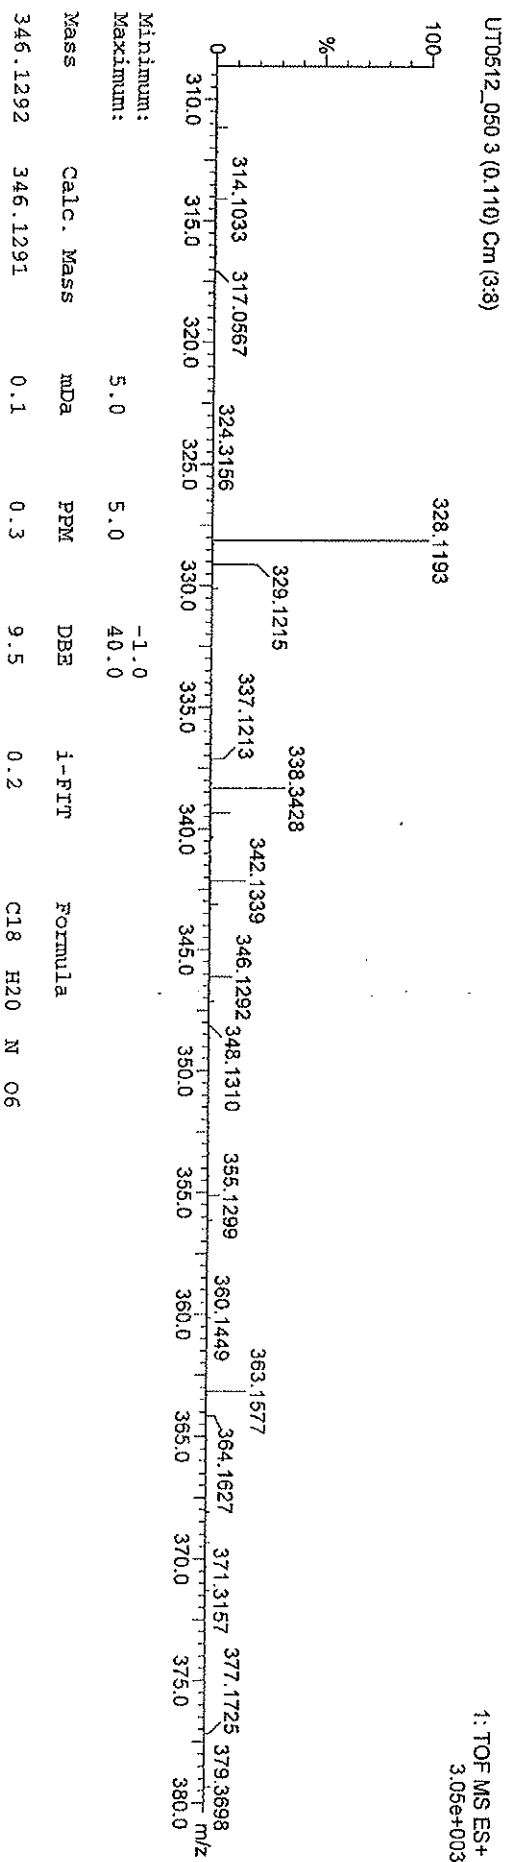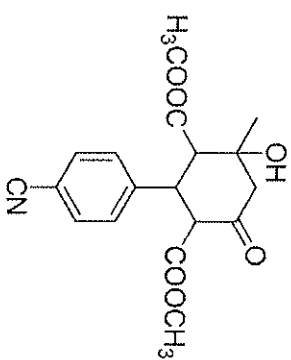

NR-400MHz in DMSO  
Ac.No: KE0512/2584  
Date: 25th May, 2012

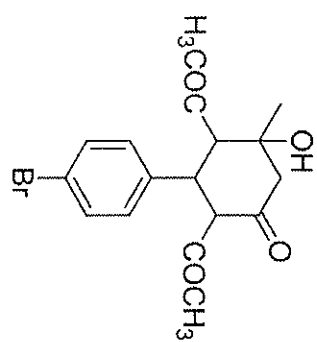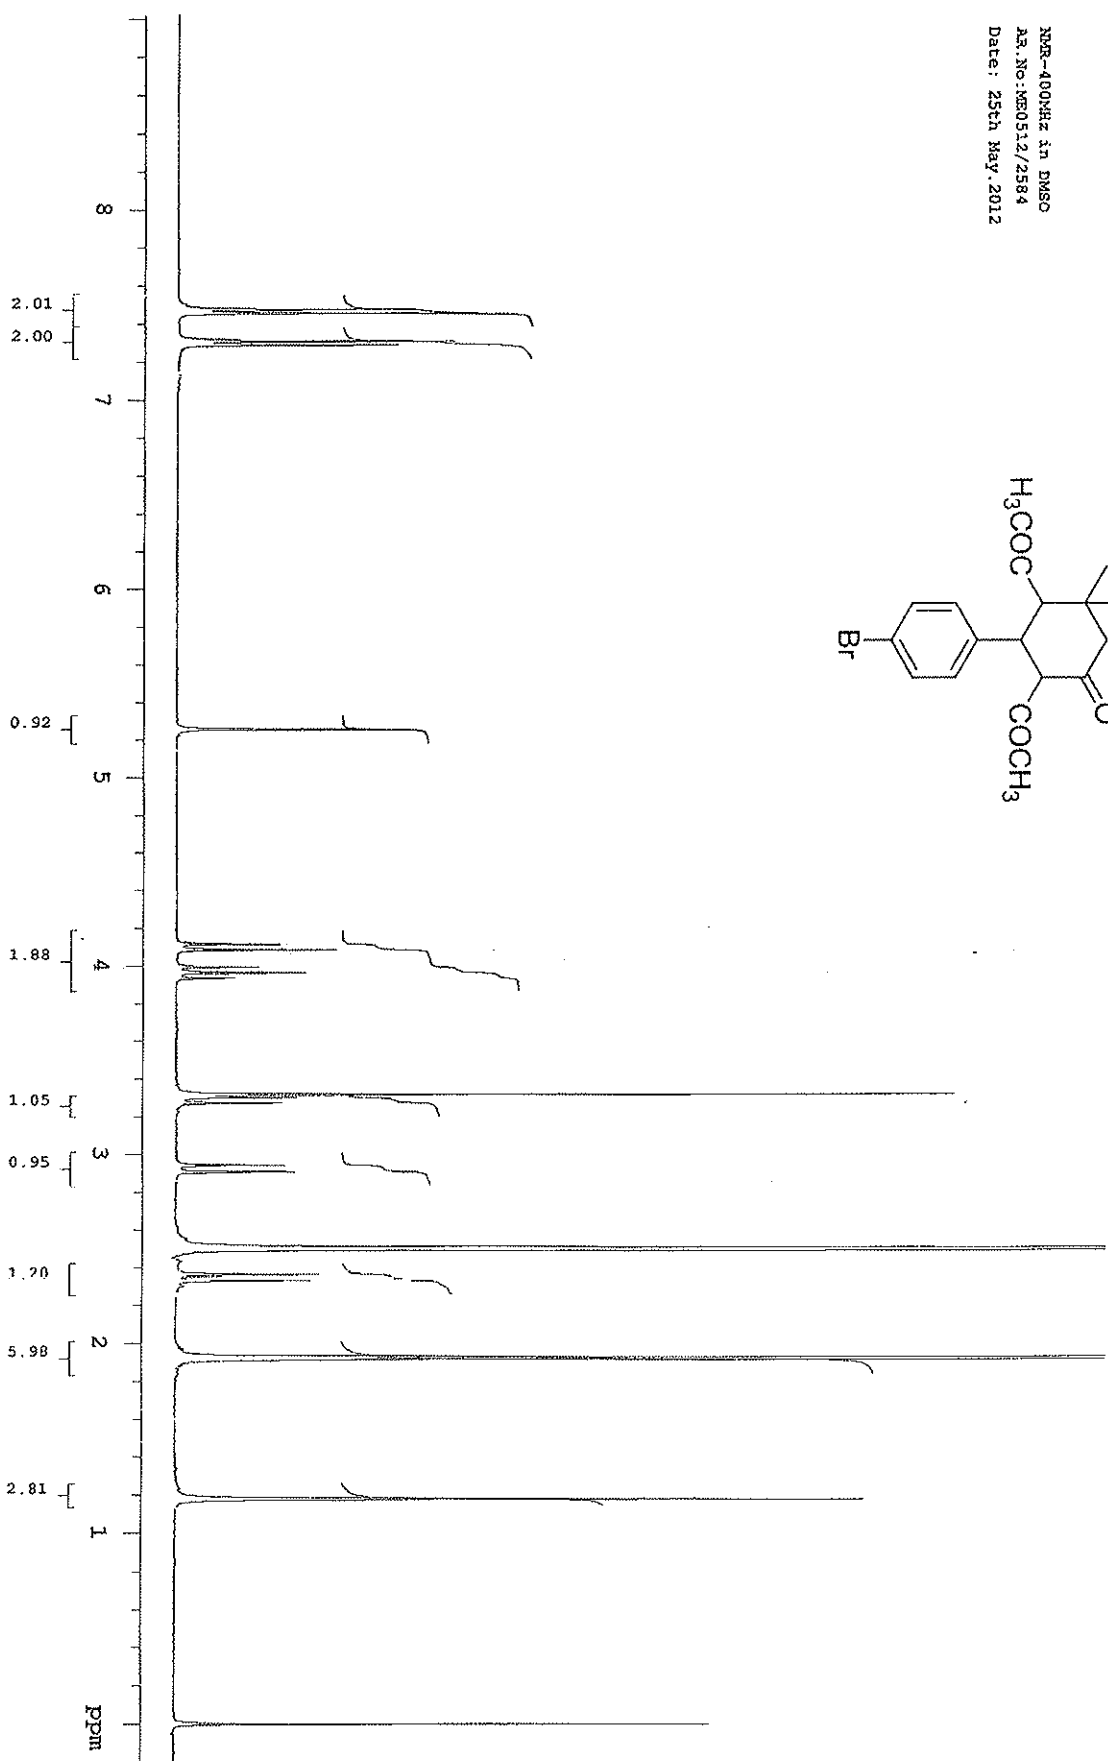

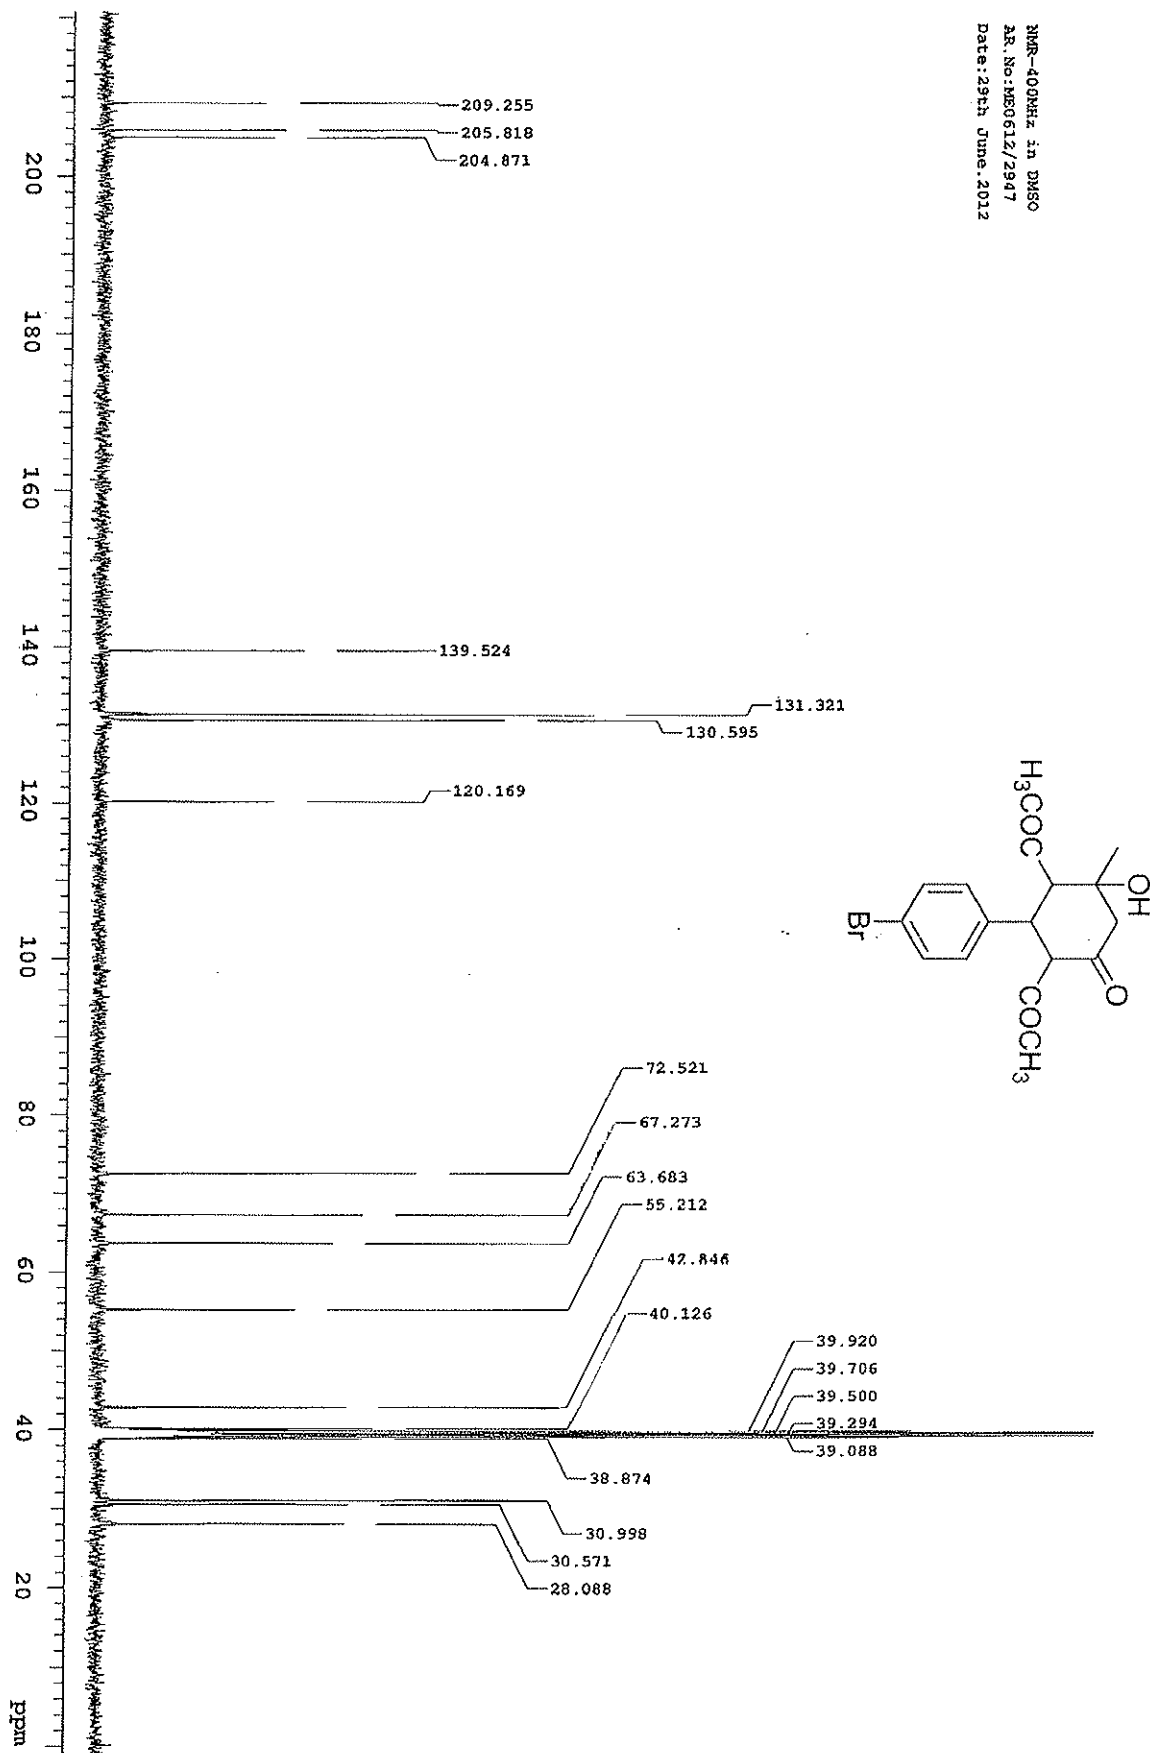

NMR-400MHz in DMSO  
R.N. No: ME0613/2947  
Date: 29th June, 2012

## Single Mass Analysis

Tolerance = 5.0 PPM / DBE: min = -1.0, max = 80.0

Element prediction: Off

Number of isotope peaks used for i-FIT = 3

Monoisotopic Mass, Even Electron Ions

42 formula(e) evaluated with 1 results within limits (up to 4 closest results for each mass)

Elements Used:

C: 0-25 H: 0-25 O: 0-6 Br: 0-2

UT0712\_38 20 (0.367) Cm (20.25)

Dr.Reddy's Laboratories Ltd, ARD,TDC-1

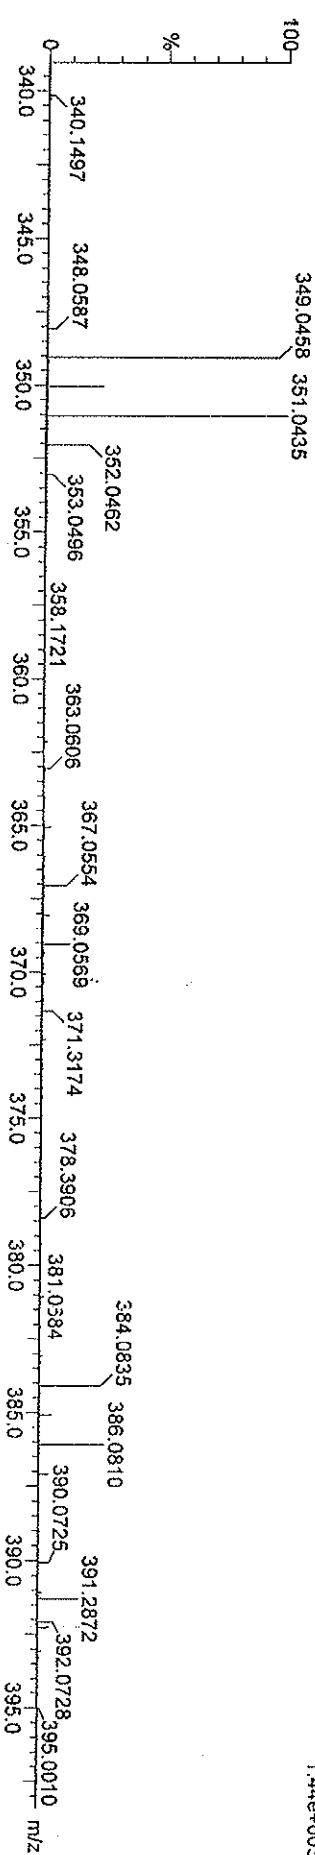1: TOF MS ES+  
1.44e+003Minimum:  
Maximum:5.0    5.0    -1.0  
80.0

| Mass     | Calc. Mass | mDa | PPM | DBE | i-FIT | Formula       |
|----------|------------|-----|-----|-----|-------|---------------|
| 367.0554 | 367.0545   | 0.9 | 2.5 | 7.5 | 2.0   | C17 H20 O4 Br |

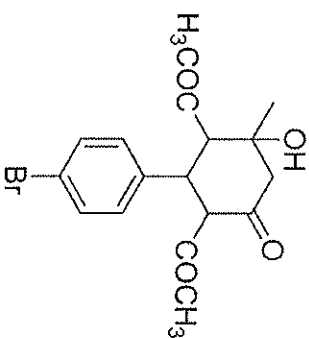

NMR-400MHz in DMSO  
AR.No:ME0512/2583  
Date: 25th May.2012

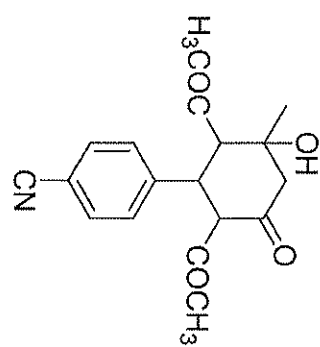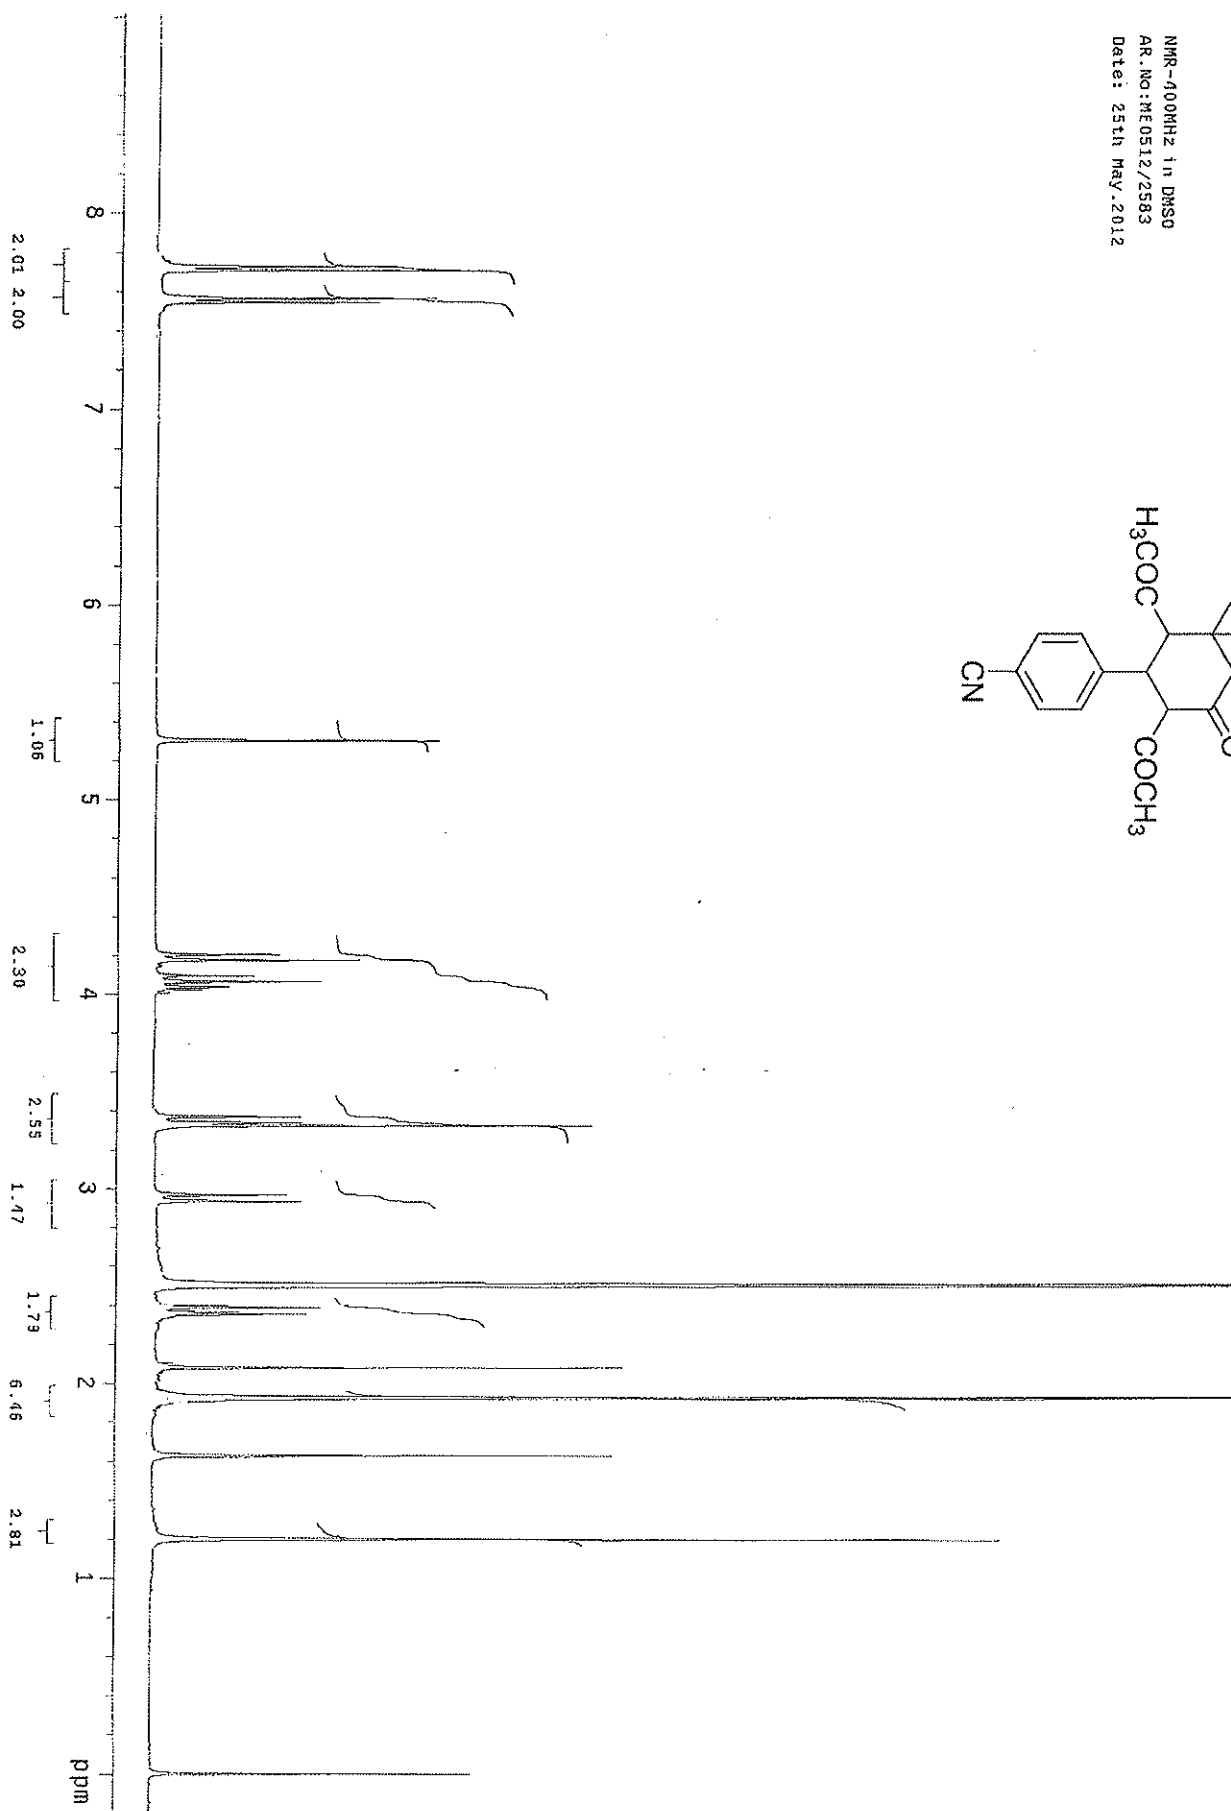

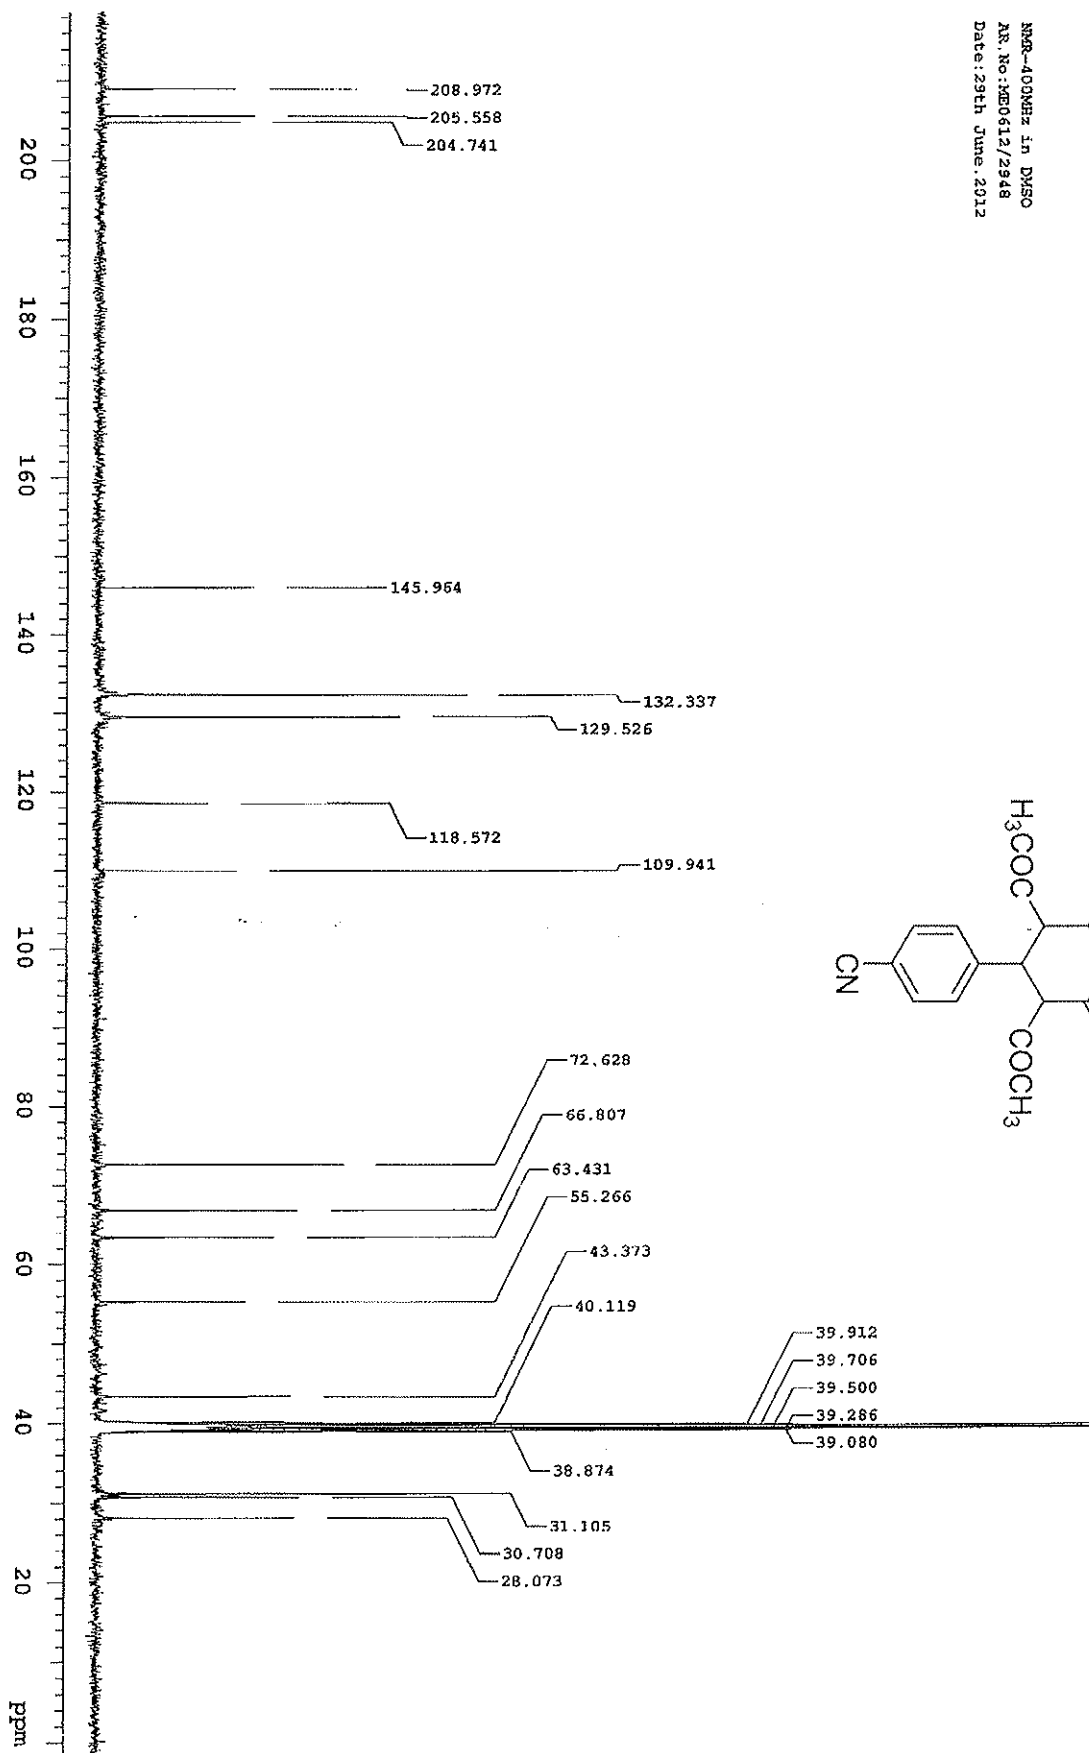

NMR-400MHz in DMSO  
AR. No:ME0612/2948  
Date:29th June, 2012

## Elemental Composition Report

### Single Mass Analysis

Tolerance = 5.0 PPM / DBE: min = -1.0, max = 80.0  
Element prediction: Off  
Number of isotope peaks used for i-FIT = 3

Monoisotopic Mass, Even Electron Ions  
66 formula(e) evaluated with 1 results within limits (up to 4 closest results for each mass)  
Elements Used:

C: 0-30 H: 0-20 N: 0-5 O: 0-5

AZ86/CSAT1/066

UT0712\_39.21 (0.399) Cm (21:25)

Dr.Reddy's Laboratories Ltd, ARD, TDC-1

1: TOF MS ES+  
3.84e+002

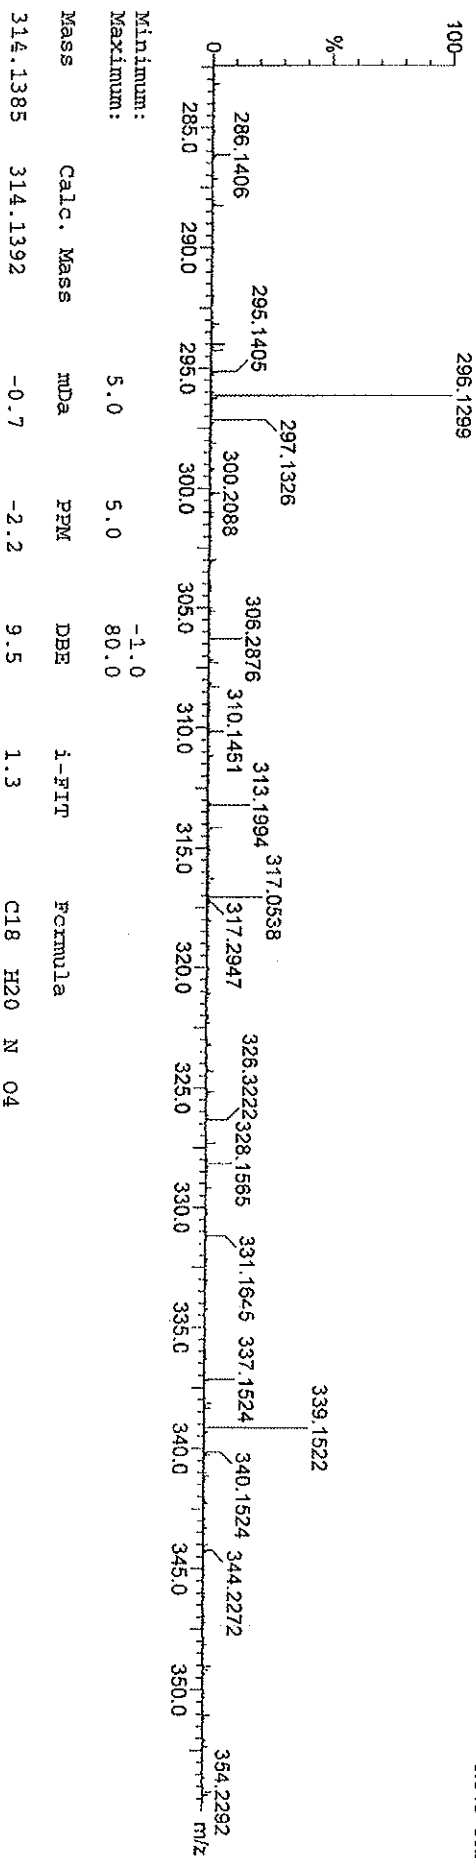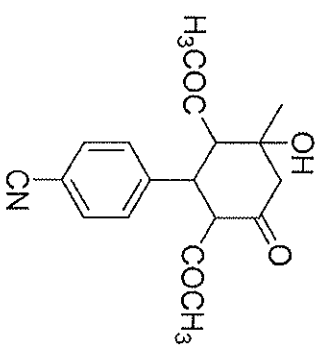



NMR-400MHz in DMSO  
R.R.No:ME0612/398  
Date:05th June, 2012

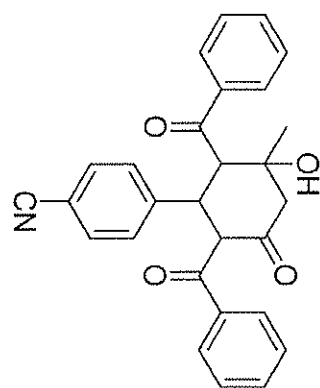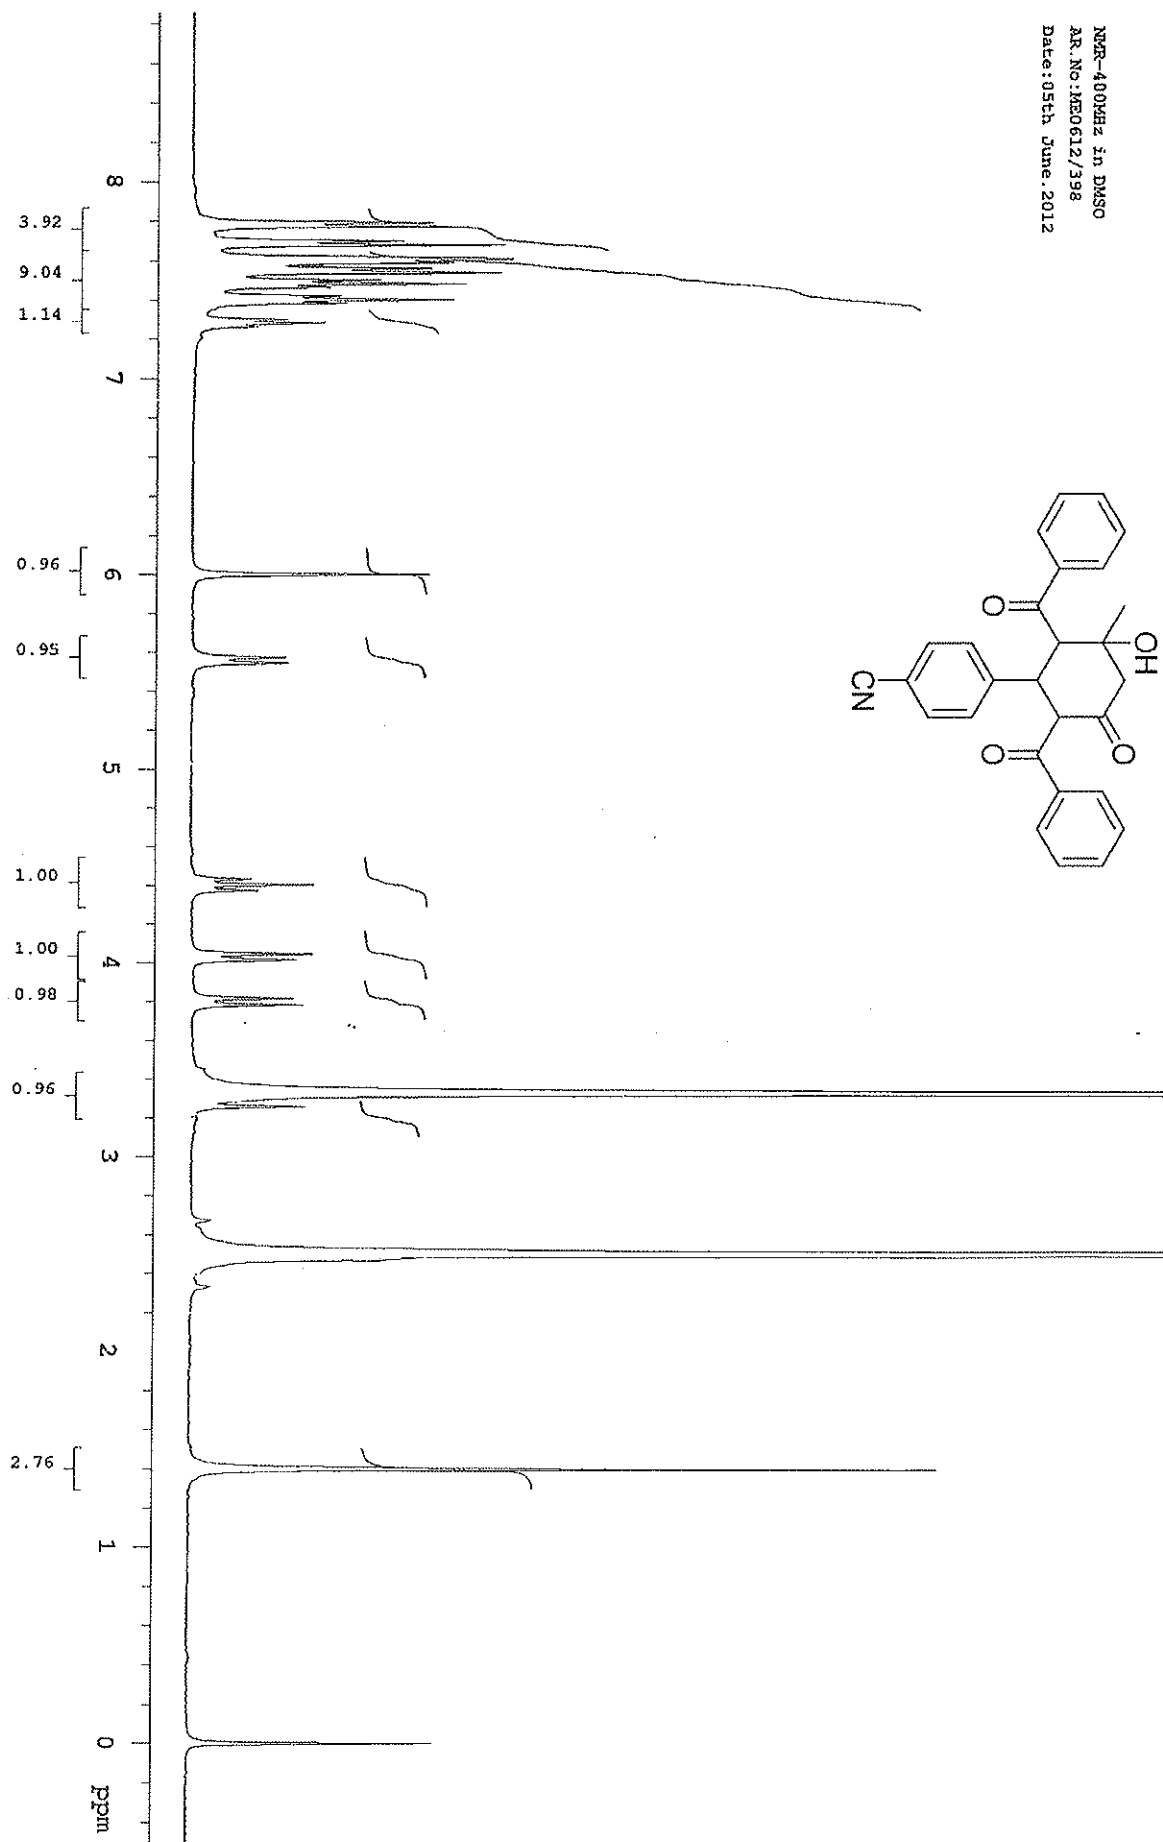

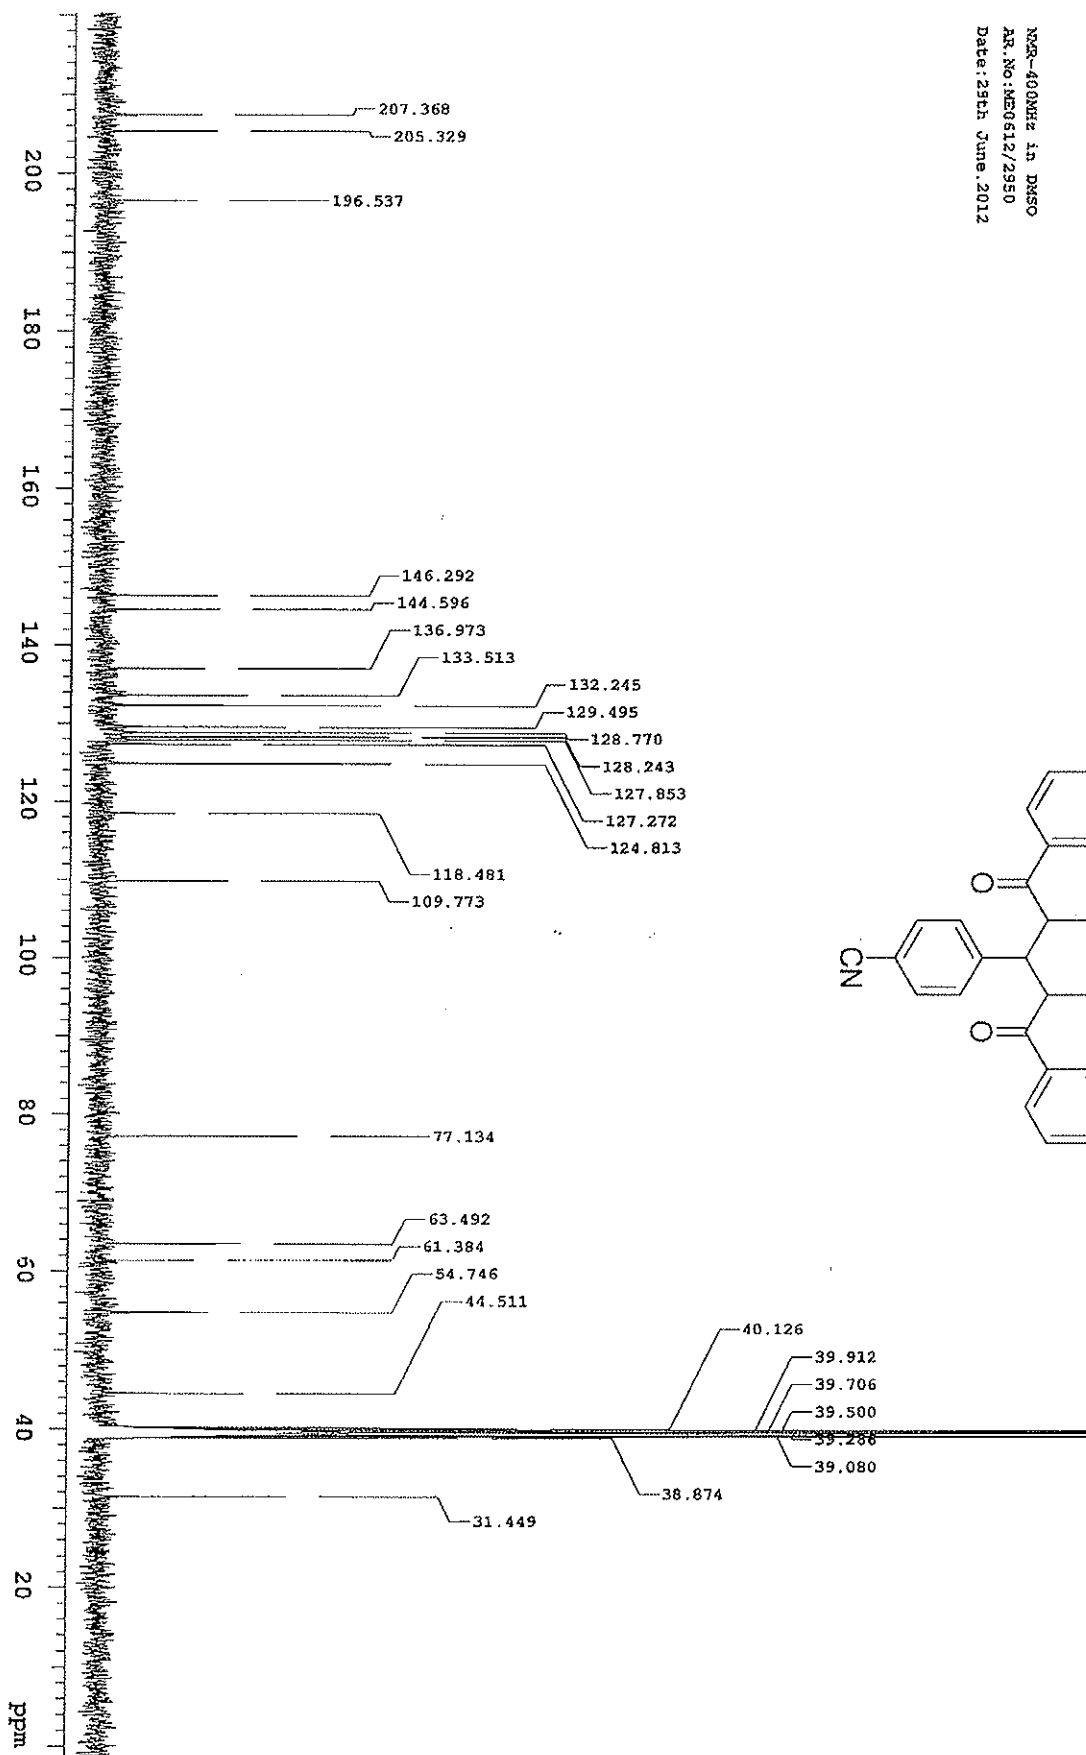

13C-400MHz in DMSO  
AR.No:ME0612/2950  
Date: 29th June, 2012

**Single Mass Analysis**

Tolerance = 5.0 PPM / DBE: min = -1.0, max = 80.0  
 Element prediction: Off  
 Number of isotope peaks used for i-FIT = 3

Monoisotopic Mass, Even Electron Ions  
 16 formula(e) evaluated with 1 results within limits (up to 4 best isotopic matches for each mass)

Elements Used:

C: 0-30 H: 0-30 N: 0-2 O: 0-4

A786/CSAT1/071

UT0712\_34 16 (0.292) Cm (16.24)

Dr.Reddy's Laboratories Ltd, ARD, TDC-1

1: TOF MS ES+  
 3.35e+002

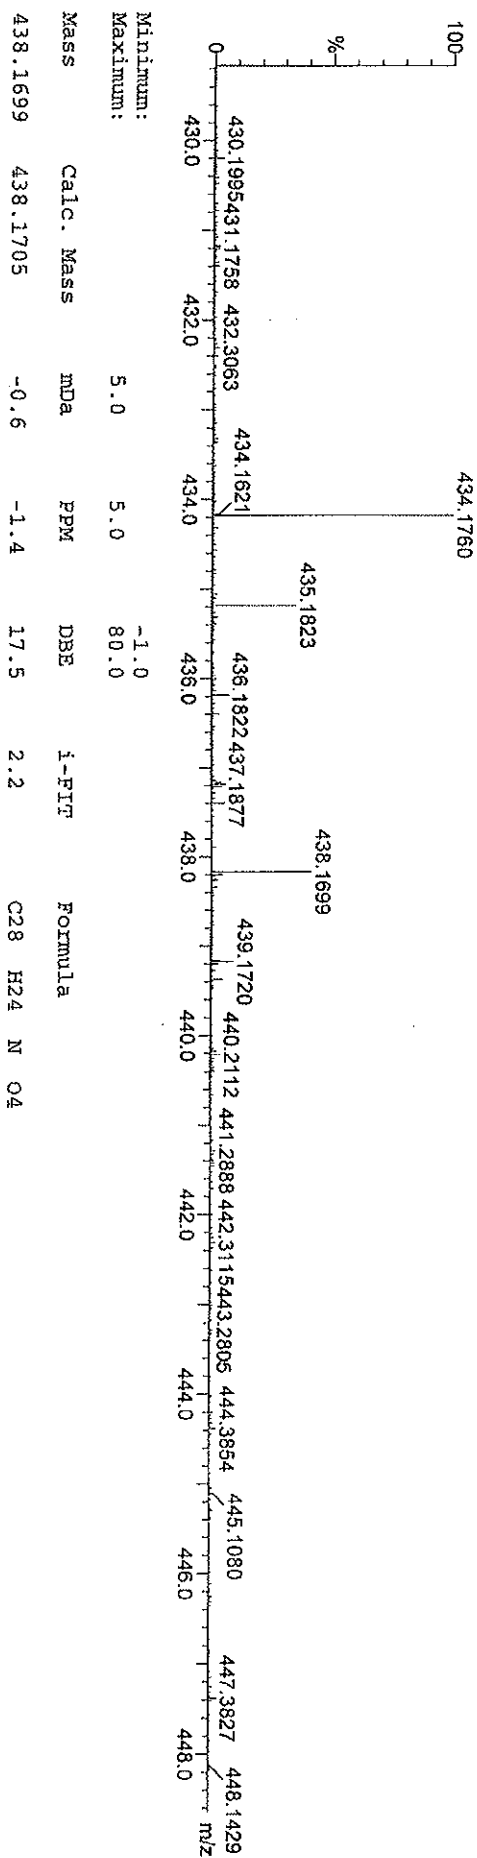

Minimum: 5.0 PPM -1.0 DBE  
 Maximum: 5.0 PPM 80.0 DBE

| Mass     | Calc. Mass | MDA  | PPM  | DBE  | i-FIT | Formula      |
|----------|------------|------|------|------|-------|--------------|
| 438.1699 | 438.1705   | -0.6 | -1.4 | 17.5 | 2.2   | C28 H24 N O4 |

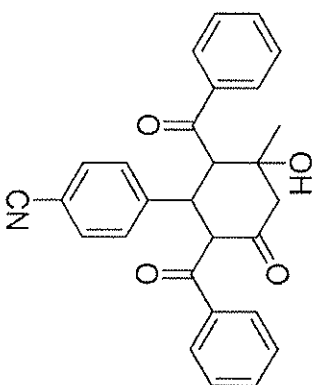

NMR-400MHz in DMSO  
A.R. No: NE0612/397  
Date: 05th June, 2012

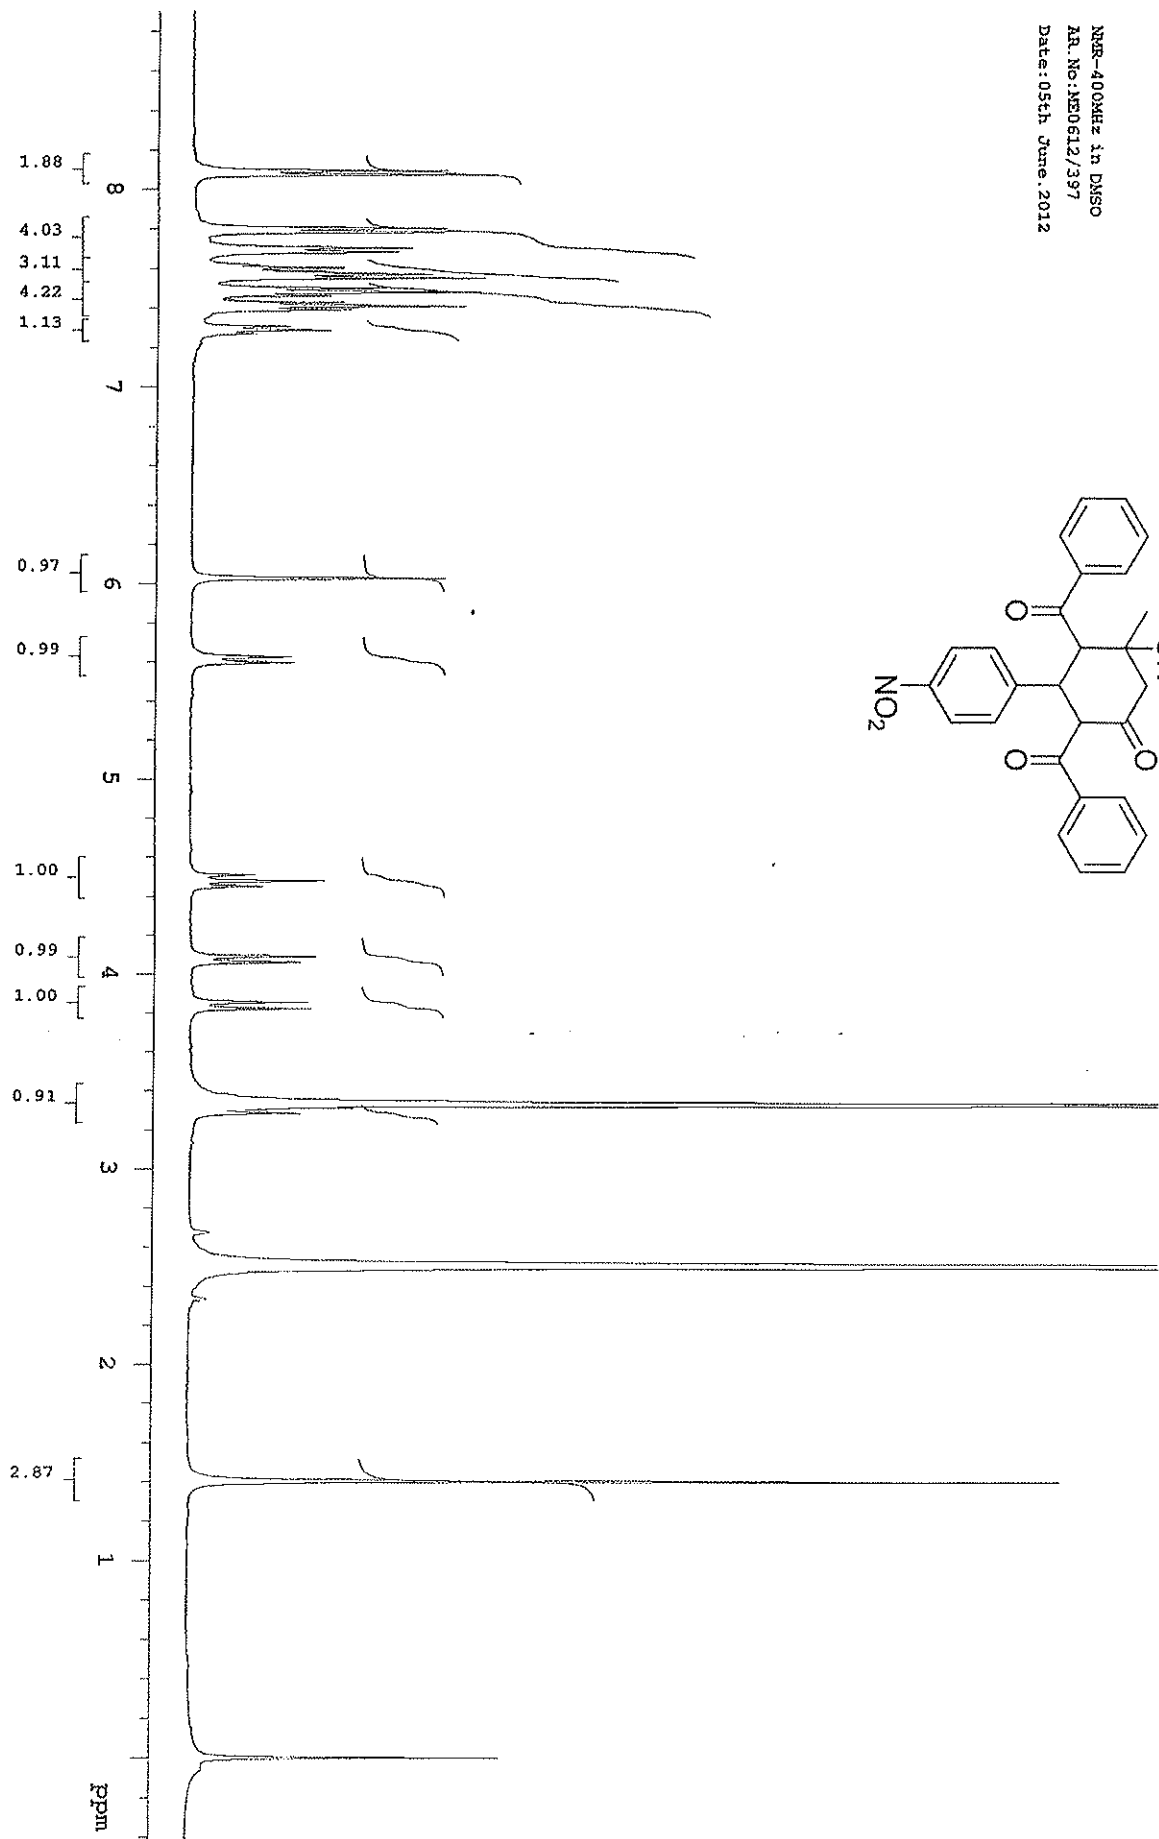

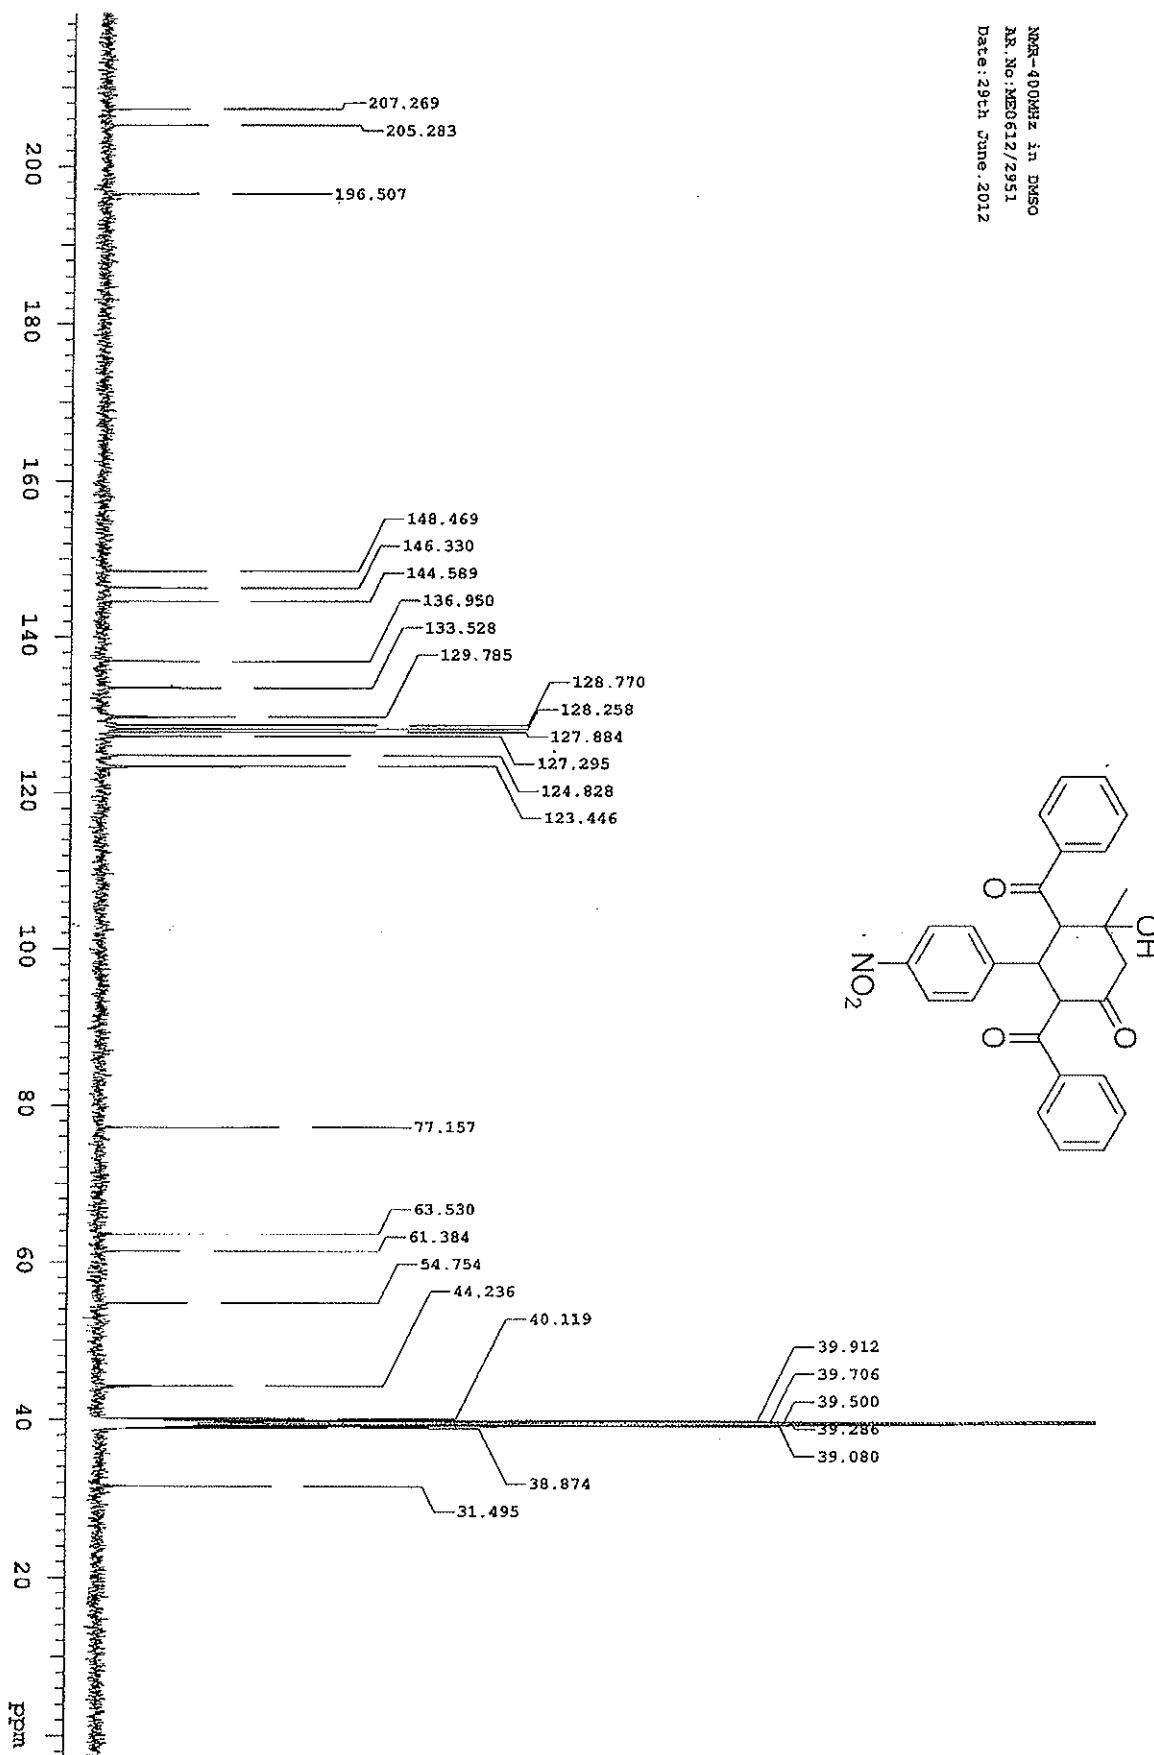

NMR-400MHz in DMSO  
Ac.No:ME0612/2951  
Date:29th June,2012

### Elemental Composition Report

#### Single Mass Analysis

Tolerance = 5.0 PPM / DBE: min = -1.0, max = 80.0  
Element prediction: Off  
Number of isotope peaks used for i-FIT = 3

Monoisotopic Mass, Even Electron Ions  
40 formula(e) evaluated with 1 results within limits (up to 4 best isotopic matches for each mass)

Elements Used:  
C: 0-30 H: 0-30 N: 0-2 O: 0-8

UT0712\_37 16 (0.293) Cm (9.23)

Dr.Reddy's Laboratories Ltd, ARD, TDC-1

1: TOF MS ES+  
1.95e+003

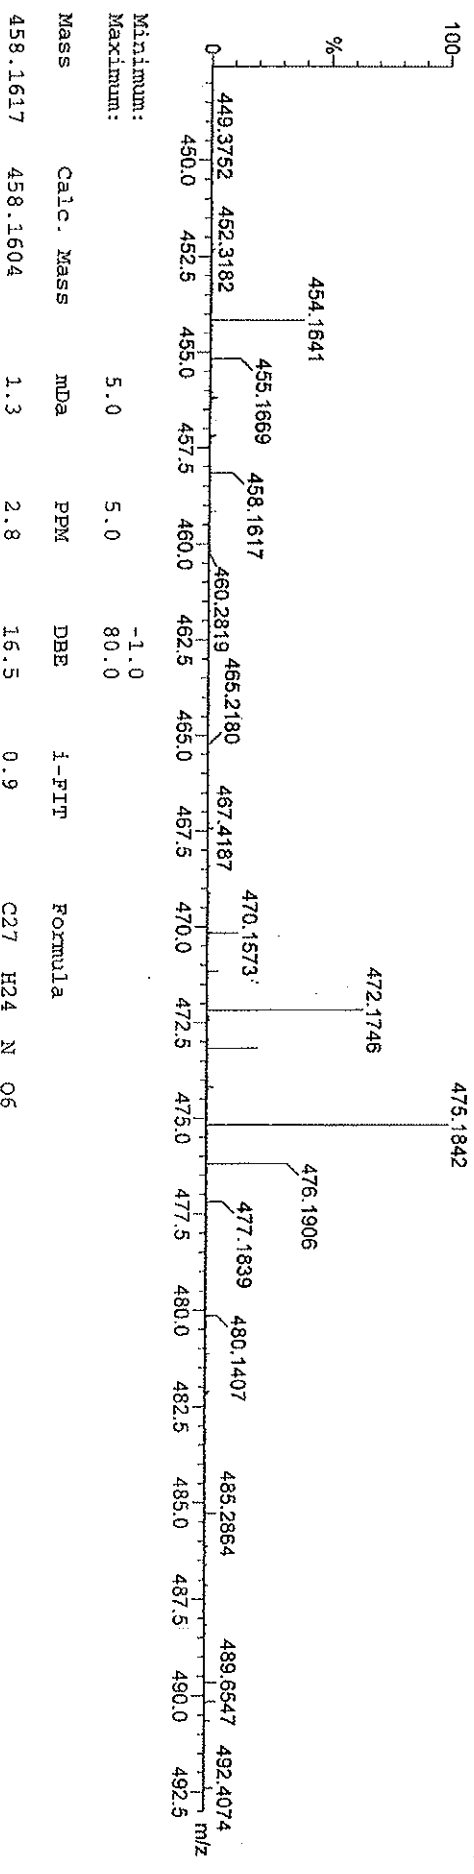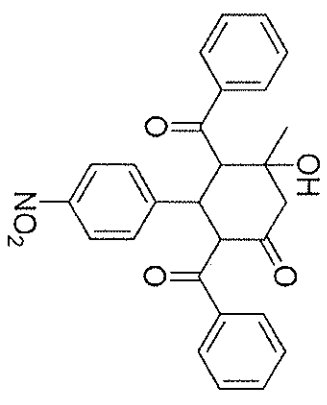

400MHz in DMSO  
AR.No:ME1212/794  
Date: 10th Dec, 2012

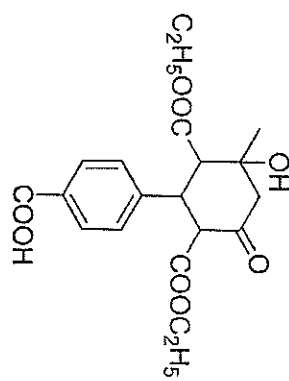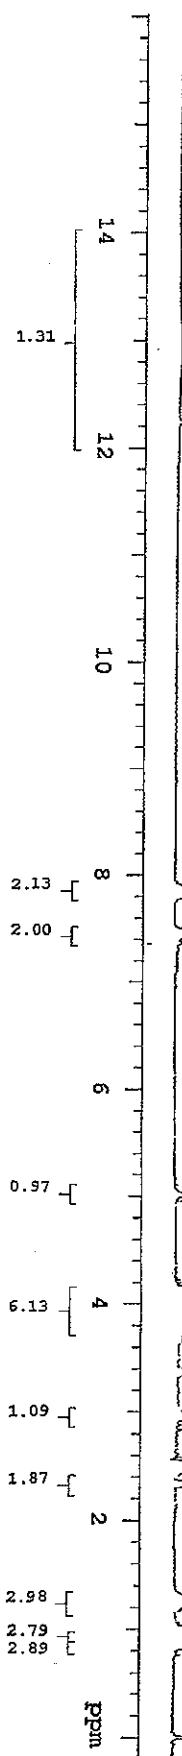

## Elemental Composition Report

### Single Mass Analysis

Tolerance = 10.0 PPM / DBE: min = -1.5, max = 80.0  
Element prediction: Off  
Number of isotope peaks used for i-FIT = 2

Monoisotopic Mass, Even Electron Ions  
29 formula(e) evaluated with 1 results within limits (up to 5 closest results for each mass)  
Elements Used:  
C: 0-22 H: 0-27 N: 0-1 O: 0-10

UT1212\_073 12 (0.420) Cm (12:17-48:52x0.010)

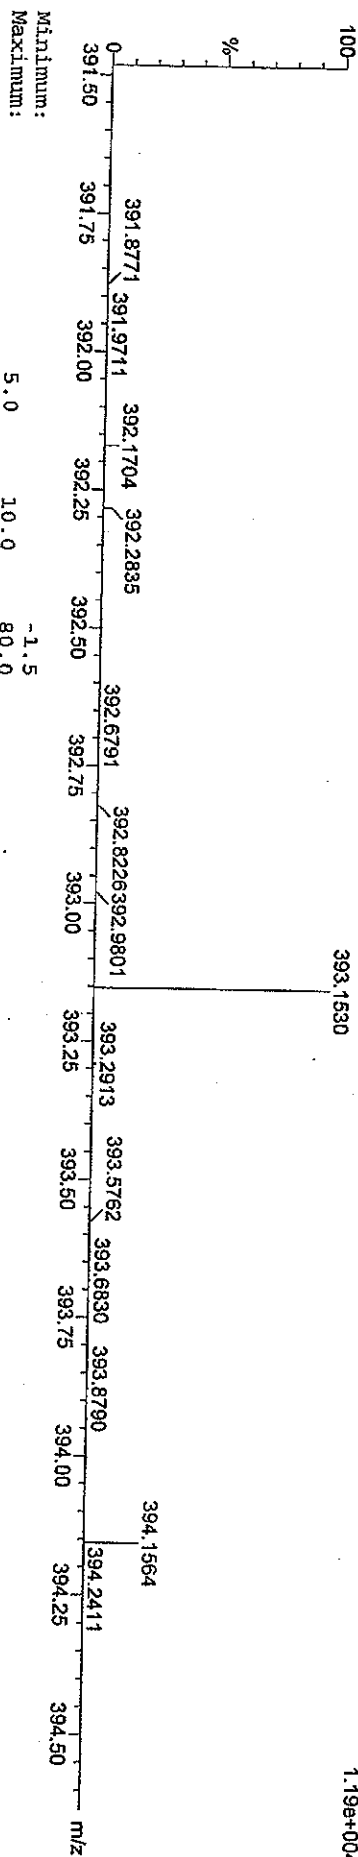

1: TOF MS ES+  
1.19e+004

| Mass     | Calc. Mass | mDa  | PPM  | DBE | i-FIT | Formula    |
|----------|------------|------|------|-----|-------|------------|
| 393.1530 | 393.1549   | -1.9 | -4.8 | 8.5 | 1.1   | C20 H25 O8 |

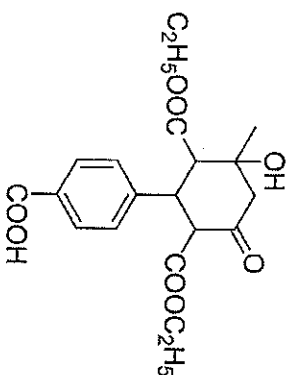



NMR-400MHz in CDCl<sub>3</sub>  
Ac. No: ME0512/2918  
Date: 29th May 2012

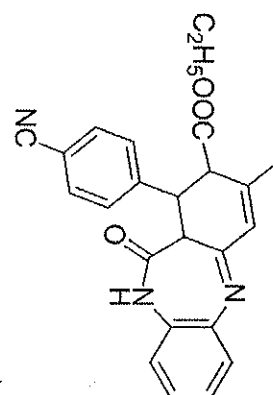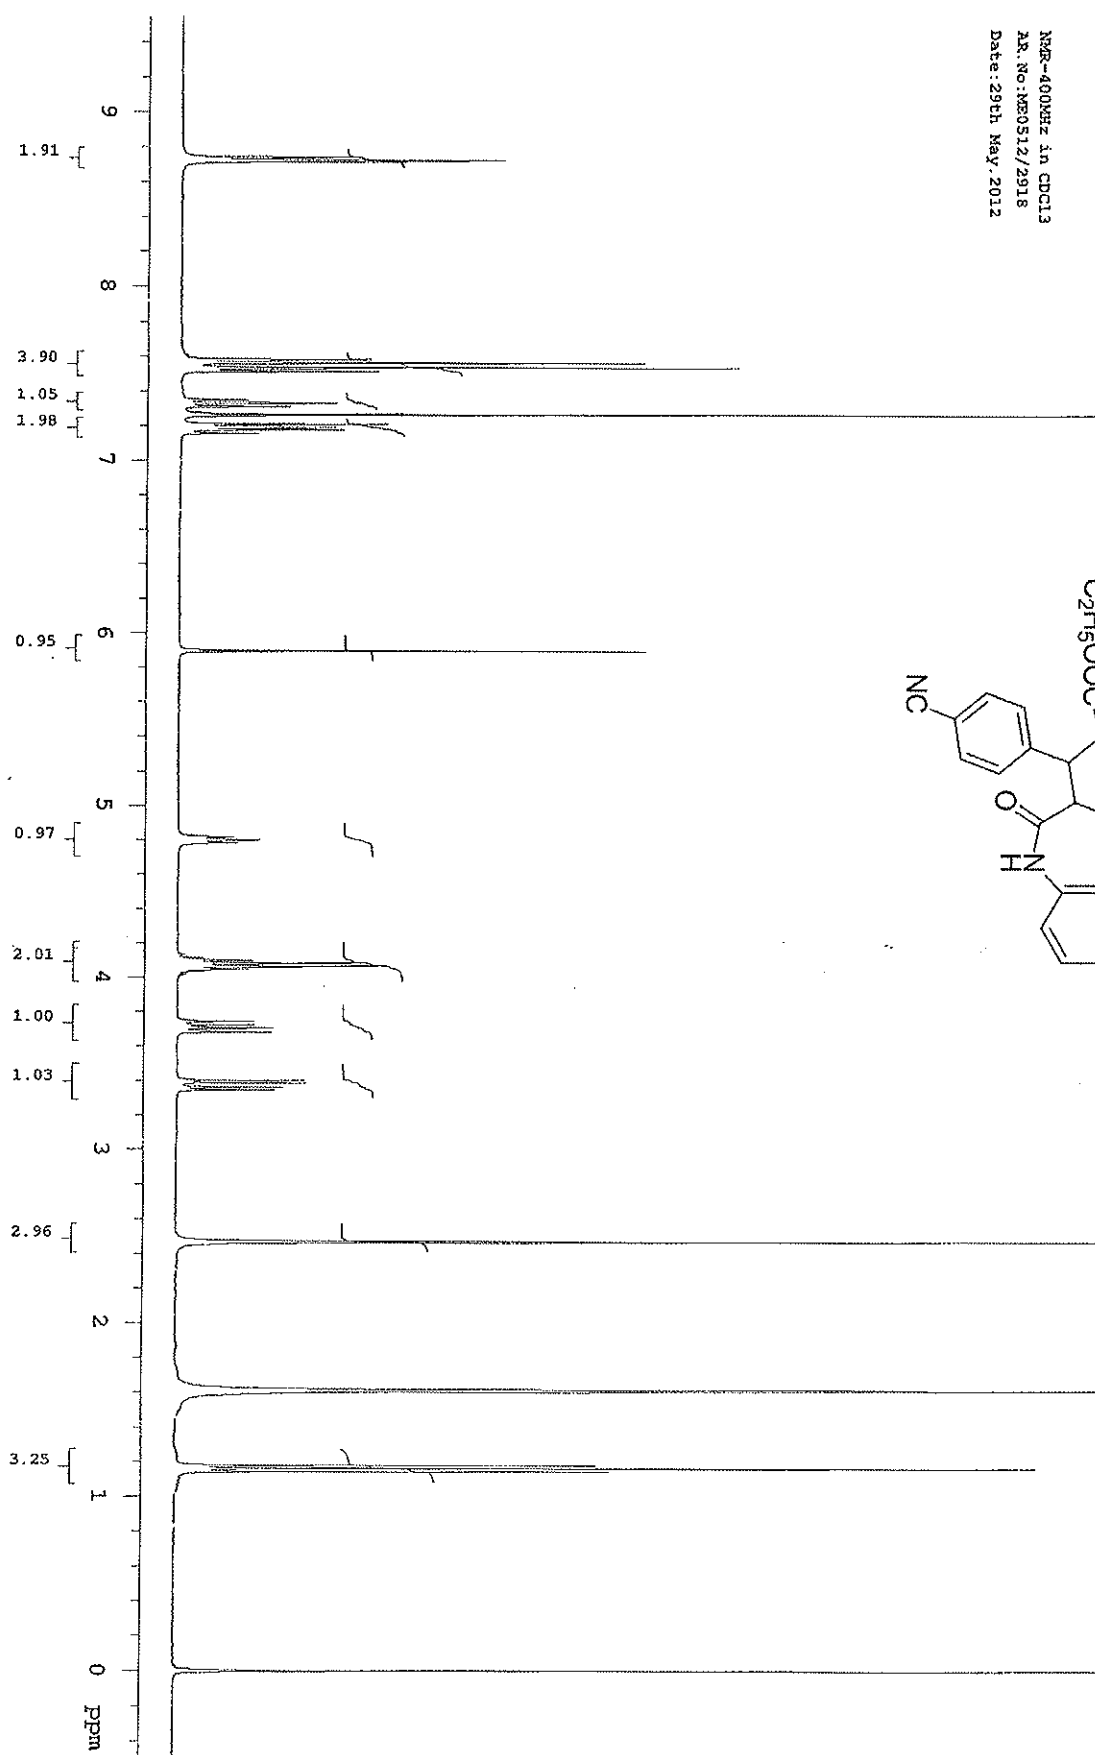

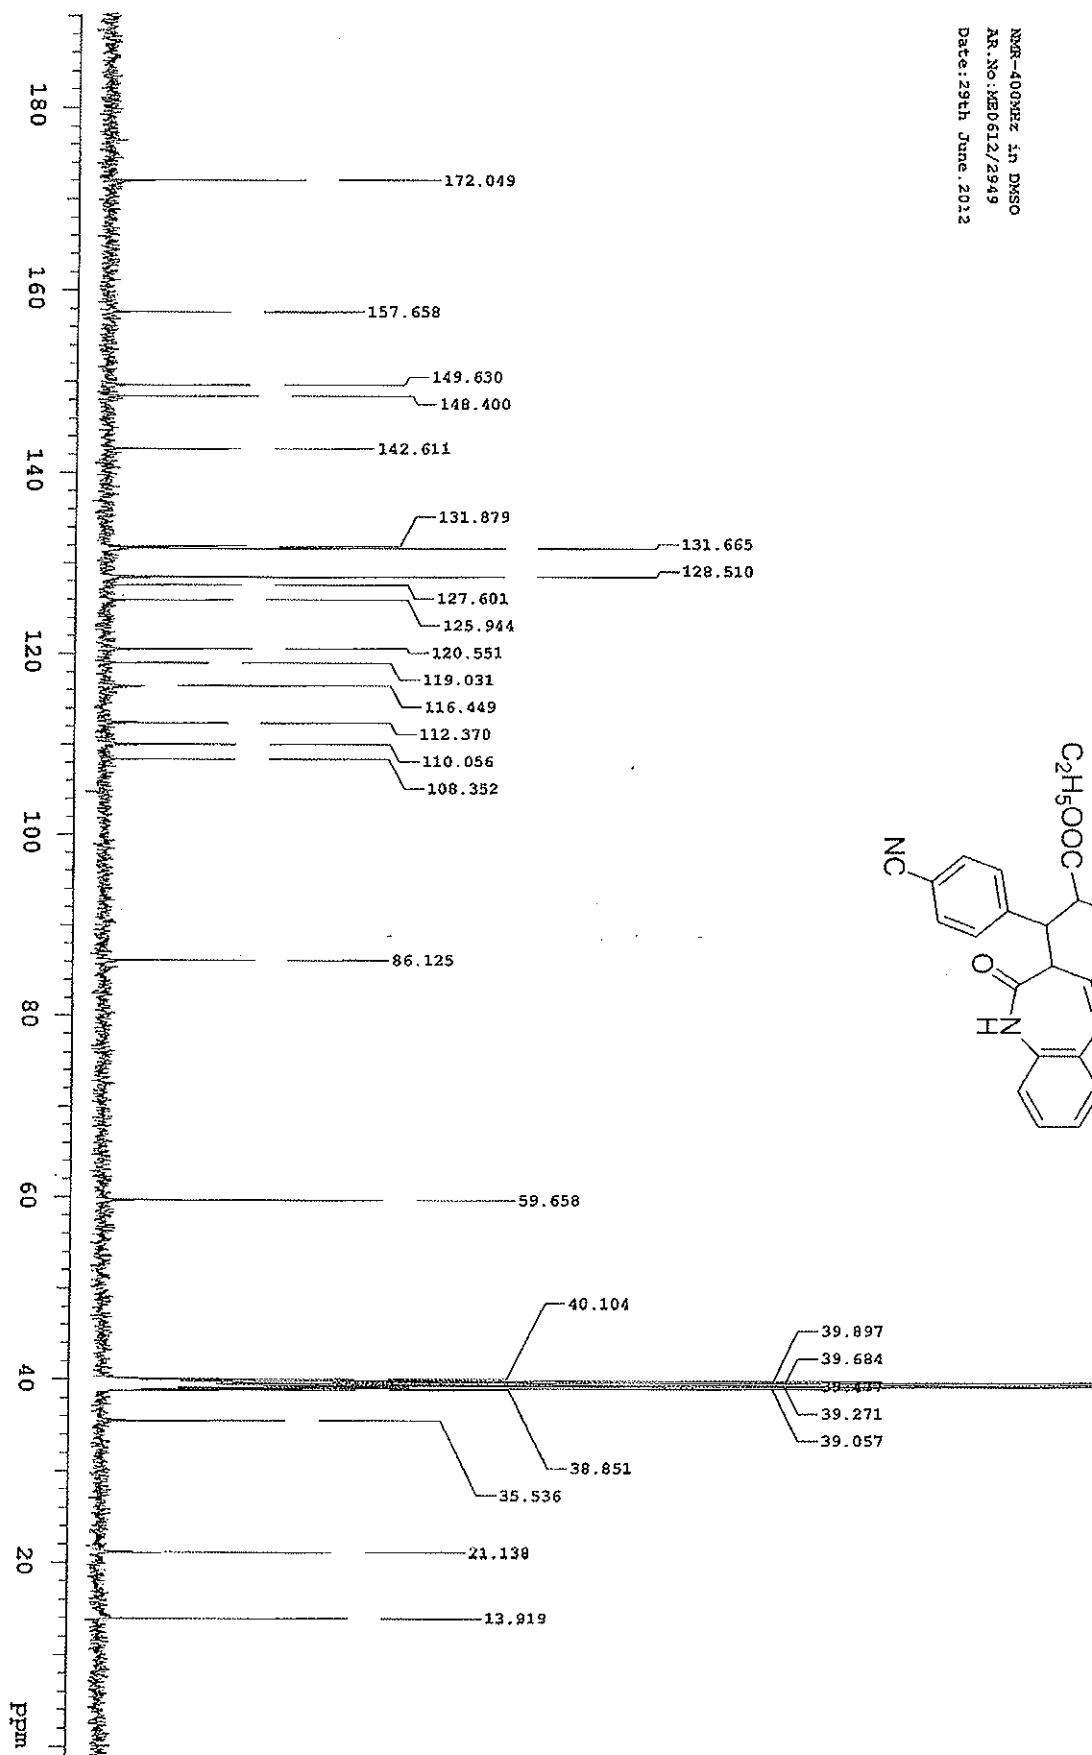

NRX-400MHz in DMSO  
AR.No:ME0612/2949  
Date: 29th June, 2012

**Single Mass Analysis**

Tolerance = 5.0 PPM / DBE: min = -1.0, max = 80.0

Element prediction: Off

Number of isotope peaks used for i-FIT = 3

Monoisotopic Mass, Even Electron Ions

126 formula(e) evaluated with 1 results within limits (up to 4 best isotopic matches for each mass)

Elements Used:

C: 0-35 H: 0-40 N: 0-5 O: 0-5

UT0712\_67 19 (0.353) Cm (19.22)

Dr.Reddy's Laboratories Ltd, ARD,TDC-1

1: TOF MS ES+  
2.09e+004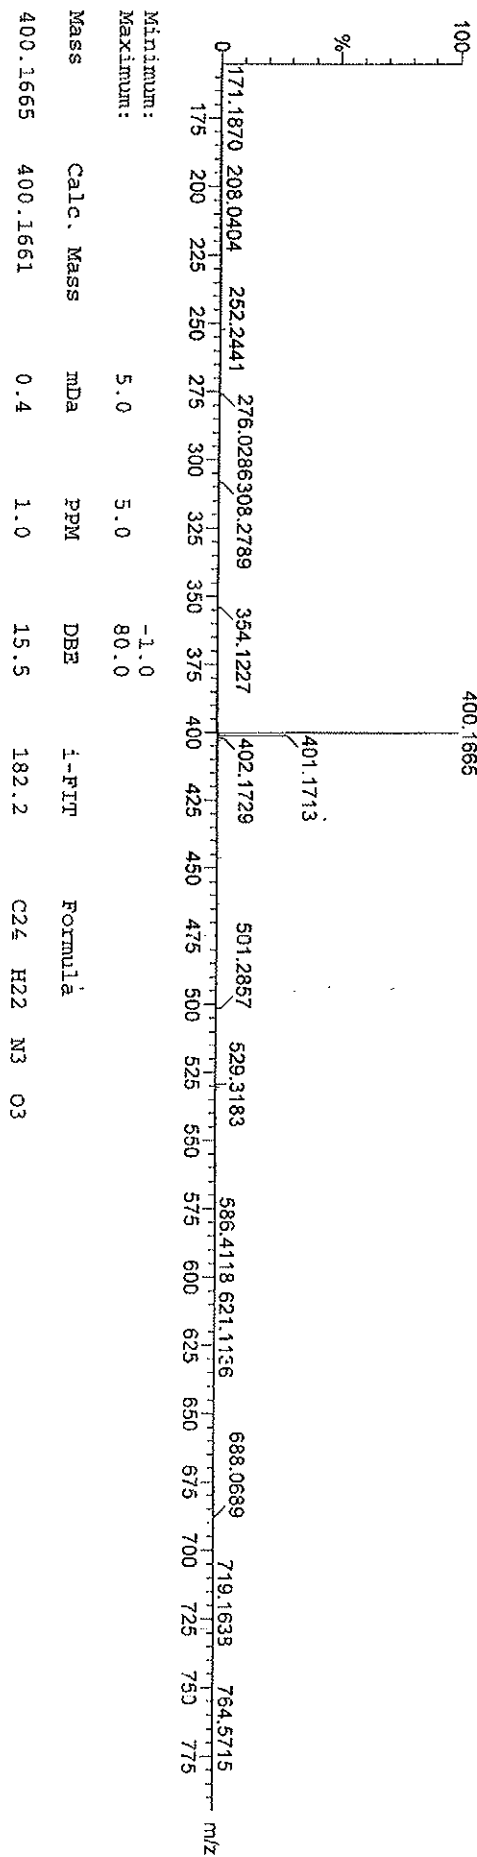

Minimum:

Maximum: 5.0 5.0 -1.0

| Mass     | Calc. Mass | MDA | PPM | DBE  | i-FIT | Formula       |
|----------|------------|-----|-----|------|-------|---------------|
| 400.1665 | 400.1661   | 0.4 | 1.0 | 15.5 | 182.2 | C24 H22 N3 O3 |

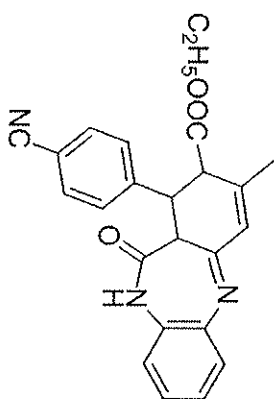

### SAMPLE INFORMATION

|                  |                 |                   |                         |
|------------------|-----------------|-------------------|-------------------------|
| Sample Type      | : Unknown       | Acquired By       | : System                |
| Injection Volume | : 61            | Date Acquired     | : 10/3/2012 5:53:59 PM  |
| Vial no          | : 10.00 ul      | Channel Name      | : PDA 254.0 nm          |
| Run Time         | : 40.00 Minutes | Acq Method Set    | : CHIRAL                |
| System Name      | : HPLC_005_PDA  | Date Processed    | : 10/4/2012 11:57:20 AM |
| Sample Set Name  | : 12100302      | Project Name      | : Alliance_005_OCT_2012 |
| Injection #      | : 1             | Processing Method | : A                     |

### HPLC CONDITIONS

Column : chiral pak AD-H(250\*4.6)mm5µm  
Mobile\_phase : Ethanol:MeOH:DEA(800:200:1)  
Diluent : DCM  
Flow rate : 0.5 mL/min,  
Column temp : 27 °C, Inj vol:5µl  
Wavelength : 254.0 nm

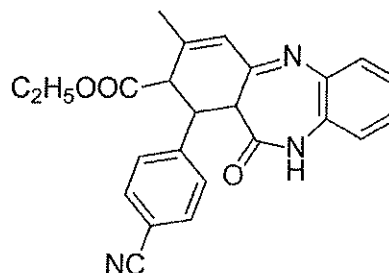

### Auto-Scaled Chromatogram

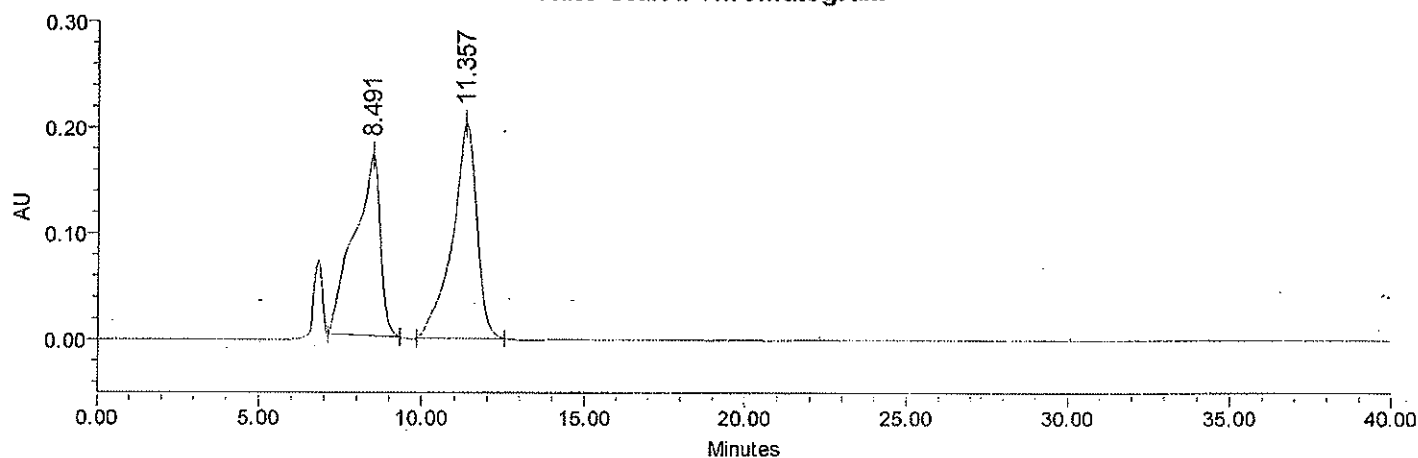

### Peak Results

| Name | RT     | Area     | % Area |
|------|--------|----------|--------|
| 1    | 8.491  | 9556836  | 47.57  |
| 2    | 11.357 | 10532450 | 52.43  |

NMR-400MHz 1h CDCl3  
R.R.No:ME0712/105  
Date: 02nd July2012

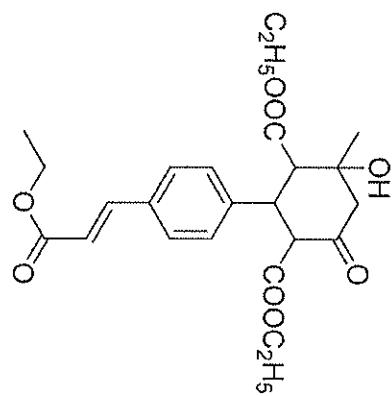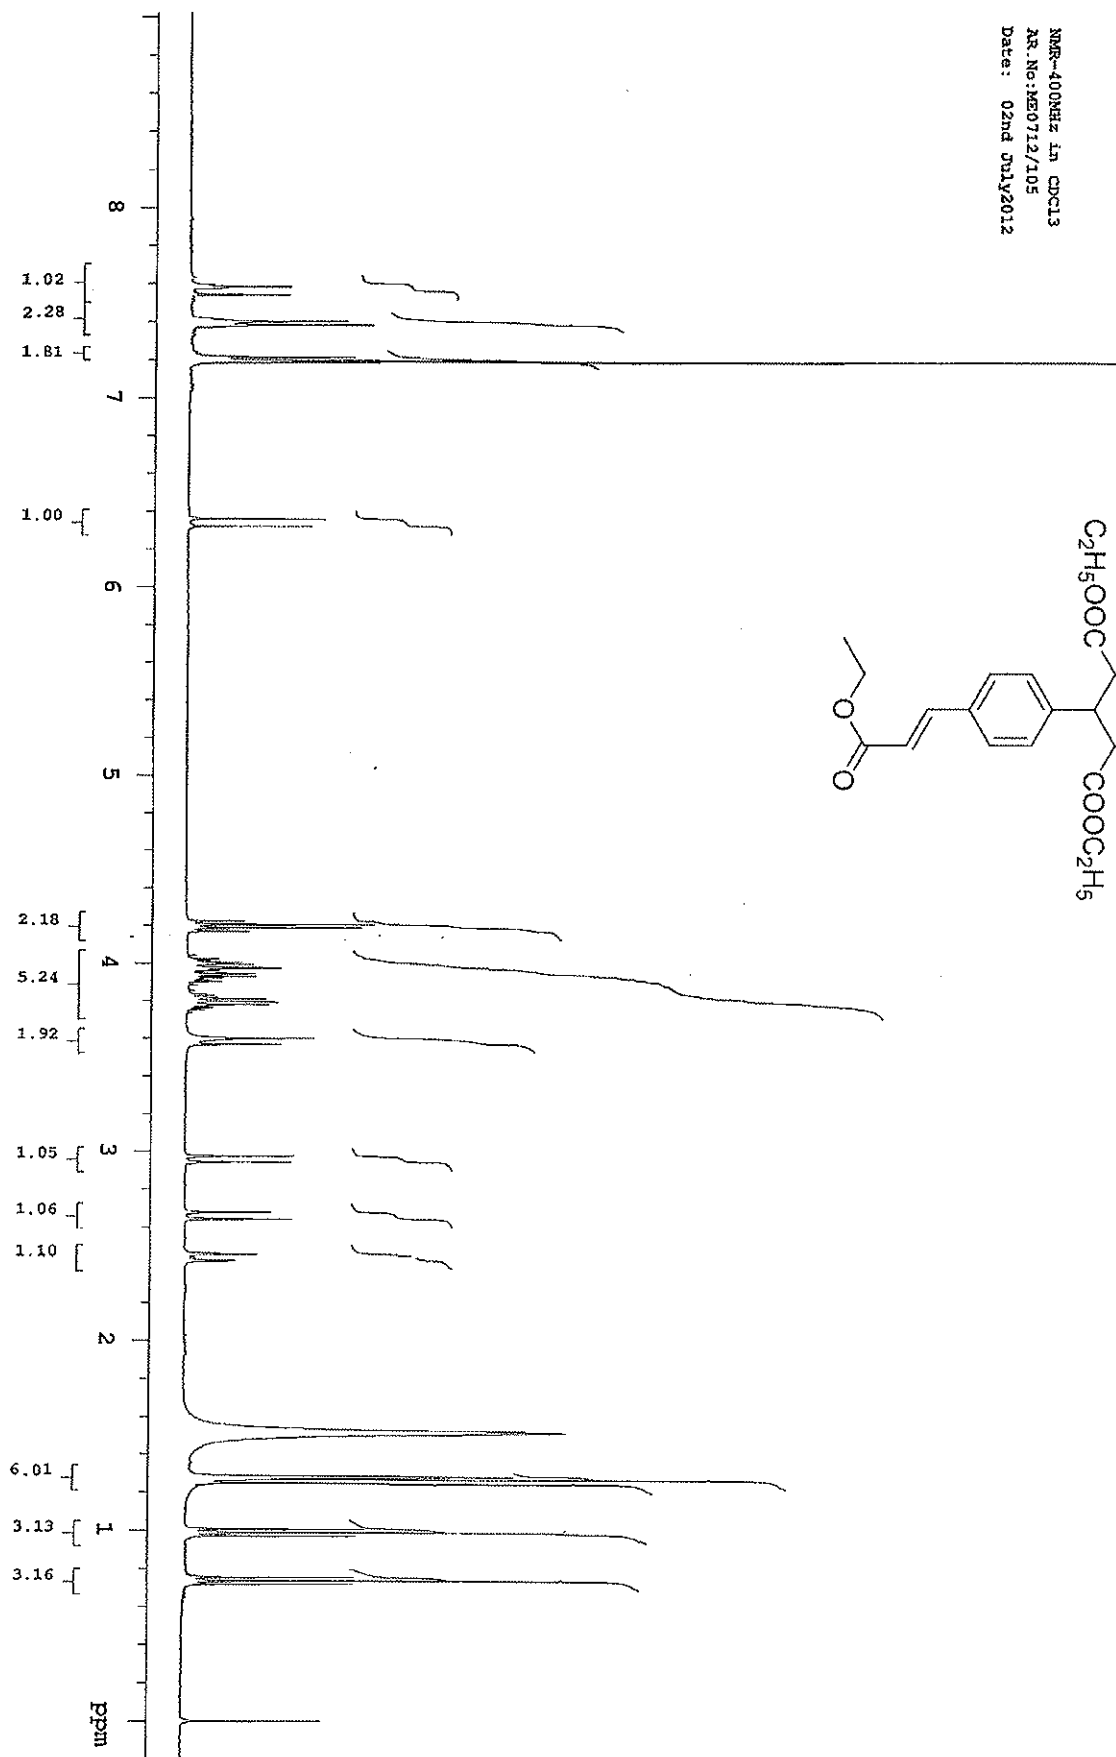

NMR-400MHz in DMSO  
AR.No:ME0812/218  
Date:02nd August, 2012

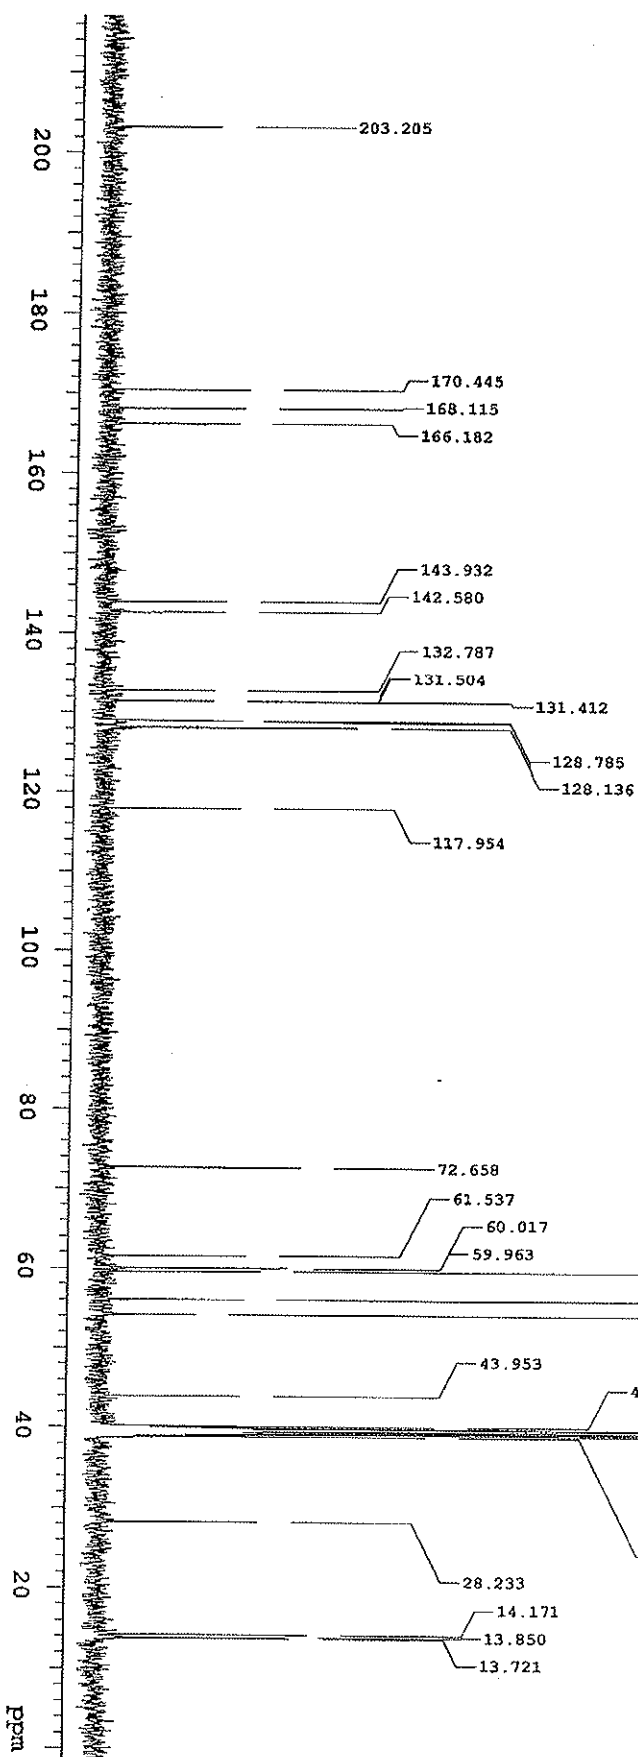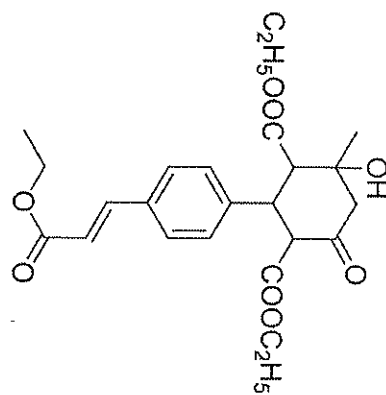

**Single Mass Analysis**

Tolerance = 5.0 PPM / DBE: min = -1.0, max = 80.0  
 Element prediction: Off  
 Number of isotope peaks used for i-FIT = 3

Monoisotopic Mass, Even Electron Ions  
 57 formula(e) evaluated with 1 results within limits (up to 5 closest results for each mass)  
 Elements Used:  
 C: 0-50 H: 0-60 O: 0-10

UT0812\_037 16 (0.293) Cm (13:20)

Dr. Readdy's Laboratories Ltd, ARD, TDC-1

1: TOF MS ES+  
 2.24e+003

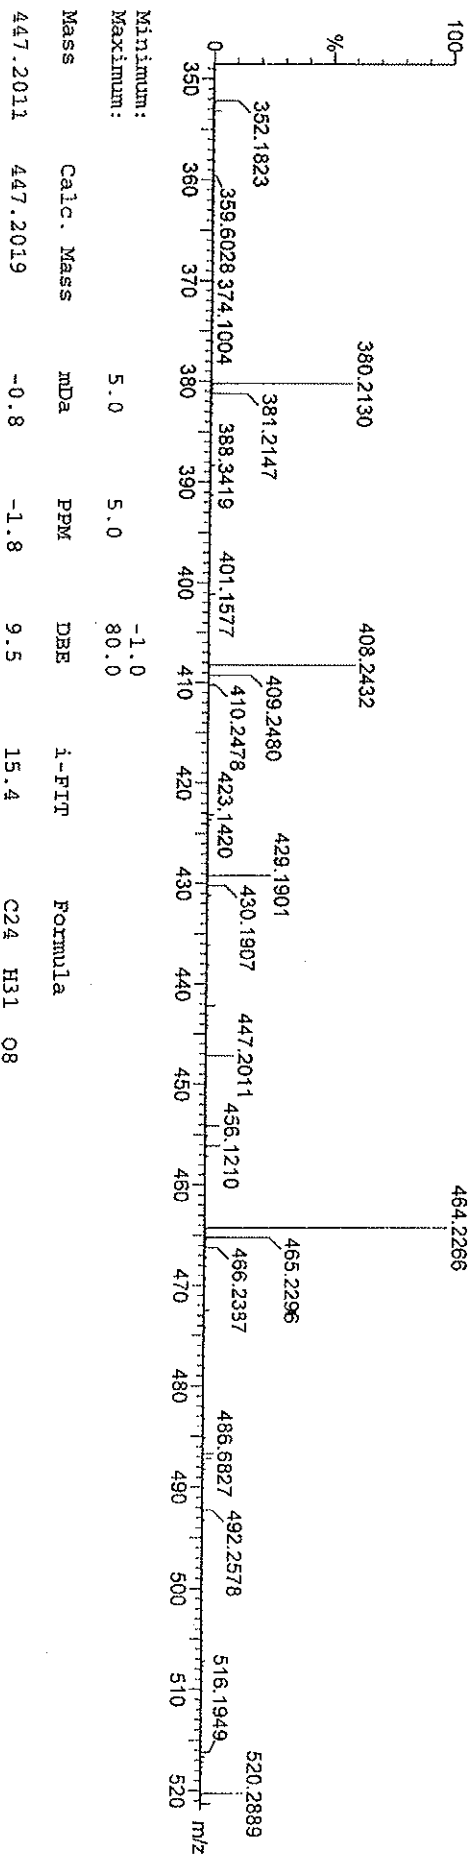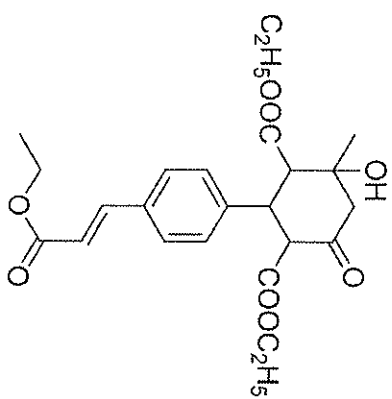

NMR-400MHz in DMSO  
Ac.No:MS0912/1896  
Date:21st Sep2012

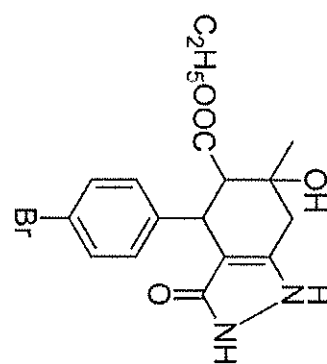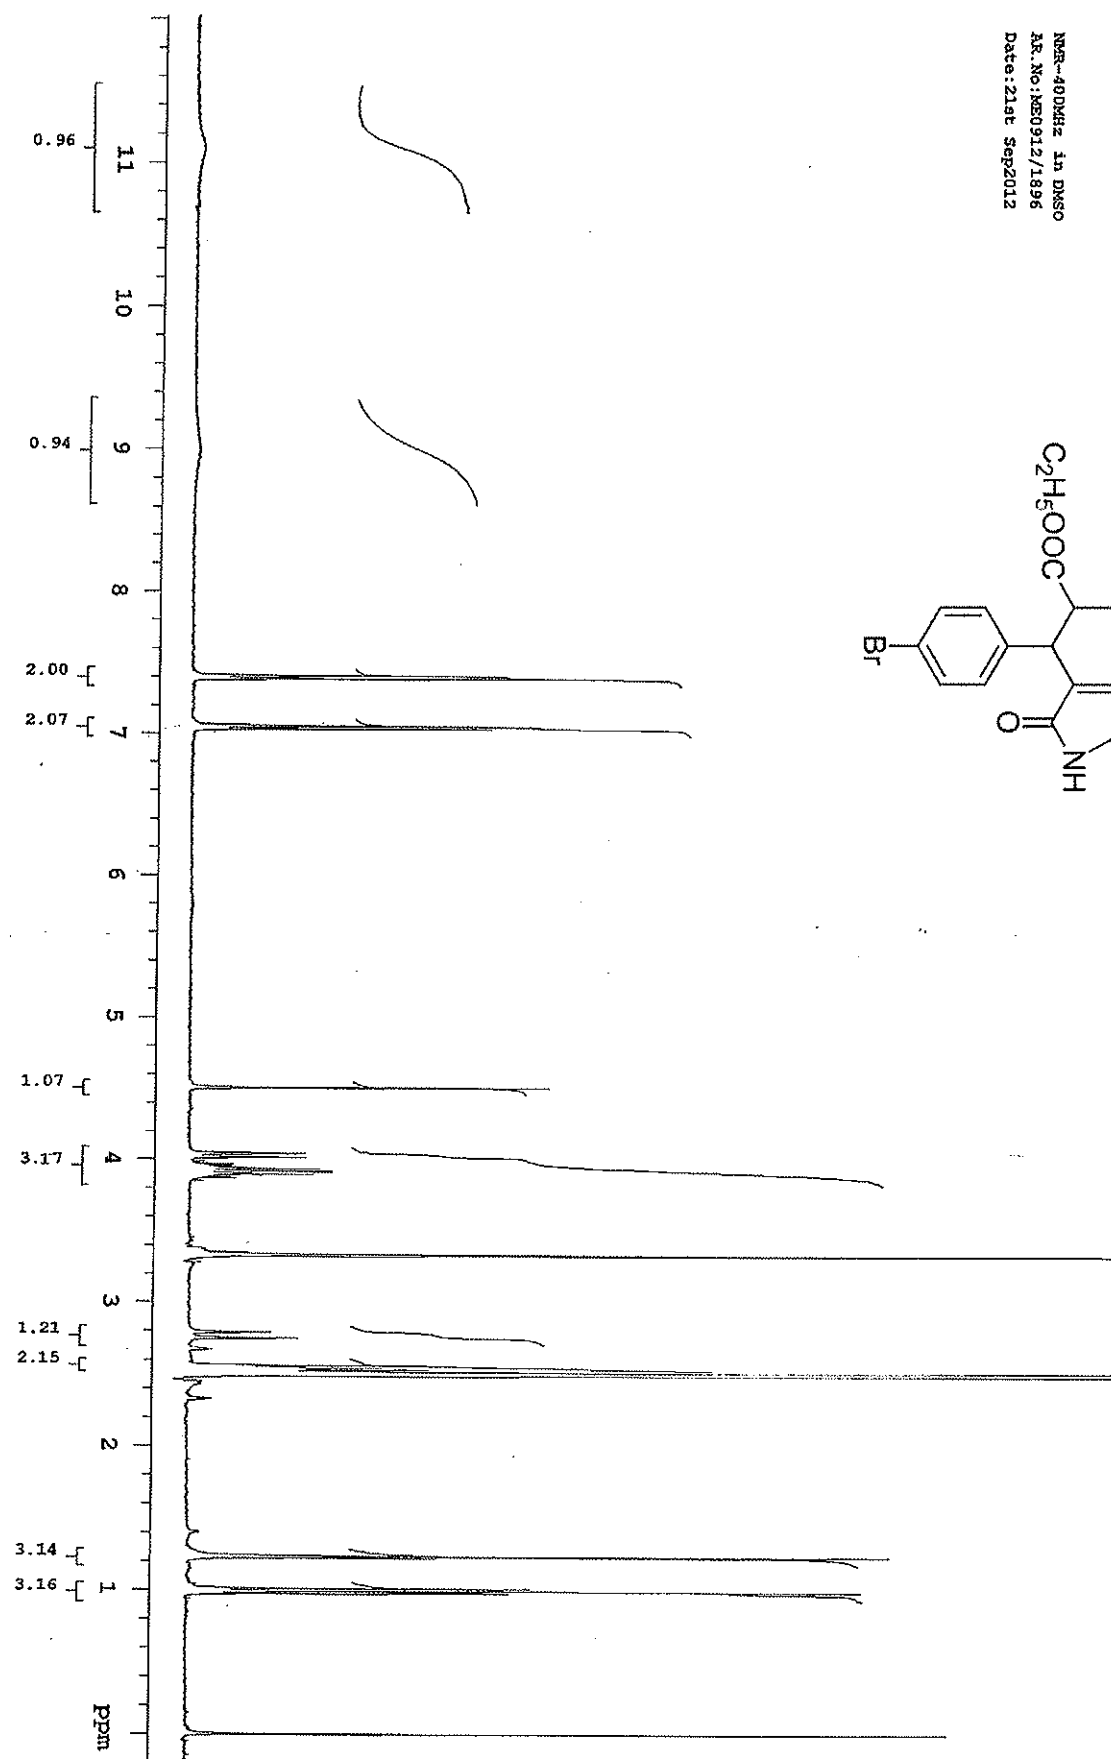



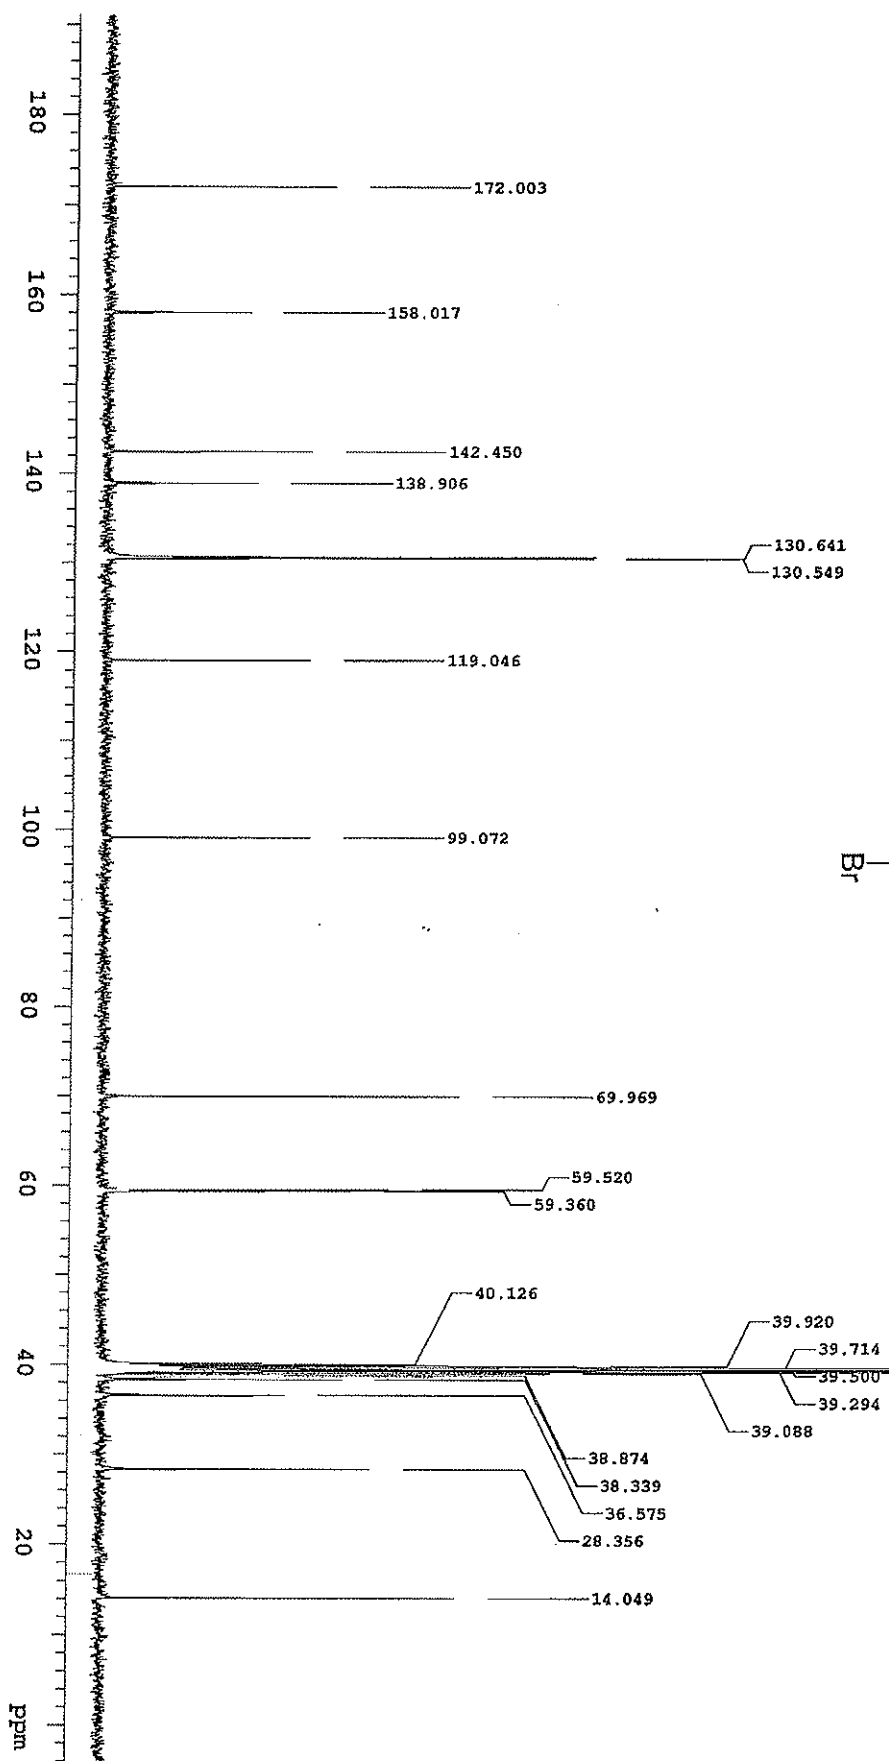

NMR-400MHz in DMSO  
AR.No:KE0912/2404  
Date:25th Sep2012

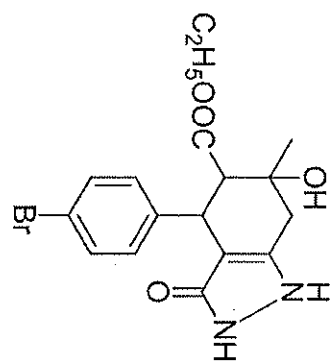

## Elemental Composition Report

### Single Mass Analysis

Tolerance = 10.0 PPM / DBE: min = -1.5, max = 80.0  
Element prediction: Off  
Number of isotope peaks used for i-FIT = 3

Monoisotopic Mass, Even Electron Ions  
61 formula(e) evaluated with 1 results within limits (up to 4 best isotopic matches for each mass)  
Elements Used:  
C: 0-20 H: 0-20 N: 0-4 O: 0-5 Br: 0-1

A786/CSAT2/084  
UT1211\_036 25 (0.472) Cm (25:26-77:84x0.010)

1: TOF MS ES+  
6.11e+003

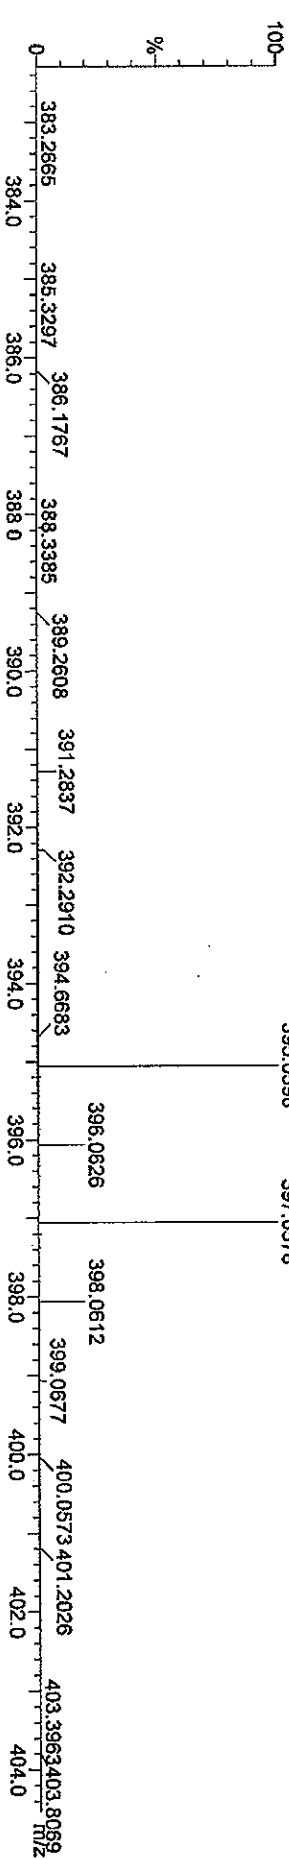

Minimum: 5.0  
Maximum: 10.0  
-1.5  
80.0

| Mass     | Calc. Mass | mDa  | PPM  | DBE | i-FIT | Formula          |
|----------|------------|------|------|-----|-------|------------------|
| 395.0598 | 395.0606   | -0.8 | -2.0 | 8.5 | 0.8   | C17 H20 N2 O4 Br |

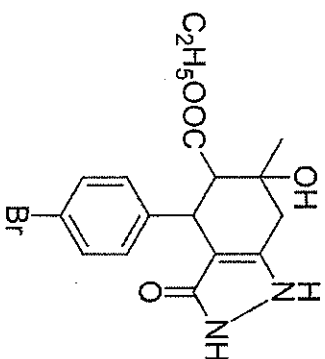

NMR-400MHz in DMSO  
R.R. No: M0512/2365  
Date: 25th May, 2012

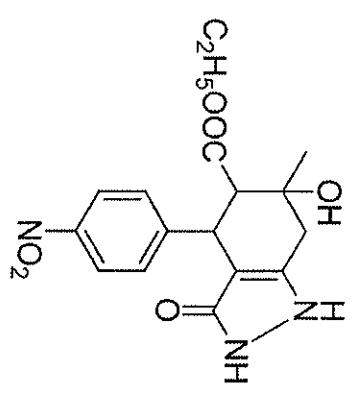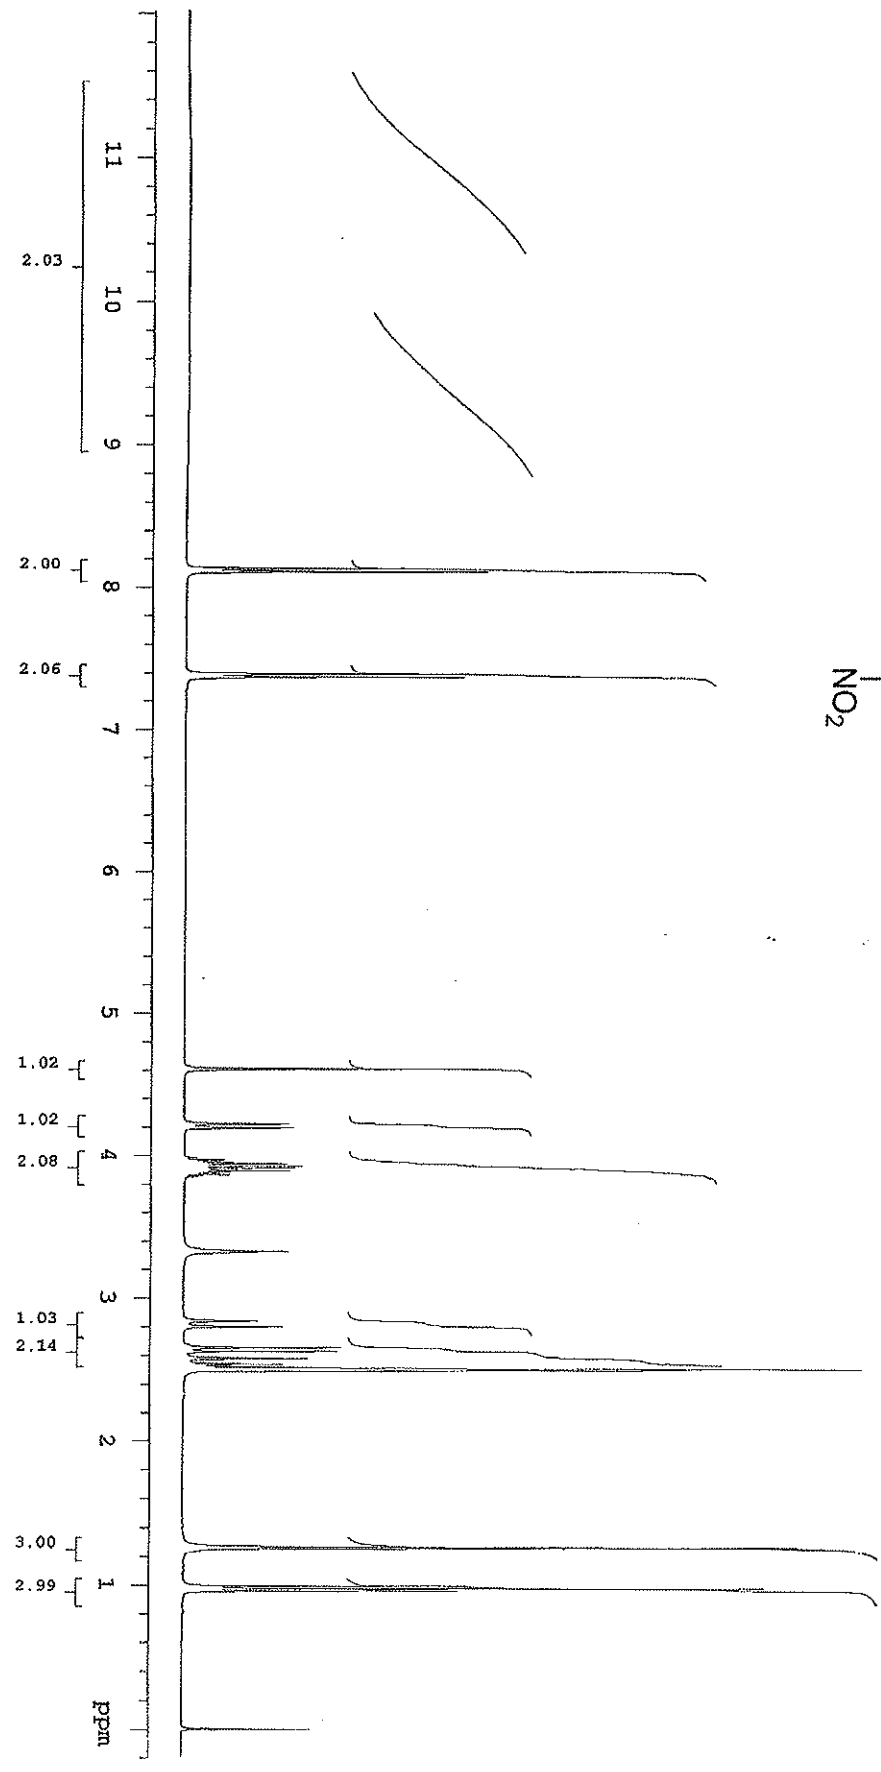

NR-400MHz in DMSO  
AR No:MB0512/2636  
Date: 25th May, 2012

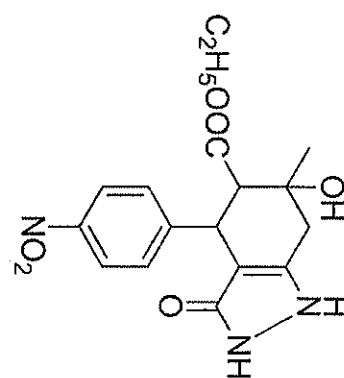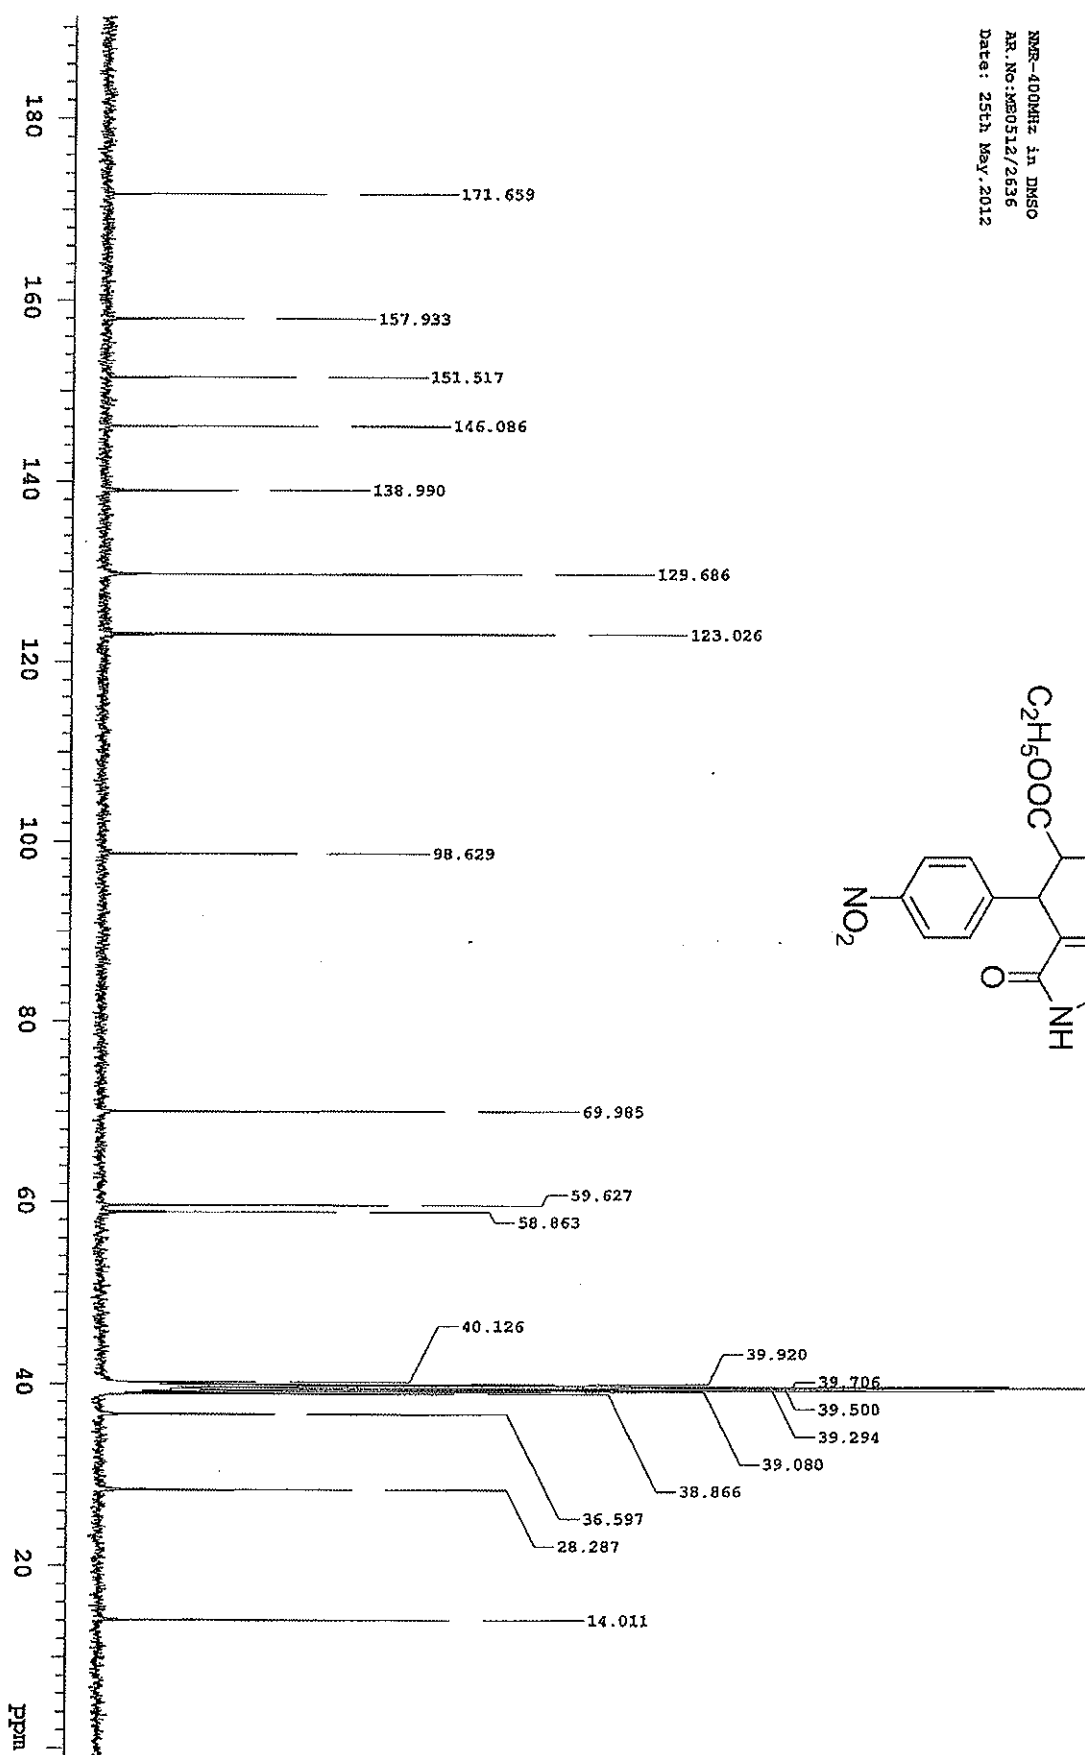

**Single Mass Analysis**

Tolerance = 5.0 PPM / DBE: min = -1.0, max = 40.0  
 Element prediction: Off  
 Number of isotope peaks used for i-FIT = 2

Monoisotopic Mass, Even Electron Ions  
 129 formula(e) evaluated with 1 results within limits (up to 5 best isotopic matches for each mass)  
 Elements Used:

C: 0-25 H: 0-30 N: 0-4 O: 0-10

Dr.Reddy's Laboratories Ltd, ARD,TDC-1

UT0612\_031 37 (1.322) Cm (37.49)

1: TOF MS ES+  
 4.41e+003

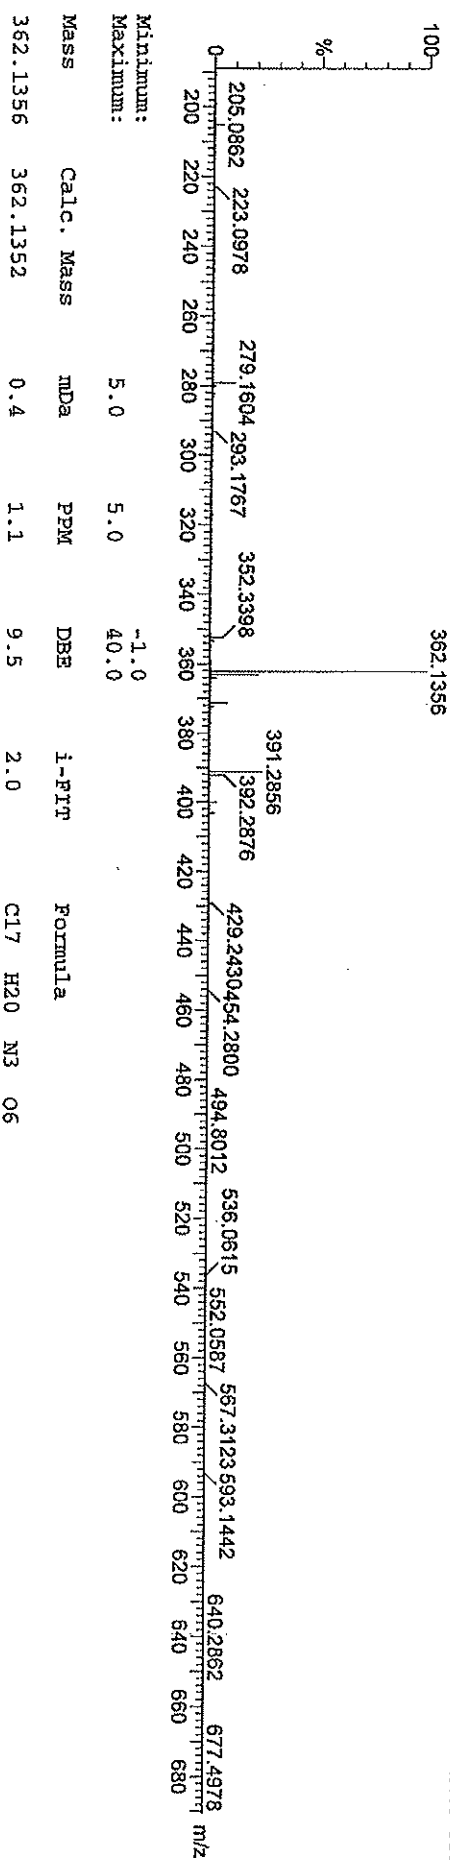

| Mass     | Calc. Mass | MDa | PPM | DBE | i-FITP | Formula       |
|----------|------------|-----|-----|-----|--------|---------------|
| 362.1356 | 362.1352   | 0.4 | 1.1 | 9.5 | 2.0    | C17 H20 N3 O6 |

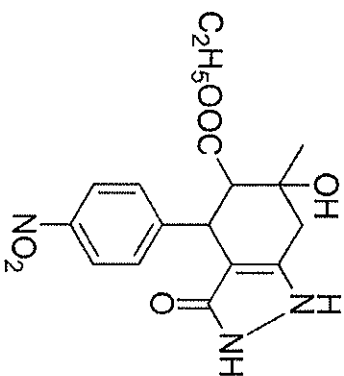

NMR-400MHz in DMSO  
R.R.No:ME0512/2491  
Date: 26th June,2012

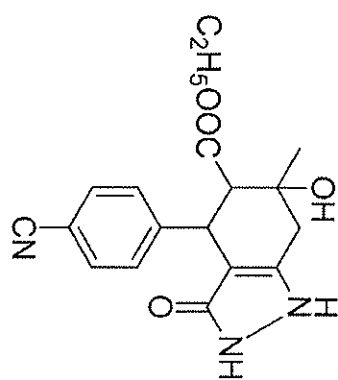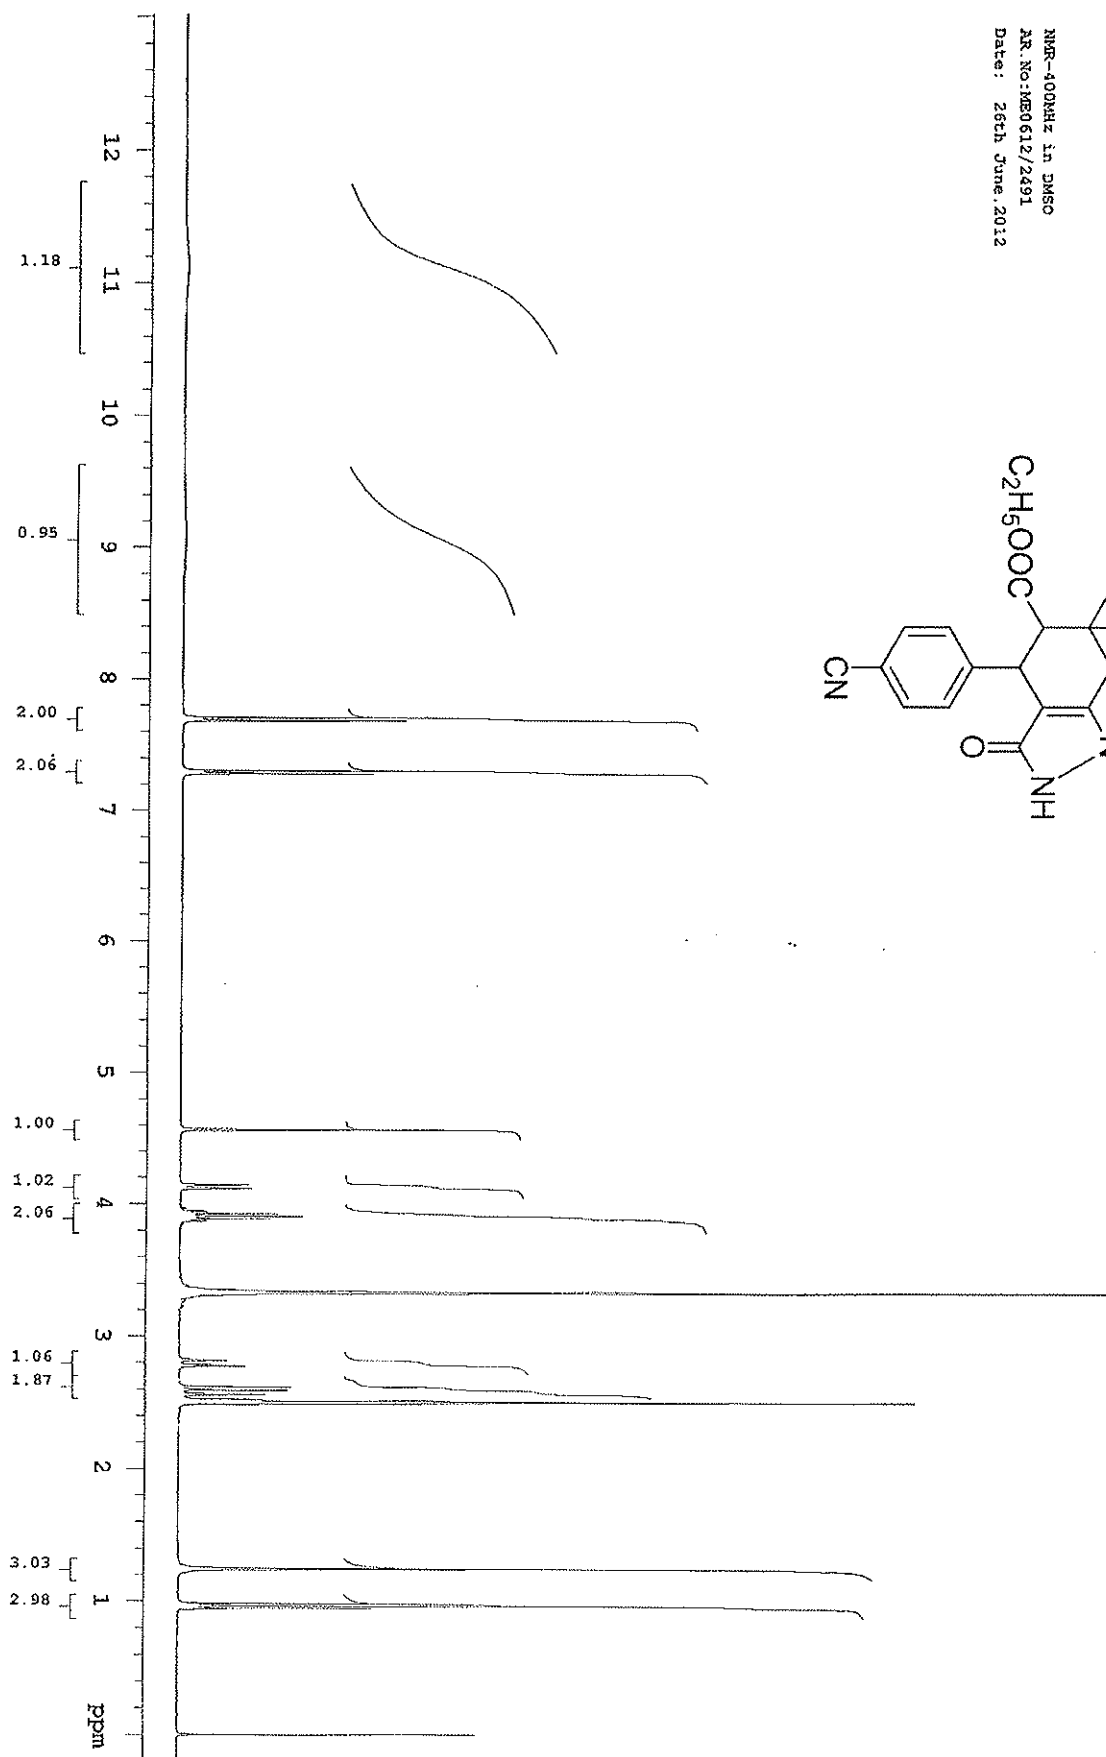

NMR-400MHz in DMSO  
Ac. No: ME0512/2637  
Date: 25th May, 2012

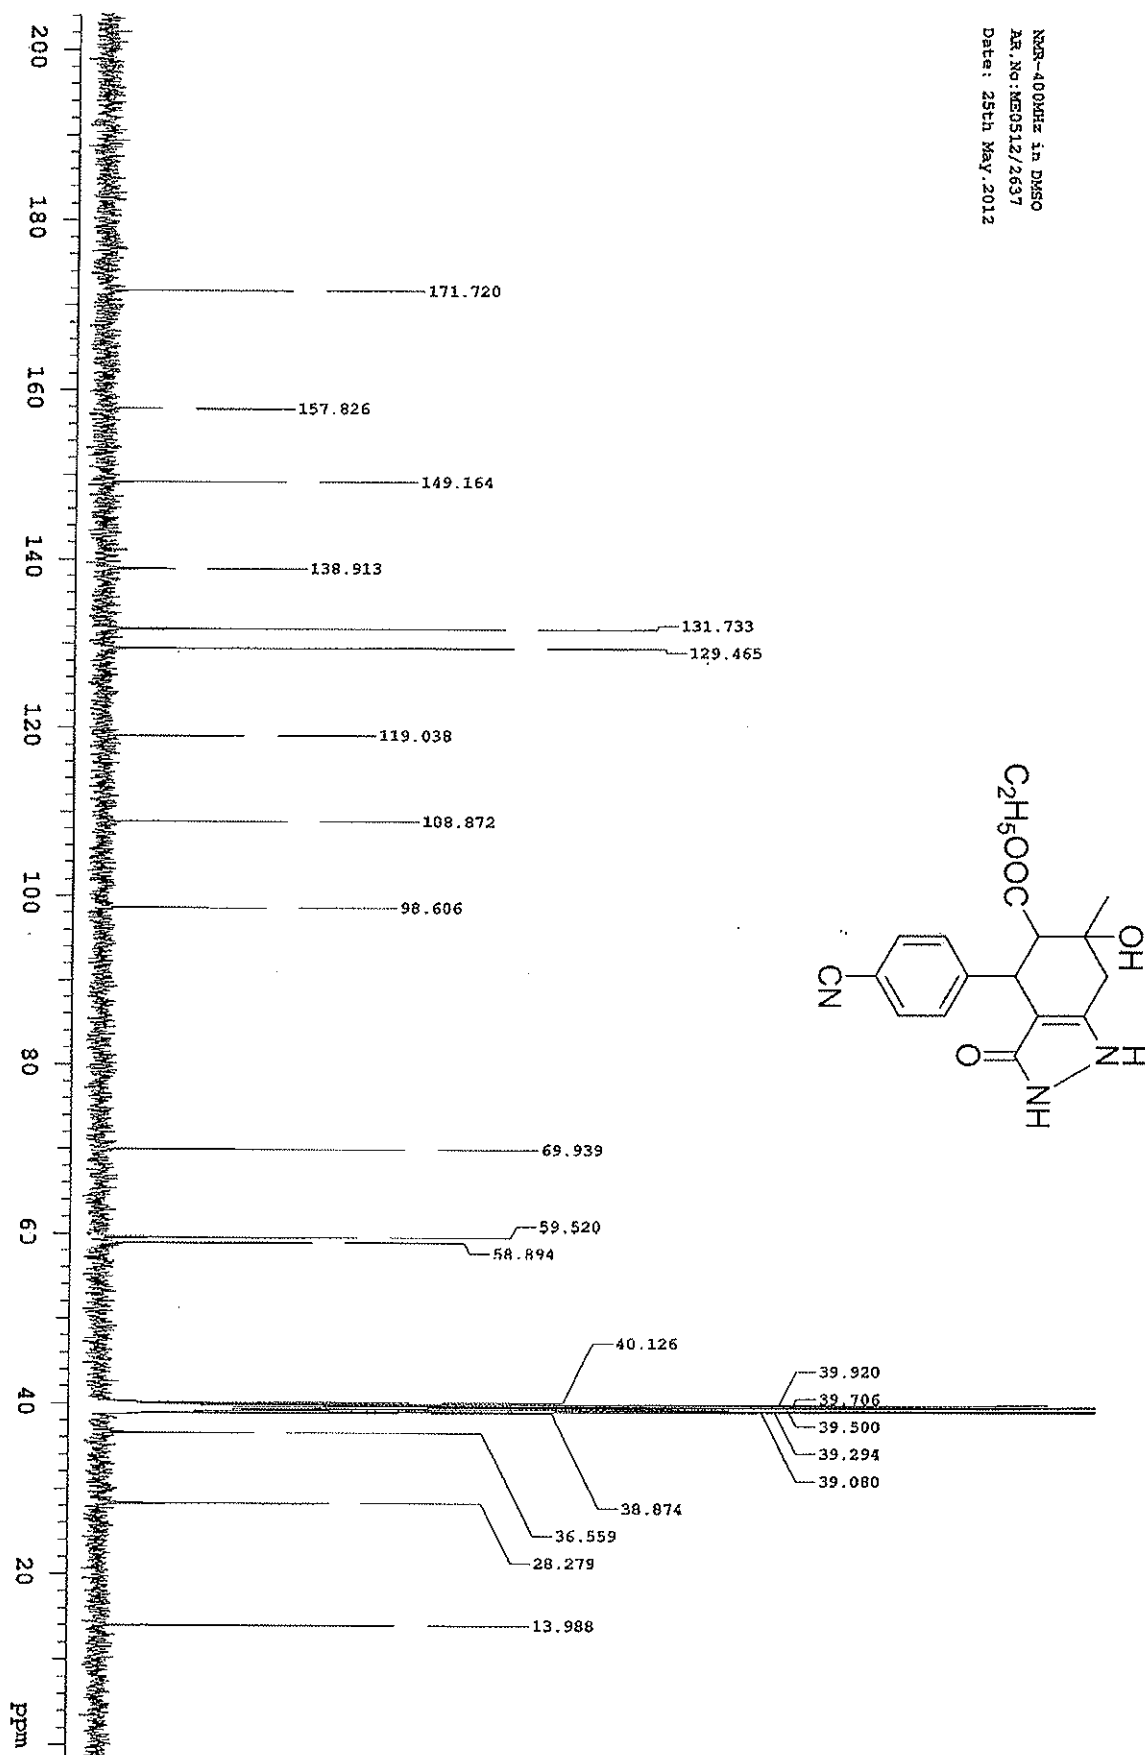

**Single Mass Analysis**

Tolerance = 5.0 PPM / DBE: min = -1.0, max = 40.0

Element prediction: Off

Number of isotope peaks used for i-FIT = 2

Monoisotopic Mass, Even Electron Ions

138 formula(e) evaluated with 1 results within limits (up to 5 best isotopic matches for each mass)

Elements Used:

C: 0-25 H: 0-30 N: 0-4 O: 0-10

Dr.Reddy's Laboratories Ltd, ARD, TDC-1

UT0512\_030 32 (1.123) Cm (29:38)

1: TOF MS ES+

7.00e+003

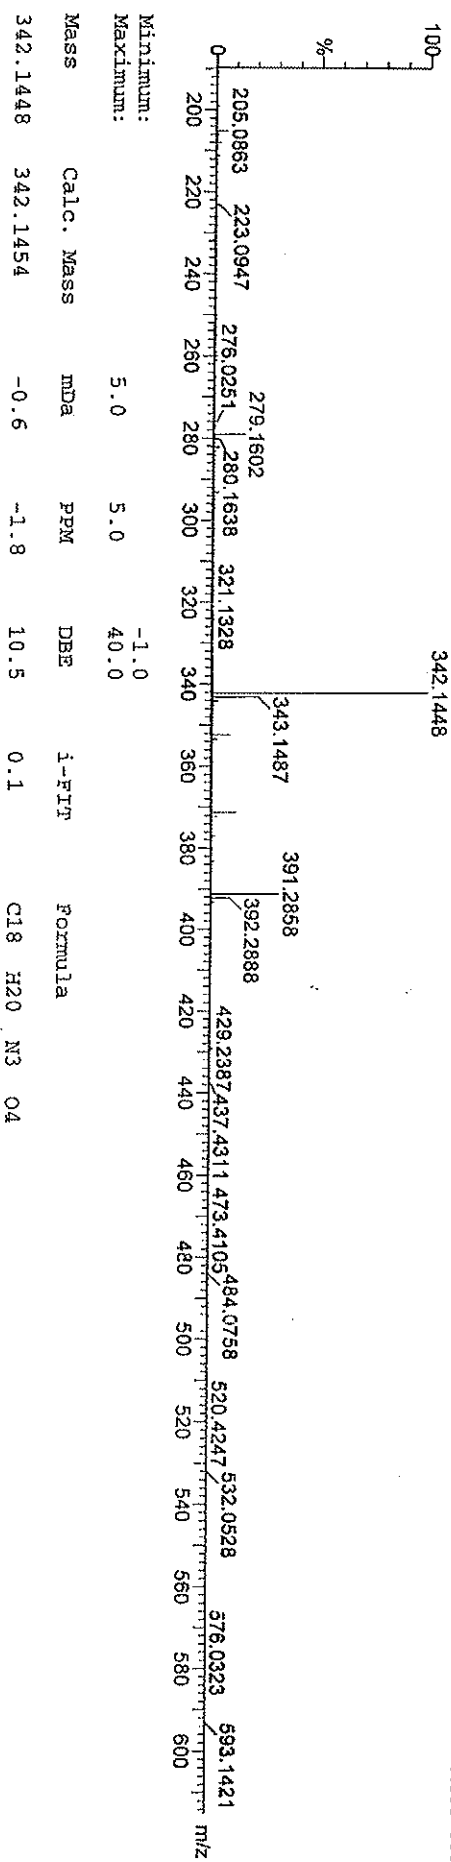

Minimum: 5.0  
 Maximum: 5.0

| Mass     | Calc. Mass | MDA  | PPM  | DBE  | i-FIT | Formula       |
|----------|------------|------|------|------|-------|---------------|
| 342.1448 | 342.1454   | -0.6 | -1.8 | 10.5 | 0.1   | C18 H20 N3 O4 |

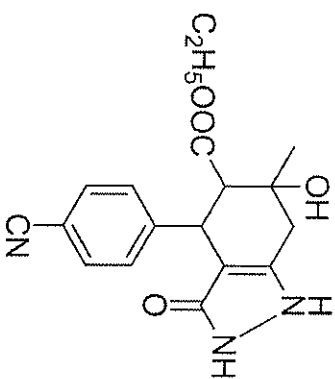



NMR-400MHz in DMSO  
AR.No:ME0912/1897  
Date:21st Sep2012

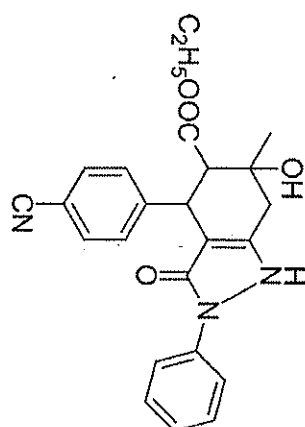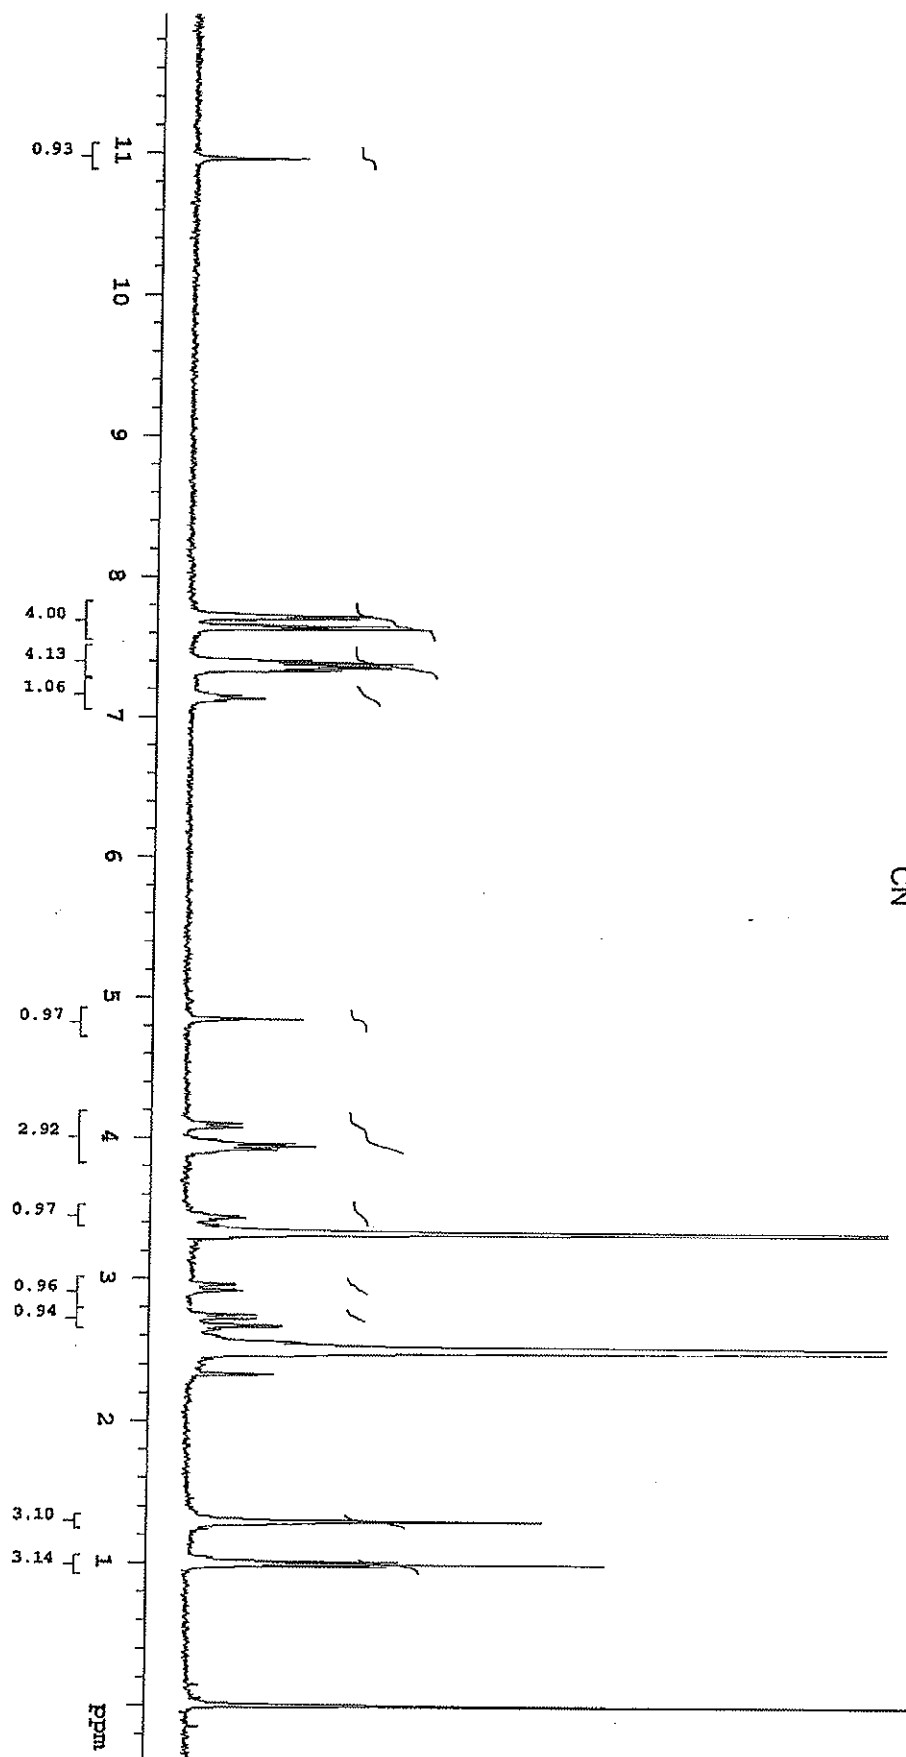

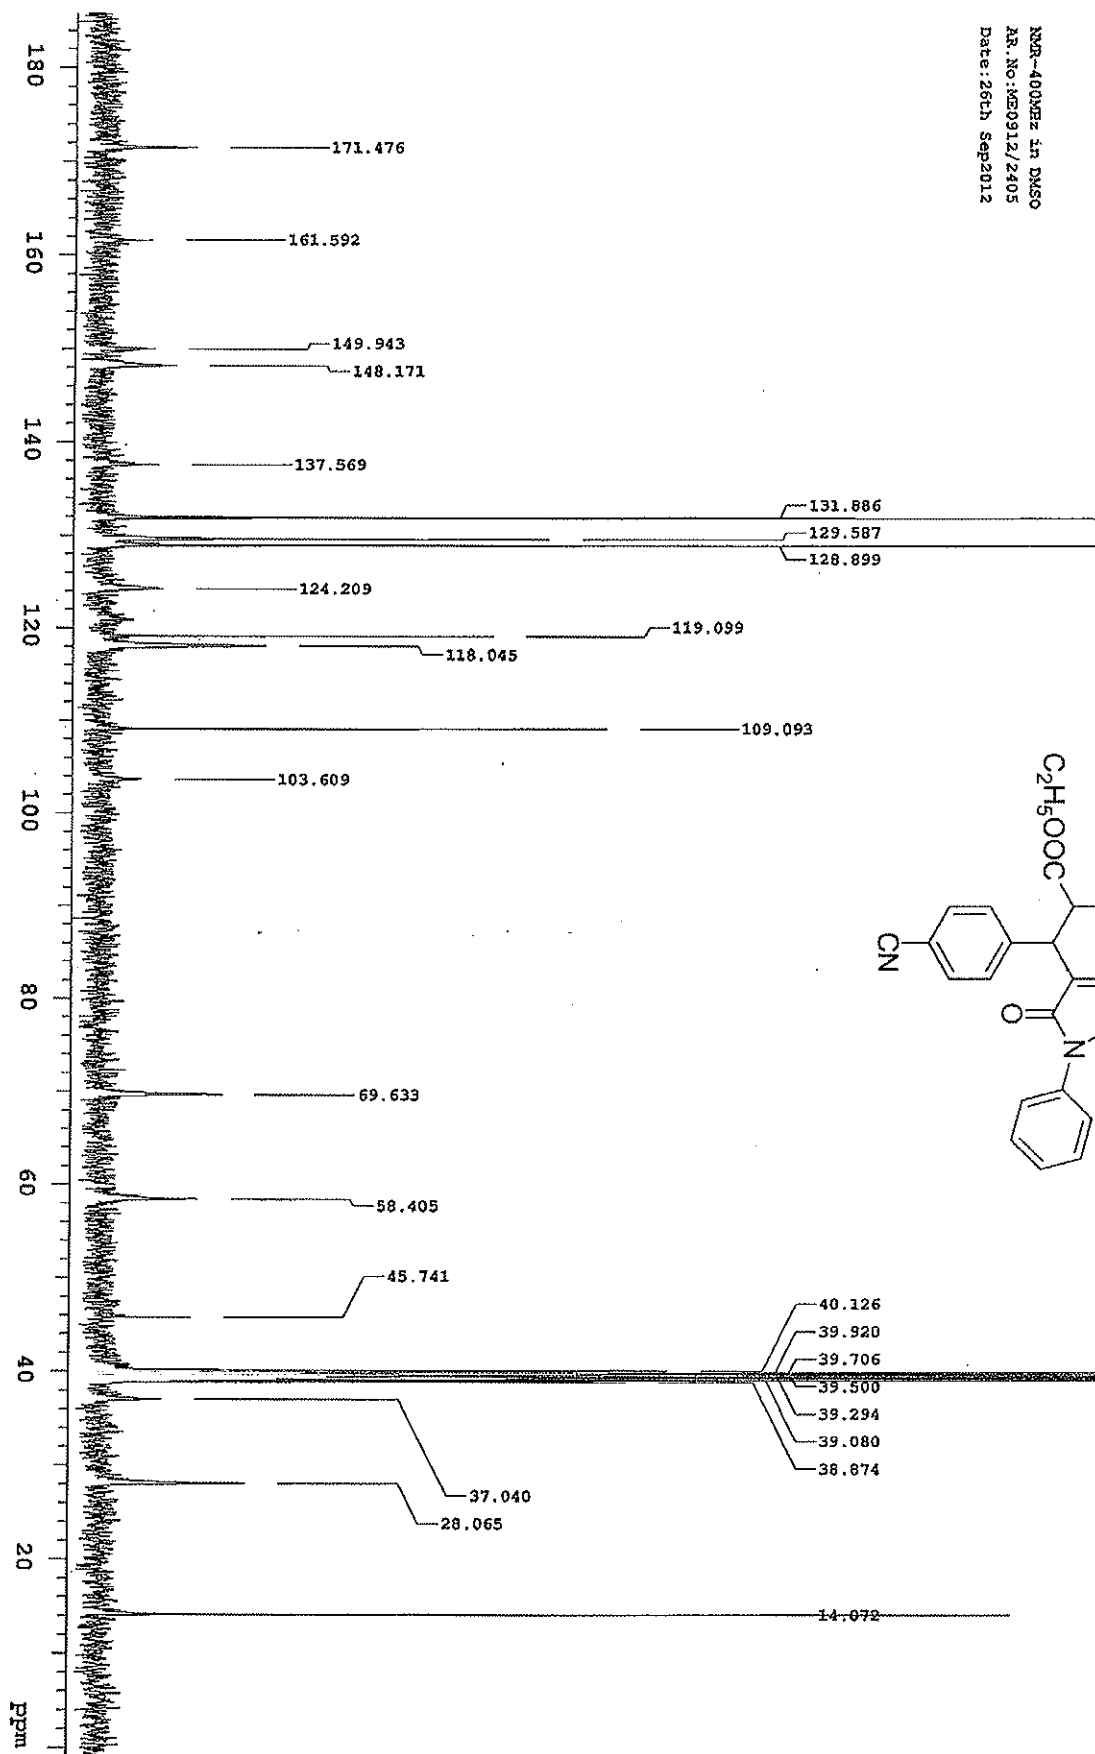

NMR-400MHz in DMSO  
R.N: KE0912/2405  
Date: 26th Sep 2012

## Elemental Composition Report

### Single Mass Analysis

Tolerance = 20.0 PPM / DBE: min = -1.5 max = 80.0

Element prediction: Off

Number of isotope peaks used for i-FIT = 3

Monoisotopic Mass, Even Electron Ions

27 formula(e) evaluated with 1 results within limits (up to 4 best isotopic matches for each mass)

Elements Used:

C: 0-26 H: 0-26 N: 0-4 O: 0-5

UT1211\_037 16 (0.292) Cm (14:18-49:56x0.010)

1: TOF MS ES+  
1.12e+005

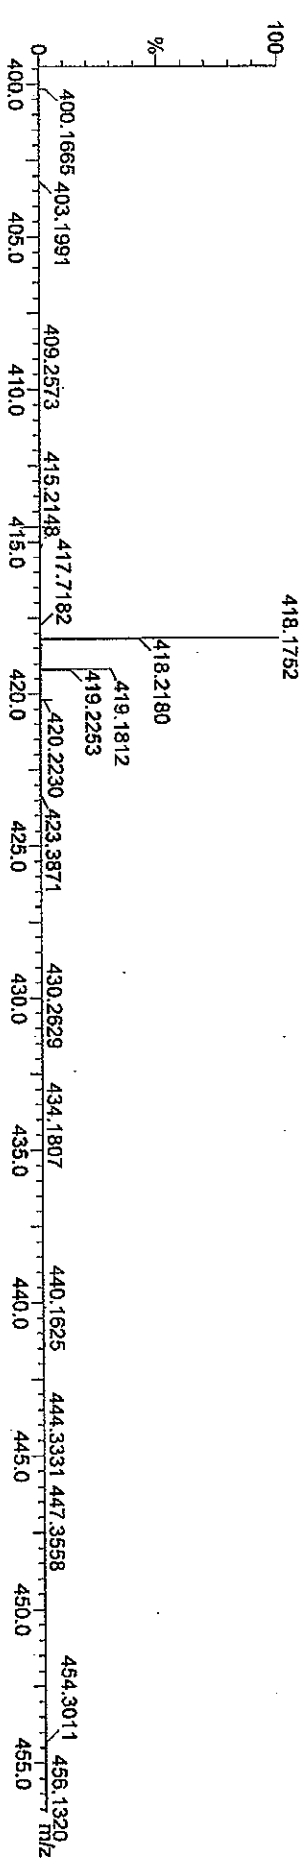

Minimum: 5.0  
Maximum: 80.0

| Mass     | Calc. Mass | mDa  | PPM  | DBE  | i-FIT | Formula       |
|----------|------------|------|------|------|-------|---------------|
| 418.1752 | 418.1767   | -1.5 | -3.6 | 14.5 | 26.9  | C24 H24 N3 O4 |

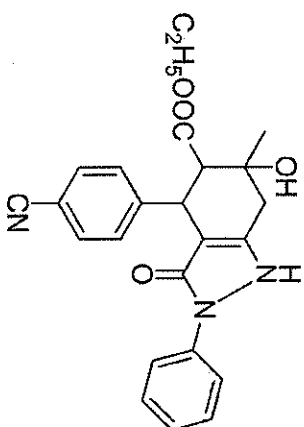

MKR-400MHz in DMSO  
AR\_No:ME0912/1896  
Date:21st Sep2012

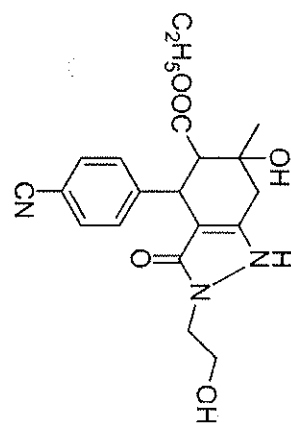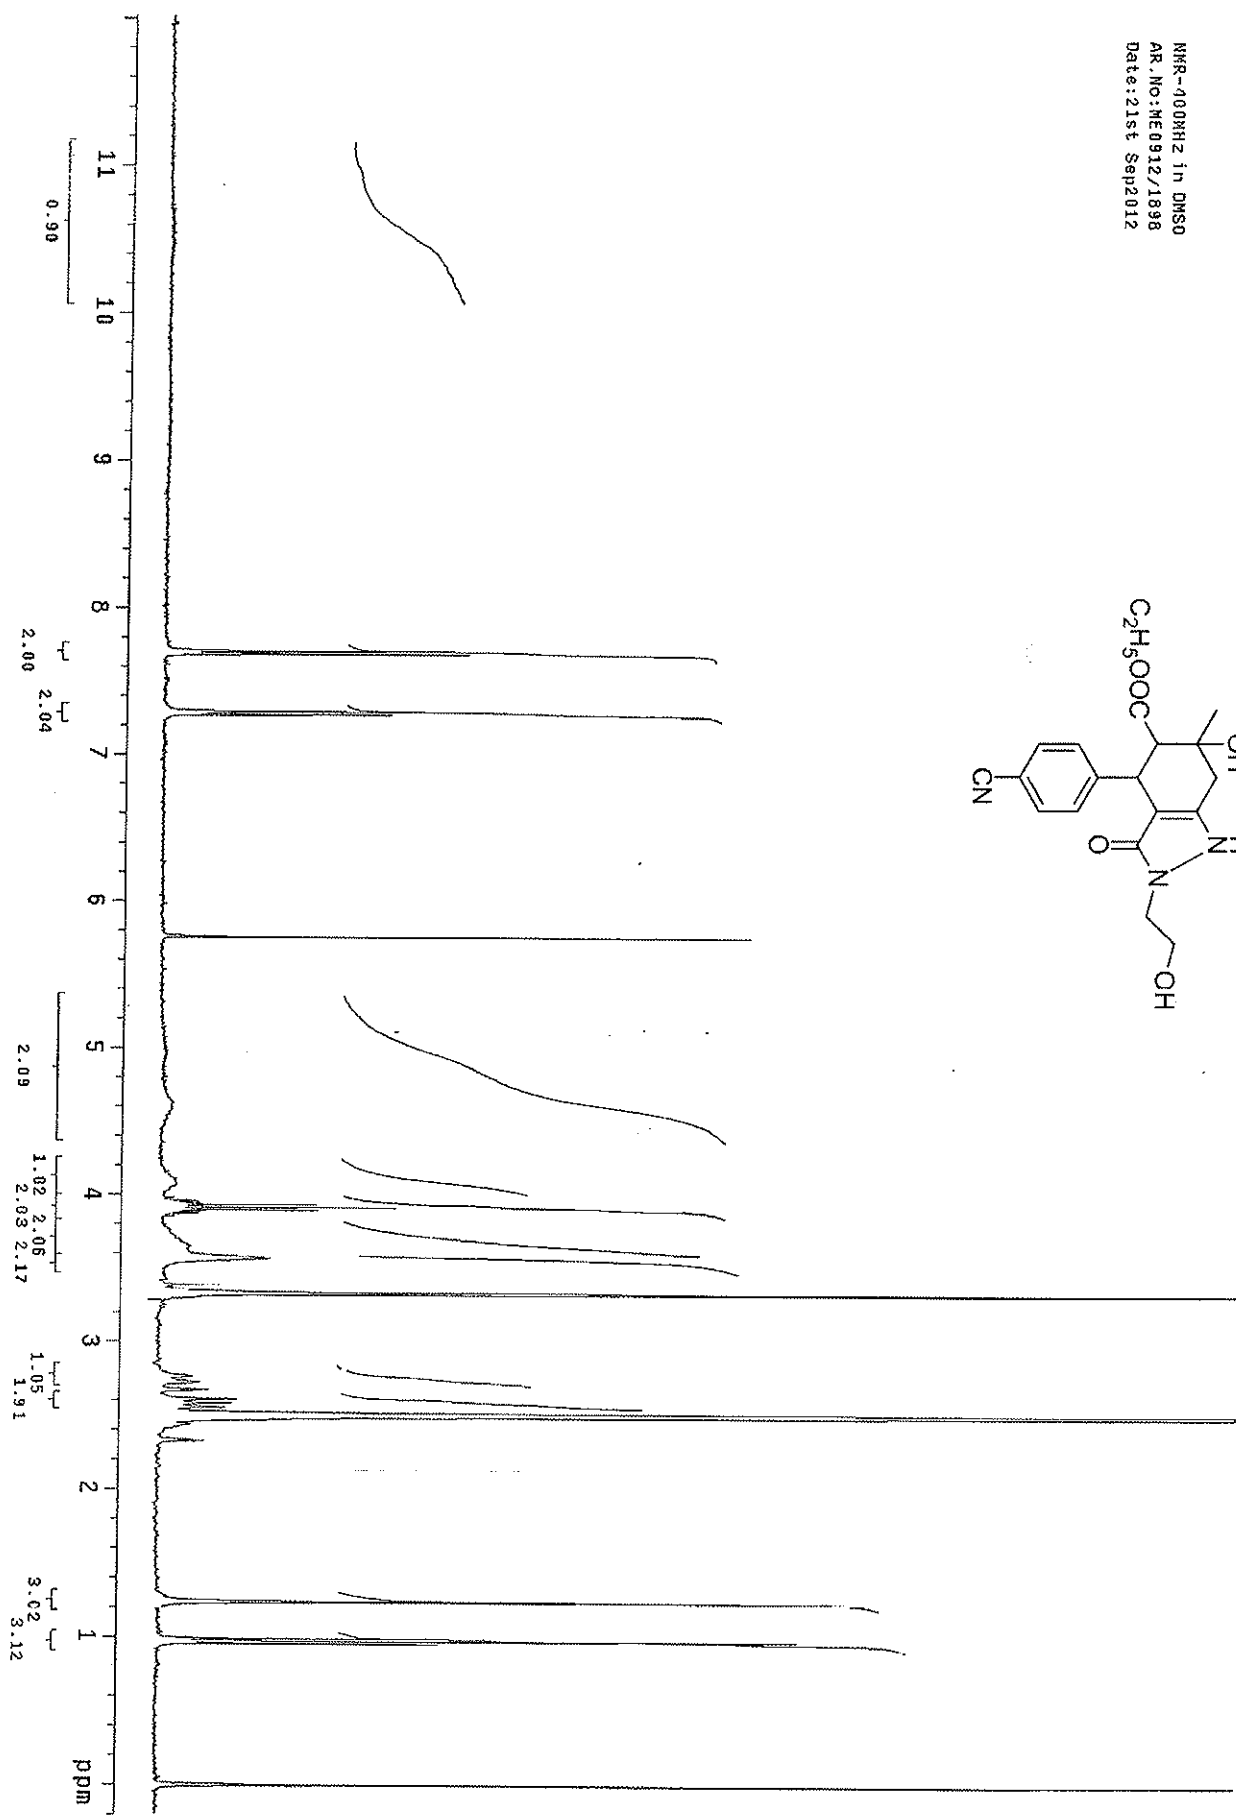

NMR-400MHz in DMSO  
Ac. No: ME0912/2733  
Date: 28th Sep 2012

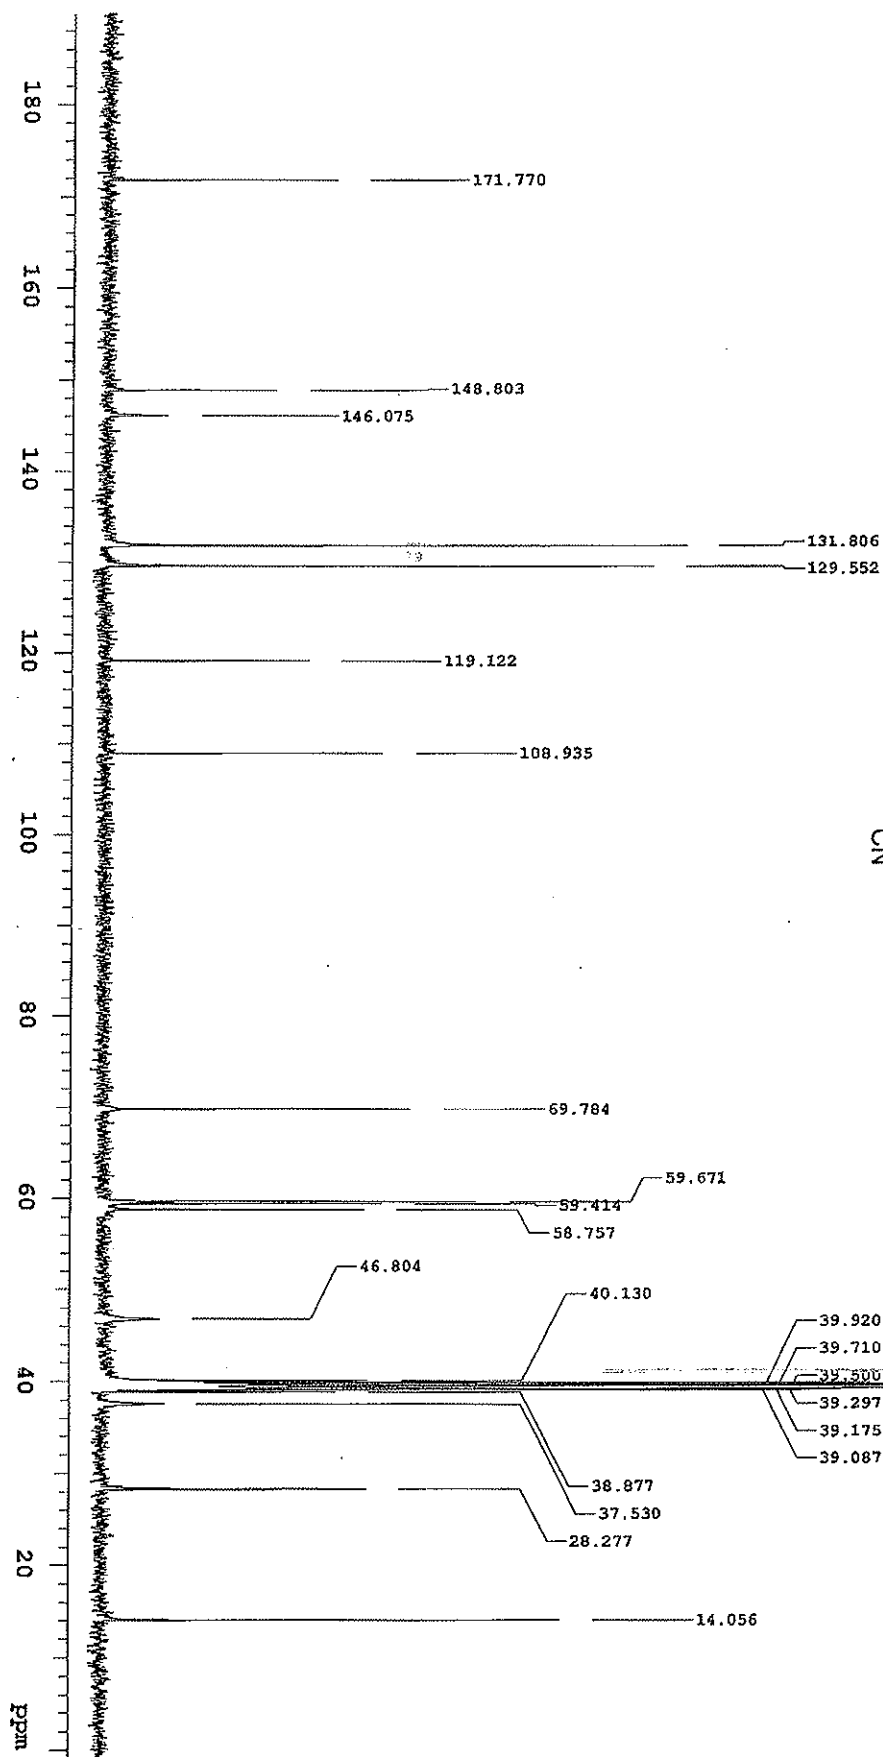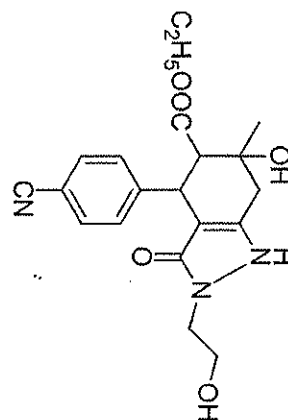

## Elemental Composition Report

### Single Mass Analysis

Tolerance = 5.0 PPM / DBE: min = -1.5, max = 80.0  
 Element prediction: Off  
 Number of isotope peaks used for i-FIT = 3

Monoisotopic Mass, Even Electron Ions  
 45 formula(e) evaluated with 1 results within limits (up to 4 best isotopic matches for each mass)  
 Elements Used:  
 C: 0-26 H: 0-26 N: 0-4 O: 0-5

UT1211\_038 18 (0.340) Cm (18:22-52:76x0.010)

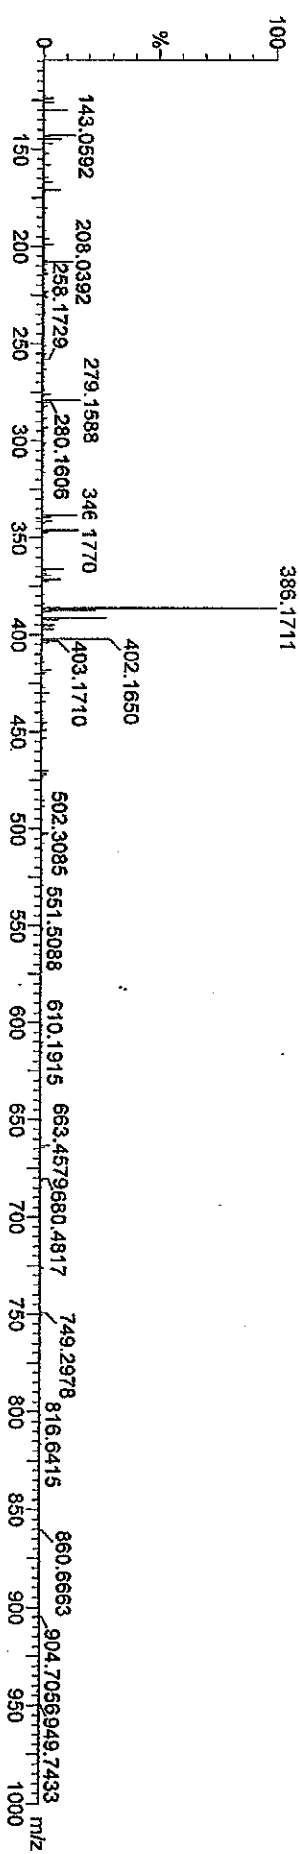

1: TOF MS ES+  
 4.60e+003

| Mass     | Calc. Mass | mDa  | PPM  | DBE  | i-FIT | Formula       |
|----------|------------|------|------|------|-------|---------------|
| 386.1711 | 386.1716   | -0.5 | -1.3 | 10.5 | 0.8   | C20 H24 N3 O5 |
| Minimum: |            |      | 5.0  | 5.3  |       | -1.5          |
| Maximum: |            |      |      |      |       | 80.0          |

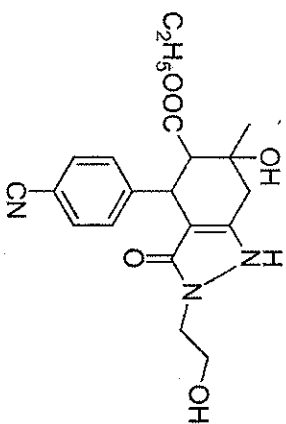

Supplement: c2ra23039a_2.pdf [file c2ra23039a_2.pdf]
